# Supplementary material
Source: publisher figshare collection journal article supplement (https://acs.figshare.com/ndownloader/files/5122828)

**Highly Enantioselective and Regioselective Nickel-Catalyzed Coupling of Allenes,  
Aldehydes, and Silanes**

Ng, S.-S.; Jamison, T. F. \*

Massachusetts Institute of Technology, Department of Chemistry, Cambridge, MA 02139

**Supporting Information**

Experimental Procedures, Analytical and Spectroscopic Data for Compounds **1a** – **5d**.

Pages S2 – S22

References

Page S22

<sup>1</sup>H and <sup>13</sup>C NMRs for compounds **1a** – **5d**.

Pages S23 – S63

## General Information.

Unless otherwise noted, all reactions were performed under an oxygen-free atmosphere of nitrogen or argon with rigid exclusion of moisture from reagents and glassware. Tetrahydrofuran was distilled from a blue solution of sodium benzophenone ketyl. Dichloromethane was distilled from calcium hydride. Triethylsilane, *tert*-butyl-dimethylsilane and dimethylphenylsilane were purchased from Aldrich Chemical Co. and were saturated with nitrogen before use. Benzaldehyde was purchased from Aldrich Chemical Co., distilled by bulb to bulb distillation and then saturated with nitrogen before storage under nitrogen. Other aromatic aldehydes were purchased from Aldrich Chemical Co. and were used without further purification. Bis(cyclooctadienyl)nickel(0) ( $\text{Ni}(\text{cod})_2$ ) and tricyclopentylphosphine were purchased from Strem Chemicals, Inc., stored under nitrogen atmosphere and used without further purification. 1,3-Bis-(2,6-di-isopropylphenyl)imidazol-2-ylidene (NHC-IPr) was prepared according to literature procedure.<sup>1</sup> Triethylsilane-d was prepared according to literature procedure.<sup>2</sup> Cyclohexanecarboxaldehyde, methyl lithium, Amano lipase, vinylacetate, acetaldehyde, methyl-(*R*)-mandelate, cyclohexanecarboxylic acid and Mosher's acid were purchased from Aldrich Chemical Co. and used as received (unless otherwise noted). Carbon tetrabromide, triphenylphosphine and 4-(dimethylamino)-pyridine were purchased from Alfa Aesar and used as received. *tert*-butylacetylene and 1-pentyne were purchased from GFS and used as received. Diethylazodicarboxylate was purchased from Lancaster and used as received. Dicyclohexylcarbodiimide was purchased from Pierce and used as received.

Analytical thin layer chromatography (TLC) was performed using EM Science silica gel 60 F<sub>254</sub> plates. The developed chromatogram was analyzed by UV lamp (254 nm), ethanolic phosphomolybdic acid (PMA) or potassium permanganate ( $\text{KMnO}_4$ ). Liquid chromatography was performed using a forced flow (flash chromatography) of the indicated solvent system on Silicycle Silica Gel (230 – 400 mesh).  $^1\text{H}$  and  $^{13}\text{C}$  NMR spectra were recorded on Varian 300 MHz, Varian 500 MHz or Bruker 400 MHz spectrometer in  $\text{CDCl}_3$  or  $\text{C}_6\text{D}_6$ , unless otherwise noted. Chemical shifts in  $^1\text{H}$  NMR spectra are reported in parts per million (ppm) on the  $\delta$  scale from an internal standard of residual chloroform (7.27 ppm) or residual benzene (7.16 ppm). Data are reported as follows: chemical shift, multiplicity (s = singlet, d = doublet, t = triplet, q = quartet, m = multiplet, b = broad), coupling constant in hertz (Hz), and integration. Chemical shifts of  $^{13}\text{C}$  NMR spectra are reported in ppm from the central peak of  $\text{CDCl}_3$  (77.23 ppm) on the  $\delta$  scale. Infrared (IR) spectra were recorded on a Perkin-Elmer 2000 FT-IR. High resolution mass spectra (HRMS) were obtained on a Bruker Daltonics APEXII 3 Tesla Fourier Transform Mass Spectrometer by Dr. Li Li of the Massachusetts Institute of

Technology Department of Chemistry Instrument Facility. Chiral GC analysis was performed on a Varian CP-3800 gas chromatograph fitted with Chiraldex B-PH, B-DA, and G-TA capillary columns. Chiral HPLC analysis was performed on a Hewlett-Packard 1100 chromatograph equipped with a variable wavelength detector and Chiralcel OD or OD-H columns. Specific Rotations ( $[\alpha]_D$ ) were measured on a Perkin-Elmer 241 polarimeter at 589 nm.

### Preparation of 1,3-disubstituted allenes.

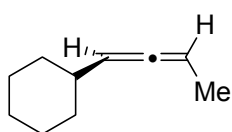

(*aS*)-buta-1,2-dienyl-cyclohexane (2b).

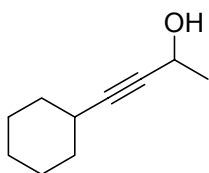

a. Preparation of (+/-)-4-cyclohexyl-but-3-yn-2-ol. Carbon-tetrabromide (73 g, 220 mmol) was dissolved in anhydrous dichloromethane (150 mL). The solution was cooled to 0 °C, triphenylphosphine (115 g, 440 mmol) was added. The mixture was stirred 30 min at 0 °C. Cyclohexanecarboxaldehyde (10 mL, 110 mmol) was added and the reaction mixture was slowly warmed to room temperature and stirred 12 h. The brown precipitate was removed by filtering the CH<sub>2</sub>Cl<sub>2</sub> solution through silica gel and the silica gel was washed with hexane. Evaporation of the solvents gave an oil with white precipitate. The crude was diluted with hexane and filtered through silica gel to yield a colorless oil (2,2-dibromo-vinyl)-cyclohexane (21.62 g, 74% yield). It was used without further purification. (2,2-Dibromo-vinyl)-cyclohexane (9.18 g, 34 mmol) was dissolved in anhydrous THF (40 mL) and was cooled to -78 °C. Methyllithium (55 mL, 88 mmol, 1.6 M in ether) was added to the solution over 5 min and the mixture was stirred 2.5 h at -78 °C. Acetaldehyde was added in one portion and the mixture was stirred 1.5 h and was warmed to room temperature. The reaction was quenched with water and extracted with diethylether (1 x 80 mL), which was washed with water and dried with MgSO<sub>4</sub>. Column chromatography afforded a yellow oil (+/-)-4-cyclohexyl-but-3-yn-2-ol (4.9 g, 94% yield).

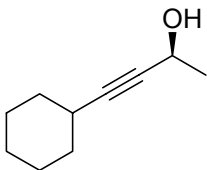

b. Preparation of enantiomerically enriched **(S)-4-cyclohexyl-but-3-yn-2-ol** by lipase resolution.<sup>3</sup> In an oven-dried round bottom flask, (+/-)-4-cyclohexyl-but-3-yn-2-ol (2.28 g, 15 mmol) was dissolved in anhydrous pentane (50 mL) at room temperature. 4Å molecular sieves (approximately half the volume of the solvent), Amano lipase AK from *pseudomonas fluorescens* (2 g) followed by freshly distilled vinyl acetate (4 mL, 40 mmol) were added. The slurry was stirred 5 h at room temperature. NMR of the crude reaction mixture indicated that the ratio of acetate to alcohol was approximately 1:1. The mixture was stirred for 30 more minutes, filtered through celite and washed with pentane. Column chromatography afforded (S)-4-cyclo-hexyl-but-3-yn-2-ol (1.1 g, 99% yield based on 50% conversion) that was at least 98% *ee* according to Mosher's ester analysis.<sup>4</sup> It was consistent with the specific rotations of similar compounds prepared from the same method.<sup>3</sup>

<sup>1</sup>H NMR (400 MHz, CDCl<sub>3</sub>, δ): 4.53 (m, 1H), 2.42 – 2.30 (m, 1H), 1.9 – 1.2 (m, 10H), 1.43 (d, *J* = 6.5 Hz, 3H).

<sup>13</sup>C NMR (100 MHz, CDCl<sub>3</sub>, δ): 89.0, 82.3, 58.8, 32.8, 29.1, 26.0, 25.1.

IR (NaCl, thin film): 3333, 2931, 2854, 2240, 1449, 1158, 1078, 897.

HRMS-ESI (*m/z*): [M + Na]<sup>+</sup> calcd for C<sub>10</sub>H<sub>16</sub>O, 175.109; found, 175.109.

[α]<sub>D</sub><sup>20</sup> -23.0 ° (c 1.00, CHCl<sub>3</sub>)

Mosher's ester analysis: (+/-)-4-cyclohexyl-but-3-yn-2-ol was converted into a pair of diastereomers of (*R*)-Mosher's esters (DCC, DMAP, (*R*)-Mosher's acid, CH<sub>2</sub>Cl<sub>2</sub>)<sup>5</sup>. The methyl doublets (δ 1.50 and 1.56 ppm) of the two diastereomers were well resolved by <sup>1</sup>H NMR and were assigned according to the method of Mosher.<sup>4</sup>

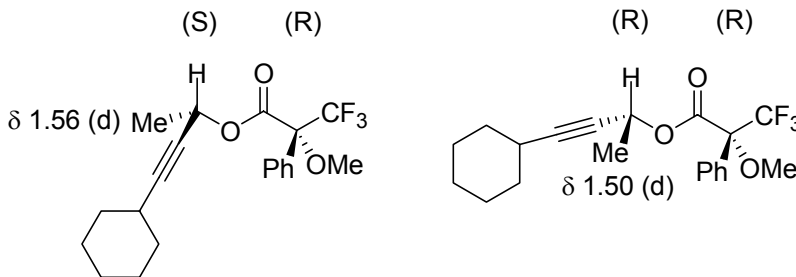

The enantiomerically-enriched alcohol was then converted to (*R*)-Mosher's ester, and a doublet was observed at  $\delta$  1.56 ppm. Therefore, 4-cyclo-hexyl-but-3-yn-2-ol prepared from lipase resolution had an absolute configuration of (*S*).

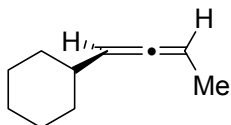

c. Preparation of (*aS*)-buta-1,2-dienyl-cyclohexane by the method of Myers<sup>6</sup> (**2b**). Triphenylphosphine (5 g, 15 mmol) was dissolved in THF (20 mL). The solution was cooled in a MeOH / ice bath, and diethylazodicarboxylate (DEAD) (2.4 mL, 15 mmol) was added to the solution over 1 min. The solution was stirred 10 min below -10 °C. (*S*)-4-cyclohexyl-but-3-yn-2-ol (1.52 g, 10 mmol) in THF (10 mL) was added. THF (5 mL) was used to rinse the rest of the alcohol into the reaction mixture. The mixture was stirred 10 min, and *o*-nitrobenzenesulfonyl- hydrazine<sup>7</sup> (3.3 g, 15 mmol in 20 mL THF) was added. The mixture was kept below 0 °C for 2 h and was allowed to warm to room temperature and stirred 16 h. The reaction was cooled to 0 °C, diluted with pentane (200 mL) and washed 10 times with ice cold water to remove THF. Column chromatography in pentane afforded (*aS*)-buta-1,2-dienyl-cyclohexane (0.95 g, 70% yield, 98% *ee* based on chiral GC analysis). The absolute configuration of the allene was determined<sup>6</sup> based on the absolute configuration of the alcohol and was consistent with Lowes-Brewster rule.<sup>8</sup> The spectral data are consistent with literature values.<sup>9</sup>

<sup>1</sup>H NMR (400 MHz, CDCl<sub>3</sub>,  $\delta$ ): 5.09 (m, 1H), 5.04 (m, 1H), 2.00 – 1.91 (m, 1H), 1.80 – 1.00 (m, 10H), 1.65 (dd, *J* = 3.4, 7.0 Hz, 3H).

<sup>13</sup>C NMR (100 MHz, CDCl<sub>3</sub>,  $\delta$ ): 203.7, 96.7, 86.5, 37.4, 33.3, 26.4, 26.3, 15.0.

IR (NaCl, thin film): 2924, 2852, 1965, 1448, 960, 869, 711.

HRMS-ESI (*m/z*): [*M* + Na]<sup>+</sup> calcd for C<sub>10</sub>H<sub>16</sub>, 136.125; found, 136.125.

$[\alpha]_D^{20} + 76.7^\circ$  (*c* 1.46, CHCl<sub>3</sub>)

Chiral GC analysis: (Chiraldex B-DA, 60 °C isotherm, 1.5 mL/min): *t<sub>R</sub>*(*aS*) = 21.1 min; *t<sub>R</sub>*(*aR*) = 22.6 min.

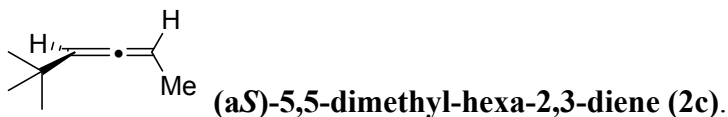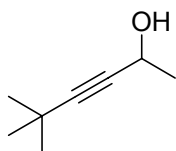

a. Preparation of (+/-)-5,5-dimethyl-hex-3-yn-2-ol. THF (80 mL) was cooled to -78 °C. *tert*-butylacetylene (7.35 mL, 60 mmol) was added. MeLi (56 mL, 90 mmol, 1.6 M in diethylether) was added via a syringe pump over 10 min. The mixture was stirred 1 h at -78 °C. Acetaldehyde (6.7 mL, 120 mmol) was added. The mixture was stirred at -78 °C for one more hour and warmed to room temperature. The reaction was cooled to 0 °C and quenched with water. The cold mixture was diluted with diethylether (150 mL) and washed two times with water. The ether solution was dried by MgSO<sub>4</sub> and was filtered through silica gel. The silica gel was washed with diethyl ether. The NMR of the crude reaction mixture indicated 5,5-dimethyl-hex-3-yn-2-ol along with some cyclotrimer of acetaldehyde. (53.4 mmol alcohol based on NMR integration, 89% yield). The crude product was used without further purification.

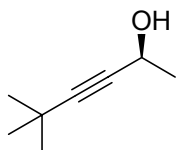

b. Preparation of (S)-5,5-dimethyl-hex-3-yn-2-ol by lipase resolution.

Prepared using the same lipase resolution procedure as described above (lipase, 4Å MS, vinylacetate, pentane, room temperature, 5.5 h. 88.5% isolated yield. > 98% *ee* based on chiral GC analysis and Mosher's ester analysis).

<sup>1</sup>H NMR (400 MHz, CDCl<sub>3</sub>, δ): 4.49 (q, *J* = 6.5 Hz, 1H), 2.1 (bs, 1H), 1.39 (d, *J* = 6.5 Hz, 3H), 1.19 (s, 9H).

<sup>13</sup>C NMR (100 MHz, CDCl<sub>3</sub>, δ): 92.9, 80.9, 68.1, 58.6, 31.2, 25.0.

IR (NaCl, thin film): 3336, 2971, 2237, 1363, 1263, 1125, 1050, 973, 882.

[α]<sub>D</sub><sup>20</sup> -27.3 ° (c 1.06, CHCl<sub>3</sub>)

Mosher's ester analysis: (+/-)-5,5-dimethyl-hex-3-yn-2-ol was converted into a pair of diastereomers of (*R*)-Mosher's esters (DCC, DMAP, (*R*)-Mosher's acid, CH<sub>2</sub>Cl<sub>2</sub>)<sup>5</sup>. The methyl doublets (δ 1.48 and 1.54 ppm) and *t*-Bu singlets (δ 1.19 and 1.21 ppm) of the two diastereomers were well resolved by <sup>1</sup>H NMR and were assigned according to the

method of Mosher.<sup>4</sup>

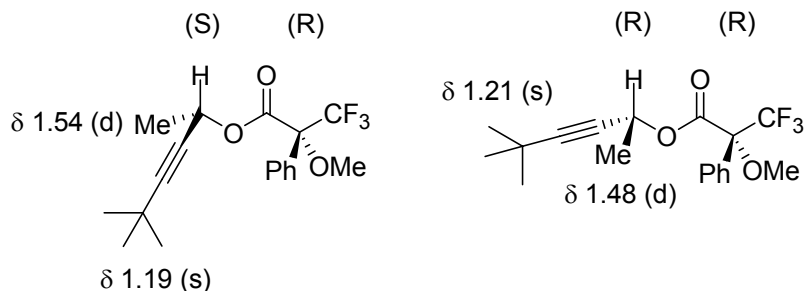

The enantiomerically-enriched alcohol was converted to (*R*)-Mosher's ester. A doublet was observed at  $\delta$  1.54 ppm, and a singlet was observed at  $\delta$  1.19 ppm. Therefore, 5,5-dimethyl-hex-3-yn-2-ol prepared from lipase resolution had an absolute configuration of (*S*).

Chiral GC analysis: (Chiraldex B-PH, 60 °C isotherm, 0.3 mL/min):  $t_R(S)$  = 69.0 min;  $t_R(R)$  = 72.3 min.

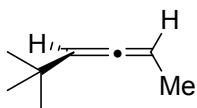

c. Preparation of (*aS*)-5,5-dimethyl-hexa-2,3-diene (**2c**). Prepared using the same method as described above for **2b**. After the removal of THF by an aqueous workup, the pentane solution was filtered through a pad of silica gel to remove most of the by-products. The pentane was removed by rotavap at atmospheric pressure, and the last traces of pentane were removed by fractional distillation. Finally, the product was separated from the crude mixture by distilling under high vacuum at room temperature, collecting in a cooled flask, affording 60% of (*aS*)-5,5-dimethyl-hexa-2,3-diene. The absolute configuration of the allene was assigned<sup>6</sup> based on the absolute configuration of the alcohol and was consistent with Lowes-Brewster rule.<sup>8</sup>

<sup>1</sup>H NMR (400 MHz, CDCl<sub>3</sub>,  $\delta$ ): 5.12 (quintet,  $J$  = 6.8 Hz, 1H), 5.06 (dq,  $J$  = 3.3, 6.42 Hz, 1H), 1.67 (dd,  $J$  = 3.3, 6.9 Hz, 3H), 1.04 (s, 9H).

<sup>13</sup>C NMR (100 MHz, CDCl<sub>3</sub>,  $\delta$ ): 202.1, 102.6, 87.4, 31.9, 30.4, 15.1.

IR (NaCl, thin film): 2962, 1962, 1462, 1363, 1192, 873, 725.

$[\alpha]_D^{20}$  +67.7° (c 1.24, CHCl<sub>3</sub>) (consistent with similar compounds<sup>10</sup>)

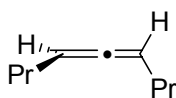

**(aS)-nona-4,5-diene (2a).** Prepared using the same method as **2b** and **2c** from (*S*)-non-5-yn-4-ol, which was prepared by lipase resolution using the procedure described above (60% yield from (*S*)-non-5-yn-4-ol, 95% *ee*). The absolute configuration was assigned by comparing the specific rotation of **2a** with the literature value <sup>11</sup> and is also consistent with the Lowes-Brewster rule.<sup>8</sup>

<sup>1</sup>H NMR (400 MHz, CDCl<sub>3</sub>, δ): 5.07 (m, 2H), 1.97 (m, 4H), 1.44 (sextet, *J* = 7.3 Hz, 4H), 0.94 (t, *J* = 7.3 Hz, 6H).

<sup>13</sup>C NMR (100 MHz, CDCl<sub>3</sub>, δ): 204.2, 90.8, 31.4, 22.7, 13.9.

IR (NaCl, thin film): 2960, 2931, 1963, 1464, 879.

[α]<sub>D</sub><sup>20</sup> +64.0 ° (c 1.00, CHCl<sub>3</sub>)

[α]<sub>D</sub><sup>20</sup> +84.7 ° (c 0.72, EtOH)

Literature<sup>11</sup> [α]<sub>D</sub><sup>20</sup> +80.0 ° (c 0.69, EtOH)

Chiral GC analysis: (Chiraldex B-PH, 35 °C isotherm, 0.1 mL/min): *t*<sub>R</sub>(*aR*) = 74.7 min; *t*<sub>R</sub>(*aS*) = 81.2 min.

### Nickel-catalyzed reductive couplings of allenes and aldehydes.

**General procedure.** A 25 mL round bottom flask and a stir bar were oven-dried and brought into a glove box. Ni(cod)<sub>2</sub> (28 mg, 0.1 mmol, 20 mol%) and NHC-IPr (78 mg, 0.2 mmol, 40 mol%) were added to the round bottom flask, the flask was sealed with a septum, and the sealed flask was brought out of the glove box and connected to an argon line. The catalyst mixture was dissolved in THF (7.5 mL) under argon and stirred 10 min at room temperature. The solution was cooled to -78 °C in a dry ice / acetone bath. After 10 min of cooling, triethylsilane (240 μL, 1.5 mmol, 300 mol%), *tert*-butyldimethylsilane (250 μL, 1.5 mmol, 300 mol%), or dimethylphenylsilane (233 μL, 1.5 mmol, 300 mol%), as specified below, was added in one portion. Next the aldehyde (1.5 mmol, 300 mol%) was added in one portion. The mixture was stirred 5 min at -78 °C. The allene (0.5 mmol, 100 mol%) was added to the reaction mixture in one portion. The reaction was kept in the dry ice / acetone bath and the bath was allowed to warm to room temperature over 6 h. The reaction was stirred an additional 12 h at room temperature. <sup>1</sup>H NMR of an aliquot of the crude (after filtering through a plug of silica) indicated the allylic alcohol was the



major coupling product along with minor impurities assigned as various homoallylic alcohols. The ratio of the allylic to homoallylic products was determined by the  $^1\text{H}$  NMR integration of spectrum of the crude mixture (Refer to **Table 1** for the ratio). THF and excess silane were removed under reduced pressure and the crude mixture was diluted in hexane. Purification via flash chromatography on silica afforded the allylic alcohol coupling product.

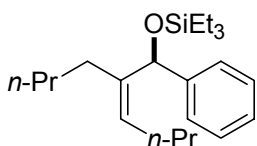

**(2-Butyl-1-phenyl-hex-2-enyloxy)-triethyl-silane (3a).** The reaction of (a*S*)-nona-4,5-diene (**2a**) (82  $\mu\text{L}$ , 0.5 mmol) and benzaldehyde (152  $\mu\text{L}$ , 1.5 mmol) with  $\text{Ni}(\text{cod})_2$ , NHC-IPr and triethylsilane in THF following the general procedure described above afforded **3a** in 77% isolated yield and 95% *ee* as determined by chiral HPLC. The absolute configuration of the stereocenter was determined by Mosher's ester analysis to be *R*. The olefin geometry was determined to be *Z* by a nOe experiment (see below).

$^1\text{H}$  NMR (500 MHz,  $\text{CDCl}_3$ ,  $\delta$ ): 7.16 – 7.40 (m, 5H); 5.76 (s, 1H); 5.24 (t,  $J = 7.3$  Hz, 1H); 2.27 (q,  $J = 7.5$  Hz, 2H); 2.02 (m, 1H); 1.74 (m, 1H); 1.51 (sextet,  $J = 7.5$  Hz, 2H); 1.14 – 1.34 (m, 4H); 1.01 (t,  $J = 6.7$  Hz, 3H); 0.97 (t,  $J = 7.6$  Hz, 9H); 0.81 (t,  $J = 7.0$  Hz, 3H); 0.64 (q,  $J = 7.9$  Hz).

$^{13}\text{C}$  NMR (100 MHz,  $\text{CDCl}_3$ ,  $\delta$ ): 144.5, 141.9, 128.0, 126.5, 125.6, 125.4, 71.3, 31.0, 30.4, 29.6, 23.6, 22.9, 14.34, 14.26, 7.11, 7.07.

IR (NaCl, thin film): 2957, 2875, 1458, 1063, 742, 698.

HRMS-ESI ( $m/z$ ):  $[\text{M} + \text{Na}]^+$  calcd for  $\text{C}_{22}\text{H}_{38}\text{OSi}$ , 369.258; found, 369.259.

$[\alpha]_D^{20}$  -75.2° (c 1.07,  $\text{CHCl}_3$ )

Chiral HPLC analysis: Analysis was performed on the corresponding free alcohol, obtained by the deprotection of **3a** (TBAF, THF): (Chiralcel OD, hexanes: 2-propanol, 99:1, 1.0 mL/min):  $t_R(S) = 9.7$  min;  $t_R(R) = 10.8$  min.

Mosher's ester analysis: (+/-)-**3a** was first converted into the free alcohol (TBAF, THF) and was then converted into a pair of diastereomers of (*R*)-Mosher's esters (DCC, DMAP, (*R*)-Mosher's acid,  $\text{CH}_2\text{Cl}_2$ )<sup>5</sup>. The vinyl triplets ( $\delta$  5.45 and 5.51 ppm) of the two

diastereomers were well resolved by  $^1\text{H}$  NMR and were assigned according to the method of Mosher.<sup>4</sup>

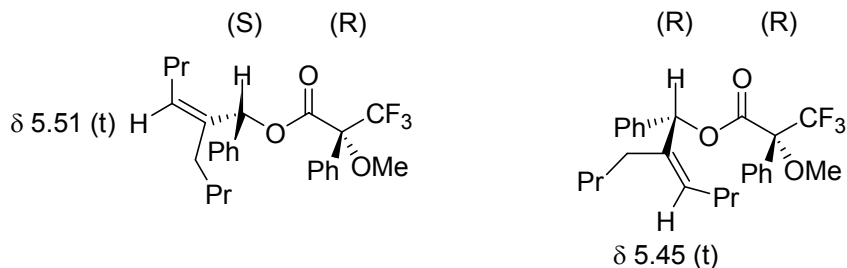

The enantiomerically-enriched **3a** was then converted to (*R*)-Mosher's ester using the same procedure.<sup>5</sup> The vinyl triplet was observed at  $\delta$  5.46 ppm. Therefore **3a** had an absolute configuration of (*R*).

NOE DIFF experiment: Pre-saturation of the carbinol proton of **3a** gave no nOe to the vinylic proton ( $\delta$  5.24 ppm), but 13% nOe was observed for the allylic protons indicated ( $\delta$  2.27 ppm). These results supported a *Z* olefin geometry.

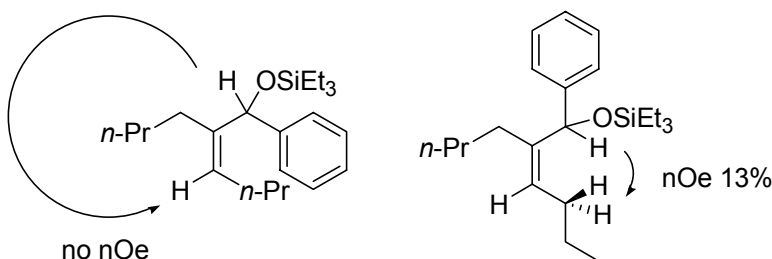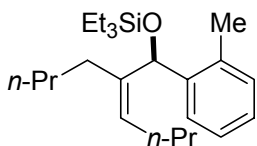

**(2-Butyl-1-*o*-tolyl-hex-2-enyloxy)-triethyl-silane (3b).**

The reaction of (*aS*)-nona-4,5-diene (**2a**) (82  $\mu\text{L}$ , 0.5 mmol) and *o*-tolualdehyde (174  $\mu\text{L}$ , 1.5 mmol) with  $\text{Ni}(\text{cod})_2$ , NHC-IPr and triethylsilane in THF following the general procedure described above afforded **3b** in 66% yield and 95% *ee* as determined by chiral HPLC. The absolute configuration of the stereocenter was assigned as *R* in analogy to **3a** and **3j** whose configurations were established by Mosher's ester analysis.

$^1\text{H}$  NMR (400 MHz,  $\text{CDCl}_3$ ,  $\delta$ ): 7.71 (bd,  $J = 7.6$  Hz, 1H), 7.21 (bt,  $J = 7.4$  Hz, 1H), 7.13

(dt,  $J = 1.4, 7.4$  Hz, 1H), 7.04 (bd,  $J = 7.4$  Hz, 1H), 5.75 (s, 1H), 5.20 (t,  $J = 6.6$  Hz, 1H), 2.38 – 2.22 (dq,  $J = 7.5, 14.8$  Hz, 2H), 2.20 (s, 3H), 1.91 (ddt,  $J = 1.1, 5.4, 10.32$  Hz, 1H), 1.65 (ddt,  $J = 1.0, 6.7, 9.8$  Hz, 1H), 1.49 (sextet,  $J = 6.9$  Hz, 2H), 1.16 (m, 3H), 1.03 (t,  $J = 5.6$  Hz, 4H), 0.94 (t,  $J = 8.0$  Hz, 9H), 0.77 (t,  $J = 7.1$  Hz, 3H), 0.60 (q,  $J = 7.5$  Hz, 6H).  
 $^{13}\text{C}$  NMR (100 MHz,  $\text{CDCl}_3$ ,  $\delta$ ): 142.2, 139.1, 134.2, 129.8, 126.9, 126.7, 126.5, 125.6, 69.1, 31.7, 30.6, 30.5, 23.5, 22.8, 19.6, 14.4, 14.2, 7.1, 5.2.  
 IR (NaCl, thin film): 2957, 2875, 1462, 1061, 1006, 744.  
 HRMS-ESI ( $m/z$ ):  $[\text{M} + \text{Na}]^+$  calcd for  $\text{C}_{23}\text{H}_{40}\text{OSi}$ , 383.274; found, 383.274.  
 $[\alpha]_D^{20}$  -75.2° (c 1.25,  $\text{CHCl}_3$ )

Chiral HPLC analysis: Analysis was performed on the corresponding free alcohol, obtained by the deprotection of **3b** (TBAF, THF) (Chiralcel OD, hexanes: 2-propanol, 99:1, 1.0 mL/min):  $t_R(S) = 11.4$  min;  $t_R(R) = 14.1$  min.

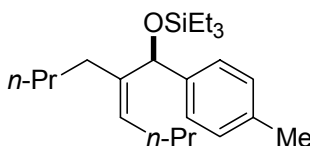

**(2-Butyl-1-*p*-tolyl-hex-2-enyloxy)-triethyl-silane (3c).** The reaction of (a*S*)-nona-4,5-diene (**2a**) (82  $\mu\text{L}$ , 0.5 mmol) and *p*-tolualdehyde (177  $\mu\text{L}$ , 1.5 mmol) with  $\text{Ni}(\text{cod})_2$ , NHC-IPr and triethylsilane in THF following the general procedure described above afforded **3c** in 74% yield and 95% enantiomeric excess as determined by chiral HPLC. The absolute configuration of the stereocenter was assigned as *R* in analogy to **3a** and **3j** whose configuration were established by Mosher's ester analysis.

$^1\text{H}$  NMR (500 MHz,  $\text{CDCl}_3$ ,  $\delta$ ): 7.24 (d,  $J = 7.9$  Hz, 2H), 7.11 (d,  $J = 7.6$  Hz, 2H), 5.74 (s, 1H), 5.22 (t,  $J = 7.0$  Hz, 1H), 2.34 (s, 3H), 2.27 (q,  $J = 7.3$  Hz, 2H), 2.03 (m, 1H), 1.74 (m, 1H), 1.50 (sextet,  $J = 7.3$  Hz, 2H), 1.38 – 1.18 (m, 4H), 1.00 (t,  $J = 7.3$  Hz, 3H), 0.97 (t,  $J = 7.9$  Hz, 9H), 0.82 (t,  $J = 7.0$  Hz, 3H), 0.63 (q,  $J = 7.9$  Hz, 6H).  
 $^{13}\text{C}$  NMR (125 MHz,  $\text{CDCl}_3$ ,  $\delta$ ): 142.0, 141.5, 136.0, 128.7, 125.6, 125.1, 71.2, 31.0, 30.3, 29.6, 23.6, 22.9, 21.3, 14.33, 14.28, 7.1, 5.1.  
 IR (NaCl, thin film): 2957, 2875, 1458, 1073, 1006, 741.  
 HRMS-ESI ( $m/z$ ):  $[\text{M} + \text{Na}]^+$  calcd for  $\text{C}_{23}\text{H}_{40}\text{OSi}$ , 383.274; found, 383.275.  
 $[\alpha]_D^{20}$  -83.8° (c 1.05,  $\text{CHCl}_3$ )

Chiral HPLC analysis: Analysis was performed on the corresponding free alcohol, obtained by the deprotection of **3c** (TBAF, THF): (Chiralcel OD, hexanes: 2-propanol,

100:0, 1.5 mL/min):  $t_R(R)$  = 37.7 min;  $t_R(S)$  = 49.1 min.

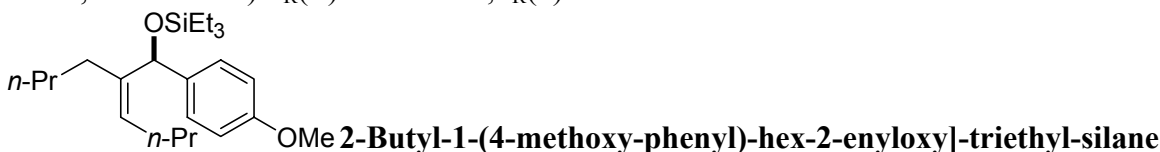

The reaction of (a*S*)-nona-4,5-diene (**2a**) (82  $\mu$ L, 0.5 mmol) and *p*-anisaldehyde (183  $\mu$ L, 1.5 mmol) with Ni(cod)<sub>2</sub>, NHC-IPr and triethylsilane in THF following the general procedure described above afforded **3d** in 75% yield and 95% enantiomeric excess as determined by chiral HPLC. The absolute configuration of the stereocenter was assigned as *R* in analogy to **3a** and **3j** whose configuration were established by Mosher's ester analysis

<sup>1</sup>H NMR (400 MHz, CDCl<sub>3</sub>,  $\delta$ ): 7.28 (d, *J* = 8.8 Hz, 2H), 6.87 (d, *J* = 8.4 Hz, 2H), 5.73 (s, 1H), 5.23 (t, *J* = 7.2 Hz, 1H), 3.82 (s, 3H), 2.26 (q, *J* = 7.6 Hz, 2H), 2.05 (m, 1H), 1.76 (m, 1H), 1.50 (sextet, *J* = 7.2 Hz, 2H), 1.40 – 1.15 (m, 4H), 1.01 (t, *J* = 7.2 Hz, 3H), 0.98 (t, *J* = 8.0 Hz, 9H), 0.84 (t, *J* = 7.0, 3H), 0.64 (q, *J* = 7.6 Hz, 6H).

<sup>13</sup>C NMR (100 MHz, CDCl<sub>3</sub>,  $\delta$ ): 158.3, 142.1, 136.7, 126.7, 125.1, 113.4, 71.0, 55.4, 31.0, 30.3, 29.6, 23.6, 22.9, 14.33, 14.28, 7.1, 5.1.

IR (NaCl, thin film): 2956, 2875, 1510, 1464, 1246, 1071, 741.

$[\alpha]_D^{20}$  -67.5° (c 1.14, CHCl<sub>3</sub>)

Chiral HPLC analysis: Analysis was performed on the corresponding free alcohol, obtained by the deprotection of **3d** (TBAF, THF): (Chiralcel OD, hexanes: 2-propanol, 99:1, 1.0 mL/min):  $t_R(R)$  = 14.3 min;  $t_R(S)$  = 17.0 min.

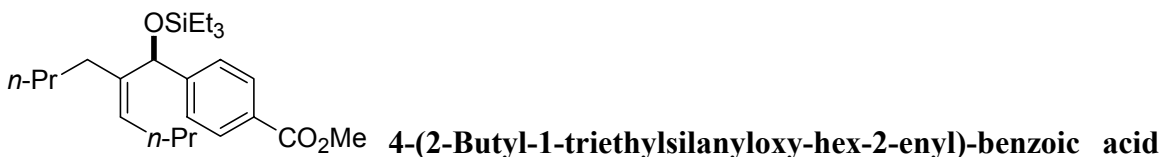

The reaction of (a*S*)-nona-4,5-diene (**2a**) (82  $\mu$ L, 0.5 mmol) and methyl 4-formylbenzoate (246  $\mu$ L, 1.5 mmol) with Ni(cod)<sub>2</sub>, NHC-IPr and triethylsilane in THF following the general procedure described above afforded **3e** in 56% yield (co-eluted with a small amount of homoallylic alcohol minor products) and 95% *ee* as determined by chiral HPLC. The absolute configuration of the stereocenter was assigned as *R* in analogy to **3a** and **3j** whose configuration were established by Mosher's ester analysis.

$^1\text{H}$  NMR (500 MHz,  $\text{CDCl}_3$ ,  $\delta$ ): 7.98 (d,  $J = 7.5$  Hz, 2H), 7.43 (d,  $J = 8.0$ , 2H), 5.79 (s, 1H), 5.26 (t,  $J = 7.0$  Hz, 1H), 3.90 (s, 3H), 2.28 (q,  $J = 7.1$  Hz, 2H), 1.95 (m, 1H), 1.72 (m, 1H), 1.55 (sextet,  $J = 7.0$  Hz, 2H), 1.30 – 1.10 (m, 4H), 1.01 (t,  $J = 7.0$  Hz, 3H), 0.96 (t,  $J = 7.6$  Hz, 9H), 0.79 (t,  $J = 7.3$  Hz, 3H), 0.63 (q,  $J = 7.9$  Hz, 6H).

$^{13}\text{C}$  NMR (125 MHz,  $\text{CDCl}_3$ ,  $\delta$ ): 167.4, 150.1, 141.3, 129.4, 128.5, 126.1, 125.6, 71.2, 52.2, 31.0, 30.4, 29.6, 23.5, 22.8, 14.3, 14.2, 7.06, 5.01.

IR (NaCl, thin film): 2956, 1727, 1277, 1075, 1018, 743.

HRMS-ESI ( $m/z$ ):  $[\text{M} + \text{Na}]^+$  calcd for  $\text{C}_{24}\text{H}_{40}\text{O}_3\text{Si}$ , 427.264; found, 427.266.

$[\alpha]_D^{20}$  -108.6° (c 1.28,  $\text{CHCl}_3$ )

Chiral HPLC analysis: Analysis was performed on the corresponding free alcohol, obtained by the deprotection of **3e** (TBAF, THF): (Chiralcel OD, hexanes: 2-propanol, 95:5, 1.0 mL/min):  $t_R(R) = 7.5$  min;  $t_R(S) = 19.7$  min.

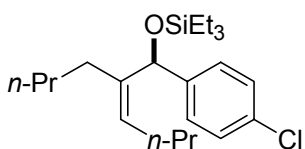

**[2-Butyl-1-(4-chloro-phenyl)-hex-2-enyloxy]-triethylsilane (3f)**. The reaction of (a*S*)-nona-4,5-diene (**2a**) (82  $\mu\text{L}$ , 0.5 mmol) and *p*-chlorobenzaldehyde solution (211  $\mu\text{L}$  aldehyde, 1.5 mmol in 1mL THF) with  $\text{Ni}(\text{cod})_2$ , NHC-IPr and triethylsilane in THF following the general procedure described above yielded **3f** in 65% yield and 1% of dechlorinated product, ie, **3a** (total 66% isolated yield, ratio of **3f** : **3a** in crude NMR is 94:6) and 95% *ee* as determined by chiral HPLC. The absolute configuration of the stereocenter was assigned as *R* in analogy to **3a** and **3j** whose configuration were established by Mosher's ester analysis.

$^1\text{H}$  NMR (400 MHz,  $\text{CDCl}_3$ ,  $\delta$ ): 7.4 – 7.2 (m, 4H), 5.73 (s, 1H), 5.26 (t,  $J = 7.0$  Hz, 1H), 2.27 (q,  $J = 7.3$  Hz, 2H), 2.00 (m, 1H), 1.72 (m, 1H), 1.51 (sextet,  $J = 7.4$  Hz, 2H), 1.40 – 1.10 (m, 4H), 1.02 (t,  $J = 7.3$  Hz, 3H), 0.97 (t,  $J = 7.8$  Hz, 9H), 0.83 (t,  $J = 7.3$  Hz, 3H), 0.64 (q,  $J = 8.0$  Hz, 6H).

$^{13}\text{C}$  NMR (100 MHz,  $\text{CDCl}_3$ ,  $\delta$ ): 143.2, 141.5, 132.2, 128.1, 127.1, 125.8, 70.9, 31.0, 30.4, 29.6, 23.6, 22.9, 14.3, 14.2, 7.1, 5.1.

IR (NaCl, thin film): 2957, 1488, 1074, 1014, 726.

HRMS-ESI ( $m/z$ ):  $[\text{M} + \text{Na}]^+$  calcd for  $\text{C}_{22}\text{H}_{37}\text{OCISi}$ , 403.219; found, 403.220.

$[\alpha]_D^{20}$  -88.9° (c 1.17,  $\text{CHCl}_3$ )

Chiral HPLC analysis: Analysis was performed on the corresponding free alcohol, obtained by the deprotection of **3f** (TBAF, THF): (Chiralcel OD-H, hexanes: 2-propanol, 99:1, 1.0 mL/min):  $t_R(S)$  = 7.4 min;  $t_R(R)$  = 8.6 min.

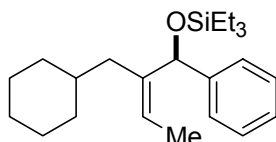

**(2-Cyclohexylmethyl-1-phenyl-but-2-enyloxy)-triethylsilane**

**(3g)**. The reaction of **2b** (68 mg, 0.5 mmol) and benzaldehyde (152  $\mu$ L, 1.5 mmol) with Ni(cod)<sub>2</sub>, NHC-IPr and triethylsilane in THF following the general procedure described above afforded **3g** in 76% isolated yield and 98% *ee* as determined by chiral HPLC. The absolute configuration of the stereocenter was assigned as *R* in analogy to **3a** and **3j** whose configuration were established by Mosher's ester analysis. The olefin geometry was determined to be *Z* by a nOe experiment (see below).

<sup>1</sup>H NMR (500 MHz, CDCl<sub>3</sub>,  $\delta$ ): 7.35 (d, *J* = 7.6 Hz, 2H), 7.29 (t, *J* = 7.3 Hz, 2H), 7.20 (t, *J* = 7.3 Hz, 1H), 5.79 (s, 1H), 5.30 (q, *J* = 7.0 Hz, 1H), 1.88 (d, *J* = 6.7 Hz, 3H), 1.80 (dd, *J* = 6.5, 14.5 Hz, 1H), 1.68 (dd, *J* = 7.0, 14.5 Hz), 1.64 – 1.54 (m, 6H), 1.28 – 1.18 (m, 1H), 1.12 – 1.00 (m, 3H), 0.97 (t, *J* = 7.9 Hz, 9H), 0.76 – 0.58 (m, 1H), 0.64 (q, *J* = 7.9 Hz, 6H).

<sup>13</sup>C NMR (125 MHz, CDCl<sub>3</sub>,  $\delta$ ): 144.6, 140.8, 128.0, 126.5, 125.6, 120.4, 70.9, 39.2, 36.1, 33.8, 33.5, 27.0, 26.7, 13.9, 7.1, 5.1.

IR (NaCl, thin film): 2954, 2921, 1449, 1091, 1064, 863, 737.

HRMS-ESI (*m/z*): [M + Na]<sup>+</sup> calcd for C<sub>23</sub>H<sub>38</sub>OSi, 381.258; found, 381.259.

$[\alpha]_D^{20}$  -58.0° (c 1.12, CHCl<sub>3</sub>)

Chiral HPLC analysis: Analysis was performed on the corresponding free alcohol, obtained by the deprotection of **3g** (TBAF, THF): (Chiralcel OD-H, hexanes: 2-propanol, 99:1, 1.0 mL/min):  $t_R(S)$  = 11.3 min;  $t_R(R)$  = 17.4 min.

NOE DIFF experiment: Pre-saturation of the carbinol proton ( $\delta$  5.79 ppm) of **3g** gave no nOe to the vinylic proton ( $\delta$  5.30 ppm). A 10.7% nOe to the methyl group, however, was observed. Similarly, pre-saturation of the methyl protons ( $\delta$  1.88 ppm) did not show any nOe to the cyclohexyl protons. A 4.5% nOe to the carbinol proton ( $\delta$  5.79 ppm), however, was observed. (see below).

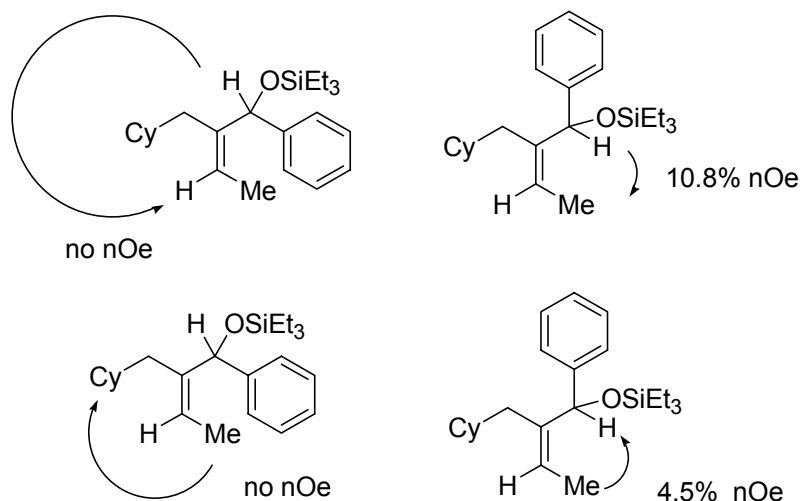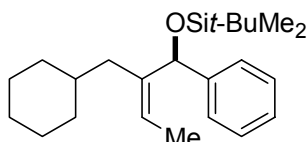

***tert*-Butyl-(2-cyclohexylmethyl-1-phenyl-but-2-enyloxy)-dimethyl-silane (**3h**)**. The reaction of **2b** (68 mg, 0.5 mmol) and benzaldehyde (152  $\mu$ L, 1.5 mmol) with Ni(cod)<sub>2</sub>, NHC-IPr and *tert*-butyldimethylsilane in THF following the general procedure described above afforded **3h** in 68% isolated yield and 98% *ee* as determined by chiral HPLC. The absolute configuration of the stereocenter was assigned as *R* in analogy to **3a** and **3j** whose configuration were established by Mosher's ester analysis.

<sup>1</sup>H NMR (400 MHz, CDCl<sub>3</sub>,  $\delta$ ): 7.40 – 7.10 (m, 5H), 5.80 (s, 1H), 5.31 (q, *J* = 7.0 Hz, 1H), 1.88 (d, *J* = 7.0 Hz, 3H), 1.77 (dd, *J* = 7.1, 14.8 Hz, 1H), 1.66 (dd, *J* = 7.0, 14.6 Hz, 1H), 1.57 (m, 6H), 1.30 – 0.50 (m, 5H), 0.96 (s, 9H), 0.07 (s, 3H), 0.06 (s, 3H).

<sup>13</sup>C NMR (125 MHz, CDCl<sub>3</sub>,  $\delta$ ): 144.5, 140.5, 127.9, 126.5, 125.6, 120.5, 71.1, 39.1, 35.9, 33.8, 33.5, 26.9, 26.6, 26.2, 18.6, 13.8, -4.6, -4.8.

IR (NaCl, thin film): 2926, 2854, 1449, 1252, 1090, 1064, 876, 835, 775, 698.

HRMS-ESI (*m/z*): [M + Na]<sup>+</sup> calcd for C<sub>23</sub>H<sub>38</sub>OSi, 381.258; found, 381.260.

[ $\alpha$ ]<sub>D</sub><sup>20</sup> -55.9° (c 1.11, CHCl<sub>3</sub>)

Chiral HPLC analysis: Analysis was performed **3h** without the deprotection of the silane protected alcohol: (Chiralcel OD-H, hexanes: 2-propanol, 100:0, 0.8 mL/min): *t*<sub>R</sub>(*R*) = 4.1

min;  $t_R(S)$  = 4.4 min.

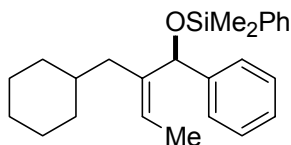

**(2-Cyclohexylmethyl-1-phenyl-but-2-enyloxy)-dimethyl-phenyl-silane (3i).** The reaction of **2b** (68 mg, 0.5 mmol) and benzaldehyde (152  $\mu$ L, 1.5 mmol) with  $\text{Ni}(\text{cod})_2$ , NHC-IPr and dimethylphenylsilane in THF following the general procedure described above afforded **3i** in 65% isolated yield and 98% *ee* as determined by chiral HPLC. The absolute configuration of the stereocenter was assigned as *R* in analogy to **3a** and **3j** whose configuration were established by Mosher's ester analysis.

$^1\text{H}$  NMR (500 MHz,  $\text{C}_6\text{D}_6$ ,  $\delta$ ): 7.66 – 7.61 (m, 2H), 7.49 (d,  $J$  = 7.6 Hz, 2H), 7.24 – 7.18 (m, 5H), 7.09 (t,  $J$  = 7.3 Hz, 1H), 5.89 (s, 1H), 5.25 (q,  $J$  = 6.7 Hz, 1H), 2.02 (dd,  $J$  = 7.0, 14.7 Hz, 1H), 1.93 (dd,  $J$  = 7.0, 14.7 Hz, 1H), 1.74 – 1.58 (m, 5H), 1.56 (d,  $J$  = 7.0 Hz, 3H), 1.35 (m, 1H), 1.10 (m, 3H), 0.82 – 0.60 (m, 2H), 1.57 (s, 3H), 1.55 (s, 3H).

$^{13}\text{C}$  NMR (100 MHz,  $\text{CDCl}_3$ ,  $\delta$ ): 144.0, 139.9, 138.2, 133.8, 129.7, 127.99, 127.96, 126.6, 125.6, 121.1, 71.4, 39.1, 36.1, 33.8, 33.5, 26.9, 26.6, 13.6, -0.9, -1.0.

IR (NaCl, thin film): 2921, 2850, 1449, 1428, 1251, 1118, 1088, 1057, 881, 829, 785, 737, 698.

HRMS-ESI ( $m/z$ ):  $[\text{M} + \text{Na}]^+$  calcd for  $\text{C}_{25}\text{H}_{34}\text{OSi}$ , 401.227; found, 401.227.

$[\alpha]_D^{20}$  -19.0° (c 1.00,  $\text{CHCl}_3$ )

Chiral HPLC analysis: Analysis was performed on the corresponding free alcohol, obtained by the deprotection of **3i** (TBAF, THF): (Chiralcel OD-H, hexanes: 2-propanol, 99:1, 1.0 mL/min):  $t_R(S)$  = 11.3 min;  $t_R(R)$  = 17.4 min.

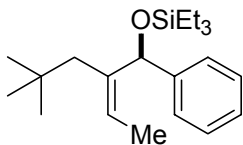

**Triethyl-(2-ethylidene-4,4-dimethyl-1-phenyl-pentyloxy)-silane (3j).** The reaction of **2c** (55 mg, 0.5 mmol) and benzaldehyde (152  $\mu$ L, 1.5 mmol) with  $\text{Ni}(\text{cod})_2$ , NHC-IPr and triethylsilane in THF following the general procedure described above afforded **3j** in 40% isolated yield (co-eluted with a homoallylic alcohol minor product) and 98% *ee* as determined by chiral HPLC. The absolute configuration of the stereocenter was determined by Mosher's ester analysis to be *R*.



$^1\text{H}$  NMR (500 MHz,  $\text{CDCl}_3$ ,  $\delta$ ): 7.34 (d,  $J = 7.6$  Hz, 2H), 7.29 (t,  $J = 7.3$  Hz, 2H), 7.20 (t,  $J = 7.3$  Hz, 1H), 5.72 (s, 1H), 5.46 (q,  $J = 7.0$  Hz, 1H), 1.91 (d,  $J = 7.0$  Hz, 3H), 1.86 (d,  $J = 14.6$  Hz, 1H), 1.77 (d,  $J = 14.6$  Hz, 1H), 0.95 (t,  $J = 7.9$  Hz, 9 H), 0.80 (s, 9H), 0.61 (qd,  $J = 2.4, 7.6$  Hz, 6H).

$^{13}\text{C}$  NMR (125 MHz,  $\text{CDCl}_3$ ,  $\delta$ ): 144.7, 140.5, 127.8, 126.4, 125.9, 122.9, 71.7, 43.3, 30.7, 22.7, 14.0, 6.9, 4.9.

IR (NaCl, thin film): 2954, 1463, 1091, 1065, 1006, 742.

$[\alpha]_D^{20}$   $-29.8^\circ$  (c 1.14,  $\text{CHCl}_3$ )

Chiral HPLC analysis: Analysis was performed on the corresponding free alcohol, obtained by the deprotection of **3j** (TBAF, THF): (Chiralcel OD-H, hexanes: 2-propanol, 99:1, 1.0 mL/min):  $t_R(S) = 10.4$  min;  $t_R(R) = 13.3$  min.

Mosher's ester analysis: (+/-)-**3j** was first converted into the free alcohol (TBAF, THF) and then into a pair of diastereomers of (*R*)-Mosher's esters (DCC, DMAP, (*R*)-Mosher's acid,  $\text{CH}_2\text{Cl}_2$ )<sup>5</sup>. The vinylic quartets ( $\delta$  5.63 and 5.70 ppm) and the *t*-Bu singlets ( $\delta$  0.76 and 0.80 ppm) of the two diastereomers were well resolved by  $^1\text{H}$  NMR and were assigned according to the method of Mosher.<sup>4</sup>

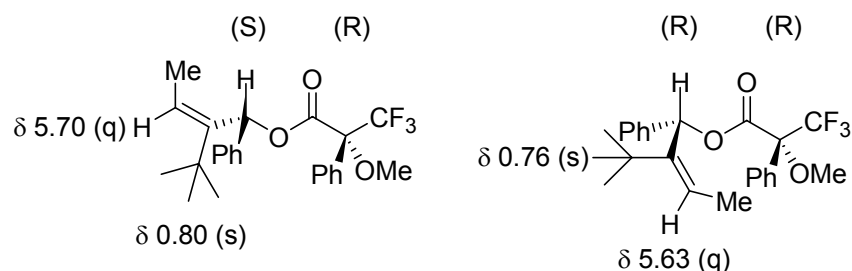

The enantiomerically-enriched **3j** was then converted to (*R*)-Mosher's ester using the same procedure.<sup>5</sup> The vinylic quartet was observed at  $\delta$  5.64 ppm, and the *t*-Bu singlet was observed at  $\delta$  0.75 ppm. Therefore, **3a** had an absolute configuration of (*R*).

### Deuterium label experiment.

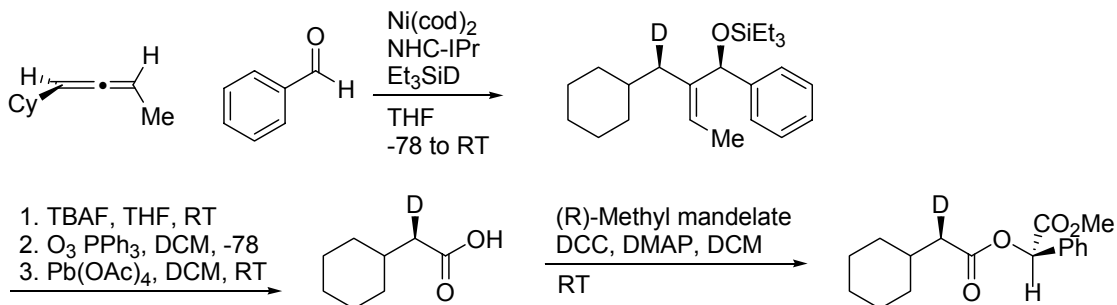

**<sup>2</sup>H-3g** (ie, **5a**) can be derivatized to a mandelic acid derivative **4** to determine the absolute configuration of the deuterated stereocenter using <sup>1</sup>H NMR by Parker's method.<sup>12</sup> The same mandelic acid derivative was also prepared by Fleming<sup>13</sup> and was also analyzed by the method of Parker.<sup>12</sup>

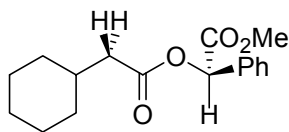

#### (2-Cyclohexyl-acetoxy)-phenylacetic acid methyl ester (**1H-4**).

Cyclohexylacetic acid (31.3 mg, 0.22 mmol), methyl-(*R*)-mandelate (33.2 mg, 0.2 mmol), dicyclohexylcarbodiimide (61.9 mg, 0.3 mmol) and 4-(dimethylamino)-pyridine (2.4 mg, 0.02 mmol) were mixed together and dissolved in anhydrous  $\text{CH}_2\text{Cl}_2$  (2 mL). The mixture was stirred 6 h at room temperature. The  $\text{CH}_2\text{Cl}_2$  solution was filtered through a plug of silica, the silica was washed with  $\text{CH}_2\text{Cl}_2$ . The filtrate was concentrated and column chromatography afforded **1H-4** (45.1 mg, 78% yield).

<sup>1</sup>H NMR (400 MHz,  $\text{C}_6\text{D}_6$ ,  $\delta$ ): 7.46 (d,  $J = 7.2$  Hz, 2H), 7.10 – 7.00 (m, 3H), 6.09 (s, 1H), 3.18 (s, 3H), 2.22 (dd,  $J = 7.1, 14.9$  Hz, 1H), 2.12 (dd,  $J = 7.1, 14.9$  Hz, 1H), 1.86 (m, 1H), 1.73 (m, 2H), 1.60 – 1.40 (m, 3H), 1.22 – 1.10 (m, 2H), 1.10 – 0.90 (m, 1H), 0.90 – 0.75 (m, 2H).

<sup>1</sup>H NMR (500 MHz,  $\text{CDCl}_3$ ,  $\delta$ ): 7.50 – 7.35 (m, 5H), 5.93 (s, 1H), 3.73 (s, 3H), 2.37 (dd,  $J = 7.0, 15.0$  Hz, 1H), 2.31 (dd,  $J = 7.0, 14.9$  Hz, 1H), 1.92 – 1.61 (m, 6H), 1.36 – 0.60 (m, 5H).

<sup>13</sup>C NMR (100 MHz,  $\text{CDCl}_3$ ,  $\delta$ ): 172.6, 169.6, 134.1, 129.4, 128.9, 127.7, 74.4, 52.7, 41.9, 35.0, 33.1, 26.3, 26.2.

IR (NaCl, thin film): 2925, 2852, 1760, 1743, 1450, 1216, 1159, 1114, 1044, 734.

$[\alpha]_D^{20}$  -90.3 ° (c 1.03, CHCl<sub>3</sub>)

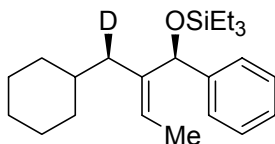

**(2-Cyclohexylmethyl-2-deuterio-1-phenyl-but-2-enyloxy)-triethyl-silane (5a / <sup>2</sup>H-3g)**. The reaction of **2b** (68 mg, 0.5 mmol) and benzaldehyde (152 μL, 1.5 mmol) with Ni(cod)<sub>2</sub>, NHC-IPr and triethylsilane-d (239 μL, 1.5 mmol) in THF, following the general procedure described above afforded **5a / <sup>2</sup>H-3g** (111 mg, 64% yield) in 98% *ee* as determined by chiral HPLC and >95:5 *dr* as determined by <sup>1</sup>H NMR.

<sup>1</sup>H NMR (500 MHz, CDCl<sub>3</sub>, δ): 7.35 (d, *J* = 8.0 Hz, 2H), 7.28 (t, *J* = 7.5 Hz, 2H), 7.19 (t, *J* = 7.5 Hz, 1H), 5.78 (s, 1H), 5.28 (q, *J* = 6.9 Hz, 1H), 1.87 (d, *J* = 7.0 Hz, 3H), 1.76 (bd, *J* = 6.6 Hz, 1H), 1.62 – 1.52 (m, 6H), 1.26 – 1.16 (m, 1H), 1.12 – 1.00 (m, 3H), 0.95 (t, *J* = 7.9 Hz, 9H), 0.76 – 0.58 (m, 1H), 0.62 (q, *J* = 7.9 Hz, 6H).

<sup>13</sup>C NMR (125 MHz, CDCl<sub>3</sub>, δ): 144.6, 140.7, 127.9, 126.5, 125.6, 120.4, 70.9, 38.8 (t, *J* = 19.5 Hz), 36.0, 33.8, 33.5, 26.9, 26.6, 13.9, 7.1, 5.1.

IR (NaCl, thin film): 2920, 1448, 1090, 1064, 731.

HRMS-ESI (*m/z*): [M + Na]<sup>+</sup> calcd for C<sub>23</sub>H<sub>37</sub>DOSi, 382.265; found, 382.264.

$[\alpha]_D^{20}$  -57.8 ° (c 1.02, CHCl<sub>3</sub>)

Chiral HPLC analysis: Analysis was performed on the deprotected **5a / <sup>2</sup>H-3g** (TBAF, THF): (Chiralcel OD-H, hexanes: 2-propanol, 99:1, 1.0 mL/min): *t<sub>R</sub>*(*S*) = 11.1 min; *t<sub>R</sub>*(*R*) = 17.3 min.

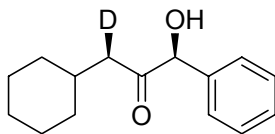

**3-Cyclohexyl-3-deuterio-1-hydroxy-1-phenyl-propan-2-one (5b)**. **5a / <sup>2</sup>H-3g** (96 mg, 0.27 mmol) was stirred 30 min in TBAF (1 mL, 0.5 mmol, 0.5M in THF). The mixture was diluted in diethylether and washed with water. The ether solution was dried in MgSO<sub>4</sub>, and the solvent was removed under reduced pressure. The crude was dissolved in CH<sub>2</sub>Cl<sub>2</sub> (5 mL) and was cooled to -78 °C. Ozone was bubbled through the solution for 20 min, and the solution turned blue. After purging with oxygen

(2 min) triphenylphosphine (157 mg, 0.6 mmol in 5 mL CH<sub>2</sub>Cl<sub>2</sub>) was added in one portion at -78 °C, stirred 5 min, and warmed to room temperature. CH<sub>2</sub>Cl<sub>2</sub> was removed under reduced pressure. Column chromatography first with 20% CH<sub>2</sub>Cl<sub>2</sub> / hexane removed triphenylphosphine. A gradient of 10 – 20 % EtOAc / Hexane afforded **5b** (62 mg, 99% yield) in > 95:5 *dr* as determined by <sup>1</sup>H NMR.

<sup>1</sup>H NMR (400 MHz, CDCl<sub>3</sub>, δ): 7.40 – 7.27 (m, 5H), 5.04 (d, *J* = 4.4 Hz, 1H), 4.43 (d, *J* = 4.5 Hz, 1H), 2.14 (dt, *J* = 2.0, 6.9 Hz, 1H), 1.90 – 0.55 (m, 11H).

<sup>13</sup>C NMR (100 MHz, CDCl<sub>3</sub>, δ): 209.3, 138.1, 129.1, 128.8, 127.7, 80.2, 45.2 (t, *J* = 19.0 Hz), 34.0, 33.2, 26.2, 26.1, 26.0.

IR (NaCl, thin film): 3458, 2923, 2851, 1711, 1450, 756, 670.

[α]<sub>D</sub><sup>20</sup> +231.7 ° (c 1.23, CHCl<sub>3</sub>)

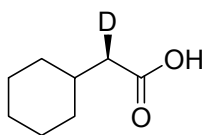

**2-Cyclohexyl-(2R)-deuterio-acetic acid (5c).** A 7 mL glass vial was

charged with **5b** (60 mg, 0.26 mmol) and lead tetraacetate (115 mg, 0.26 mmol). The vial was purged with nitrogen, CH<sub>2</sub>Cl<sub>2</sub> (2.5 mL, saturated with nitrogen) was added. The reaction mixture was stirred 8 h at room temperature, and the CH<sub>2</sub>Cl<sub>2</sub> solution was passed through a dry silica gel column (purged with argon) and eluted with CH<sub>2</sub>Cl<sub>2</sub> (saturated with argon) under argon to remove benzaldehyde and other low polarity byproducts. **5c** and a minor impurity were eluted with 30% ethylacetate / hexane. Column chromatography with a gradient of 5% - 30% EtOAc / hexane afforded **5c** (14 mg, 38% yield).

<sup>1</sup>H NMR (400 MHz, CDCl<sub>3</sub>, δ): 12.2 – 11.0 (bs, 1H), 2.21 (bd, *J* = 6.5 Hz, 1H), 1.85 – 1.65 (m, 6H), 1.40 – 0.80 (m, 5H).

<sup>13</sup>C NMR (100 MHz, CDCl<sub>3</sub>, δ): 180.0, 41.8 (t, *J* = 19.5 Hz), 34.8, 33.2, 33.1, 26.3, 26.2.

IR (NaCl, thin film): 2925, 2852, 1705, 1414, 1295.

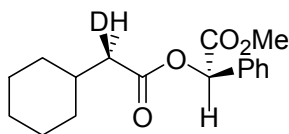

**(2-Cyclohexyl-(2R)-2-deuterio-acetoxy)-phenyl-acetic acid methyl ester (4).** **5c** (12 mg, 0.084 mmol), methyl-(*R*)-mandelate (21 mg, 0.09 mmol), dicyclohexylcarbodiimide (26 mg, 0.126 mmol), 4-(dimethyl)-aminopyridine (2 mg, 0.016 mmol) was dissolved in CH<sub>2</sub>Cl<sub>2</sub> (1.5 mL) and stirred 12 h at room temperature. The crude reaction mixture was filtered through a plug of silica, and the silica was washed with CH<sub>2</sub>Cl<sub>2</sub>. Column chromatography in 1% - 5% EtOAc / hexane afforded **4** (15.6 mg, 52% yield). <sup>1</sup>H NMR indicated slight erosion of *dr* (>90:10) at the deuterated stereocenter as compared to **5a** / **<sup>2</sup>H-3g** before derivatization to **4**. The deuterated stereocenter was assigned to be of the *R* configuration, according to the method of Parker,<sup>12</sup> and the analysis was consistent with Fleming's result<sup>13</sup>.

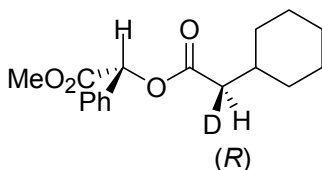

(Refer to <sup>1</sup>H NMRs of **<sup>1</sup>H-4**, **4** and **5d** for chemical shifts).

<sup>1</sup>H NMR (400 MHz, C<sub>6</sub>D<sub>6</sub>, δ): 7.48 (d, *J* = 6.9 Hz, 2H), 7.07 (t, *J* = 6.0 Hz, 2H), 7.03 (t, *J* = 7.4 Hz, 1H), 6.10 (s, 1H), 3.18 (s, 3H), 2.20 (dt, *J* = 1.7, 6.9 Hz, 1H), 1.92 – 1.80 (m, 1H), 1.80 – 1.68 (m, 2H), 1.61 – 1.42 (m, 3H), 1.22 – 1.07 (m, 2H), 1.07 – 0.91 (m, 1H), 0.90 – 0.75 (m, 2H).

<sup>1</sup>H NMR (400 MHz, CDCl<sub>3</sub>, δ): 7.50 – 7.40 (m, 2H), 7.44 – 7.37 (m, 3H), 5.93 (s, 1H), 3.73 (s, 3H), 2.35 (bd, *J* = 6.9 Hz, 1H), 1.90 – 1.60 (m, 6H), 1.55 – 0.90 (m, 5H).

<sup>13</sup>C NMR (125 MHz, CDCl<sub>3</sub>, δ): 172.7, 169.6, 134.1, 129.4, 129.0, 127.8, 74.4, 52.8, 41.6 (t, *J* = 20.0 Hz), 35.0, 33.11, 33.08, 26.3, 26.2.

IR (NaCl, thin film): 2924, 2851, 1760, 1743, 1450, 1436, 1216, 1163.

[α]<sub>D</sub><sup>20</sup> +112.0 ° (c 1.25, CHCl<sub>3</sub>)

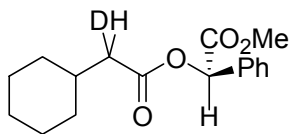

**(2R)-(2-Cyclohexyl-(2)-deuterio-acetoxy)-phenyl-acetic acid methyl ester and (2S)-(2-Cyclohexyl-(2)-deuterio-acetoxy)-phenyl-acetic acid methyl ester (5d).** Prepared using the same method as **4** except that (+/-)-**2b** was used to give a mixture of 1:1 diastereomers of **5d**.

<sup>1</sup>H NMR (400 MHz, C<sub>6</sub>D<sub>6</sub>, δ): 7.48 (d, *J* = 7.2 Hz, 2H), 7.07 (t, *J* = 7.0 Hz, 2H), 7.04 (t, *J* = 7.1 Hz, 1H), 6.11 (s, 2H), 3.18 (s, 6H), 2.20 (dt, *J* = 1.8, 6.9 Hz, 1H), 2.12 (dt, *J* = 1.8, 7.1 Hz, 1H), 1.92 – 1.80 (m, 1H), 1.80 – 1.68 (m, 2H), 1.61 – 1.42 (m, 3H), 1.22 – 1.07 (m, 2H), 1.07 – 0.91 (m, 1H), 0.90 – 0.75 (m, 2H).

<sup>1</sup>H NMR (400 MHz, CDCl<sub>3</sub>, δ): 7.50 – 7.40 (m, 2H), 7.44 – 7.37 (m, 3H), 5.93 (s, 1H), 3.73 (s, 3H), 2.35 (dt, *J* = 1.9, 6.9 Hz, 1H), 2.30 (bd, *J* = 1.8, 7.0 Hz, 1H), 1.90 – 1.60 (m, 6H), 1.55 – 0.90 (m, 5H).

<sup>13</sup>C NMR (125 MHz, CDCl<sub>3</sub>, δ): 172.7, 169.6, 134.1, 129.4, 129.0, 127.8, 74.4, 52.8, 41.6 (t, *J* = 20.0 Hz), 35.0, 33.11, 33.08, 26.3, 26.2.

IR (NaCl, thin film): 2923, 1850, 1760, 1742, 1215, 1163.

## References

1. Arduengo, A. J., III; Krafczyk, R.; Schmutzler, R. *Tetrahedron* **1999**, 55, 14523–14534.
2. Finholt, A. E.; Bond, A. C., Jr.; Wilzboch, K. E.; Schlessinger, H. I. *J. Am. Chem. Soc.* **1947**, 69, 2692–2696.
3. Burgess, K.; Jennings, L. D. *J. Am. Chem. Soc.* **1991**, 113, 6129–6139.
4. (a) Dale, J. A.; Dull, D. L.; Mosher, H. S. *J. Org. Chem.* **1969**, 34, 2543–2549. (b) Dale, J. A.; Mosher, H. S. *J. Am. Chem. Soc.* **1973**, 95, 512–519.
5. Yakelis, N. A.; Roush, W. R. *J. Org. Chem.* **2003**, 68, 3838–3843.
6. (a) Myers, A. G.; Zheng, B. *J. Am. Chem. Soc.* **1996**, 118, 4492–4493. (b) Myers, A. G.; Zheng, B. *Org. Synth., Coll. Vol. X*, 165.
7. Myers, A. G.; Zheng, B.; Movassaghi, M. *J. Org. Chem.* **1997**, 62, 7507.
8. Eliel, E. L.; Wilen, S. H.; Mander, L. N. *Stereochemistry of Organic Compounds*; Wiley & Sons: New York, **1994**; pp 1091..
9. Danheiser, R. L.; Choi, Y. M.; Menichincheri, M.; Stoner, E. J. *J. Org. Chem.* **1993**, 58, 322–327.
10. Pasto, D. J.; Brophy, J. E. *J. Org. Chem.* **1991**, 56, 4554–4556.
11. Michael, F. E.; Duncan, A. P.; Sweeney, Z. K.; Bergman, R. G. *J. Am. Chem. Soc.* **2003**, 125, 7184–7185.
12. (a) Brown, J. M.; Parker, D. *Tetrahedron Lett.* **1981**, 22, 2815–2818. (b) Parker, D. *J. Chem. Soc., Perkin Trans. 2* **1983**, 83–88.
13. Fleming, I.; Jones, G. R.; Kindon, N. D.; Landais, Y.; Leslie, C. P.; Morgan, I. T.; Peukert, S.; Sarkar, A. K. *J. Chem. Soc., Perkin Trans. 1*. **1996**, 1171–1196.

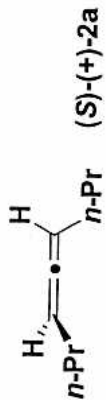

Current Data Parameters  
 NAME 8-25-2004-SN04  
 EXPNO 1  
 PROCNO 1

F2 - Acquisition Parameters

Date\_ 20040825  
 Time 22.03  
 INSTRUM spect  
 PROBHD 5mm BBO BB-1  
 PULPROG zg30  
 TD 65536  
 SOLVENT CDCl3  
 NS 16  
 DS 2  
 SWH 8278.146 Hz  
 FIDRES 0.126314 Hz  
 AQ 3.9584243 sec  
 RG 45.3  
 DW 60.400 usec  
 DE 6.00 usec  
 TE 300.0 K  
 D1 1.0000000 sec

===== CHANNEL f1 =====

NUC1 1H  
 P1 7.90 usec  
 PL1 0.00 dB  
 SF01 400.1324710 MHz

F2 - Processing parameters

SI 32768  
 SF 400.1300059 MHz  
 WDW EM  
 SSB 0  
 LB 0.30 Hz  
 GB 0  
 PC 1.00

1D NMR plot parameters

CX 20.00 cm  
 F1P 10.568 ppm  
 F1 4228.52 Hz  
 F2P -0.621 ppm  
 F2 -248.62 Hz  
 PPMCM 0.55946 ppm/cm  
 HZCM 223.85716 Hz/cm

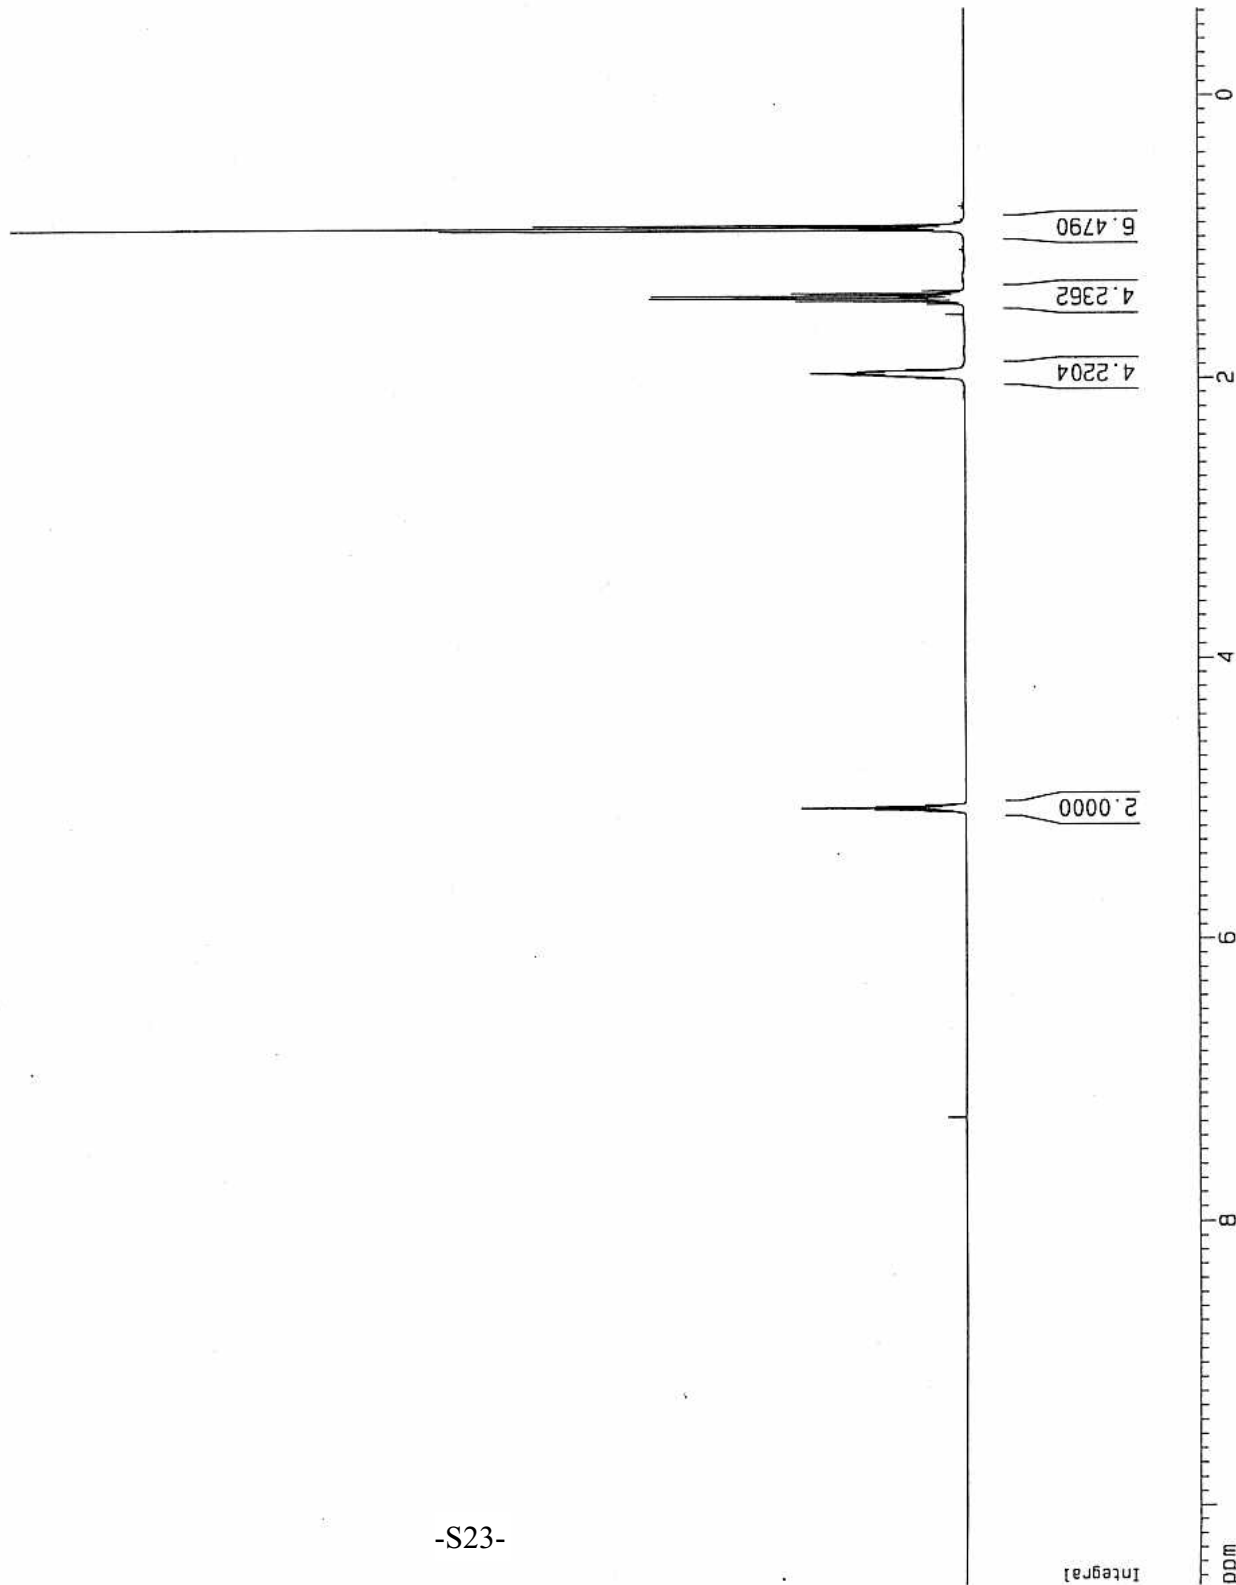

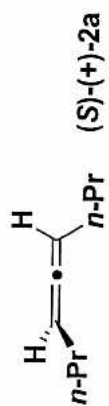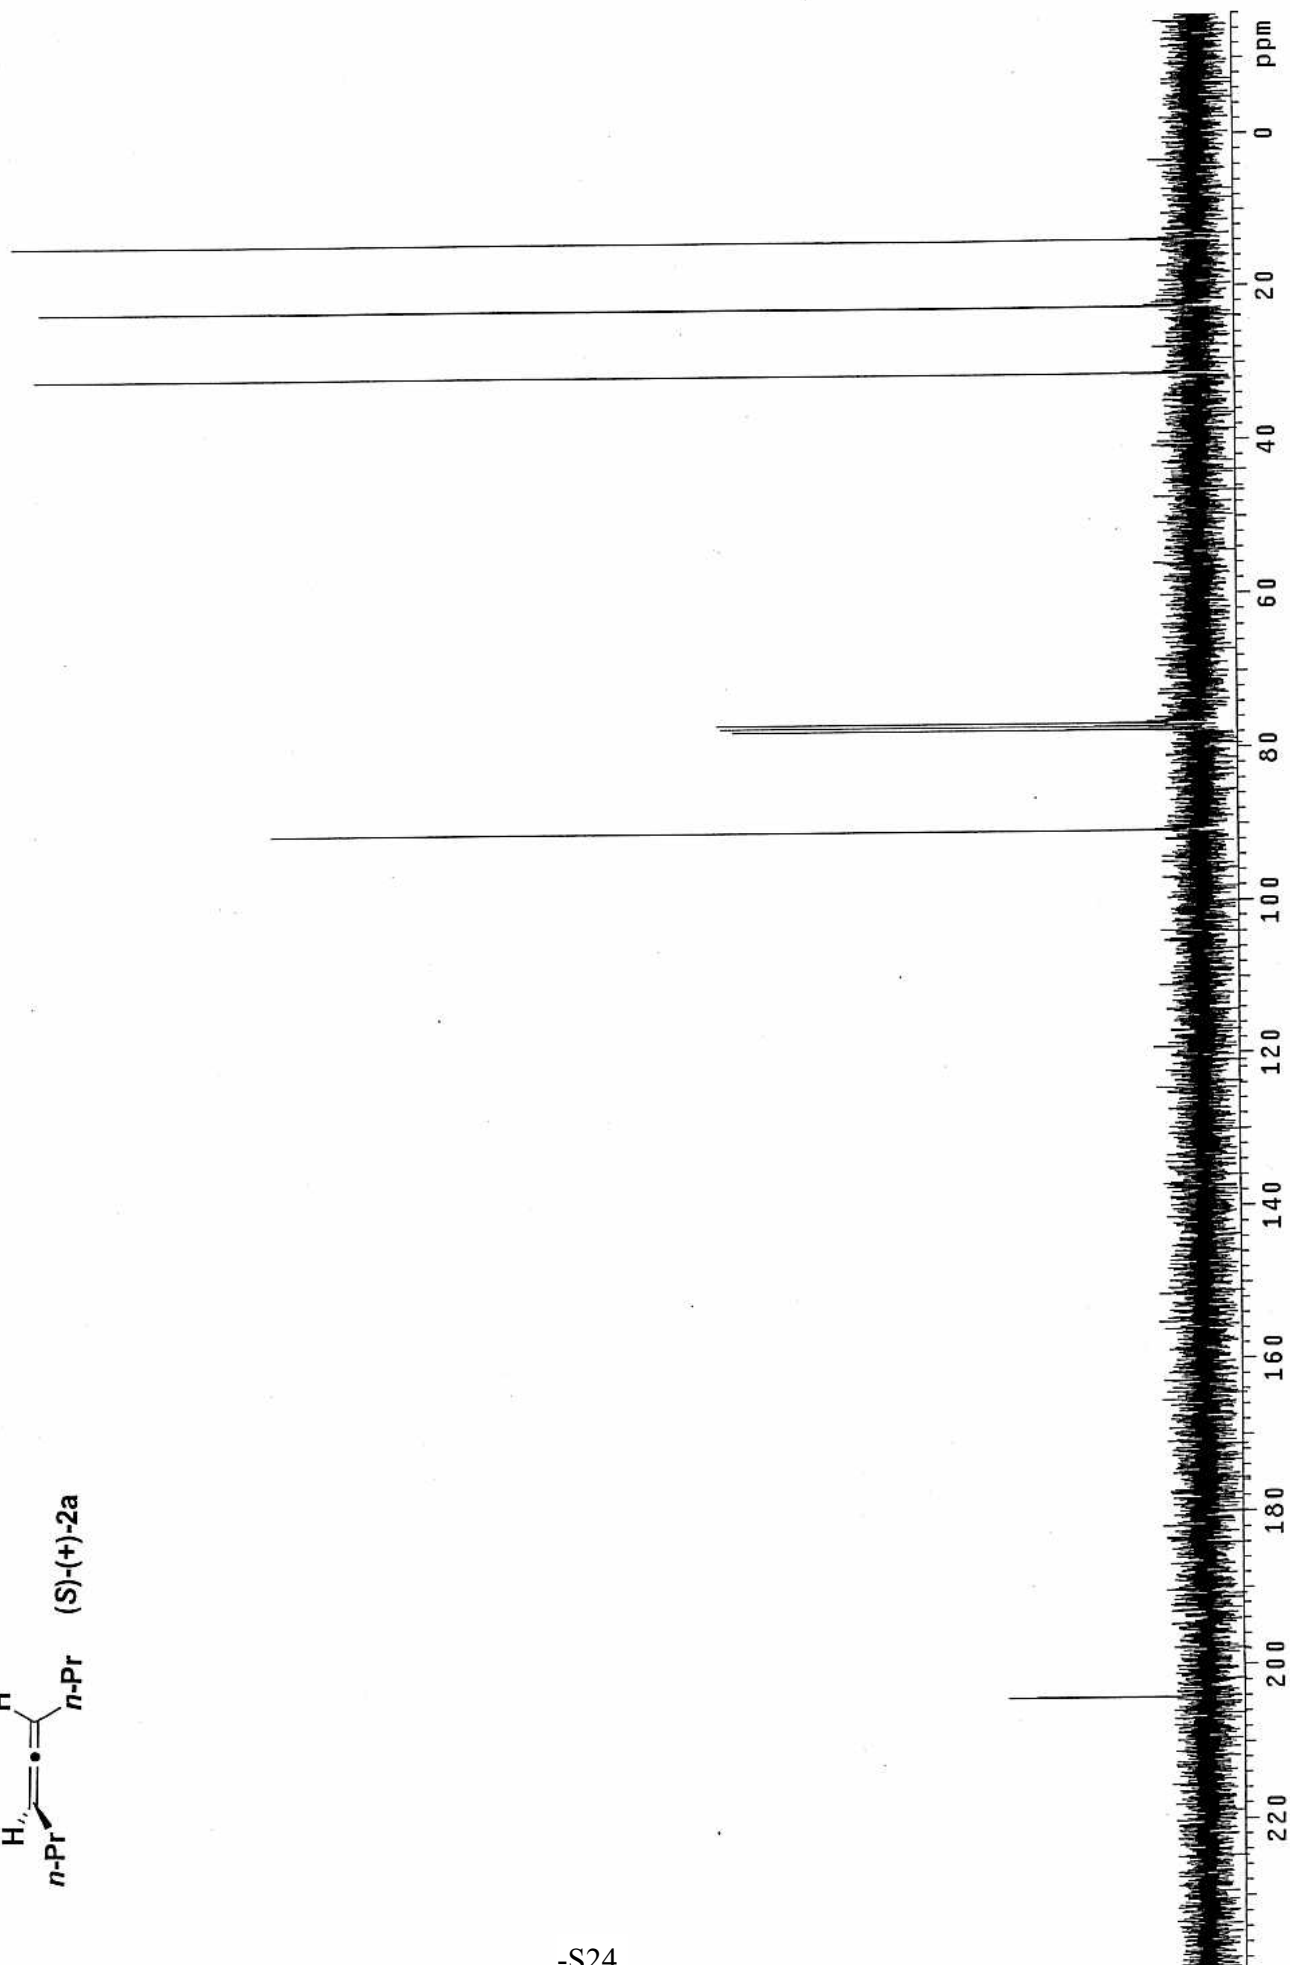



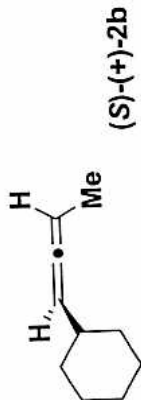

-S25-

Current Data Parameters  
 NAME SN491-H  
 EXPNO 2  
 PROCNO 1

F2 - Acquisition Parameters  
 Date\_ 20050222  
 Time 15.39  
 INSTRUM spect  
 PROBHD 5 mm QNP 1H/1  
 PULPROG zg30  
 TD 65536  
 SOLVENT CDCl3  
 NS 16  
 DS 2  
 SWH 8278.146 Hz  
 FIDRES 0.126314 Hz  
 AQ 3.9584243 sec  
 RG 228.1  
 DW 60.400 usec  
 DE 6.00 usec  
 TE 294.8 K  
 D1 1.00000000 sec  
 MCREST 0.00000000 sec  
 MCWRK 0.01500000 sec

===== CHANNEL f1 =====  
 NUC1 1H  
 P1 9.88 usec  
 PL1 3.00 dB  
 SF01 400.1324710 MHz

F2 - Processing parameters  
 SI 32768  
 SF 400.1300054 MHz  
 WDW EM  
 SSB 0  
 LB 0.30 Hz  
 GB 0  
 PC 1.00

10' NMR plot parameters  
 CX 20.00 cm  
 CY 12.50 cm  
 F1P 11.000 ppm  
 F1 4401.43 Hz  
 F2P 0.000 ppm  
 F2 0.00 Hz  
 PPMCM 0.55000 ppm/cm  
 HZCM 220.07150 Hz/cm

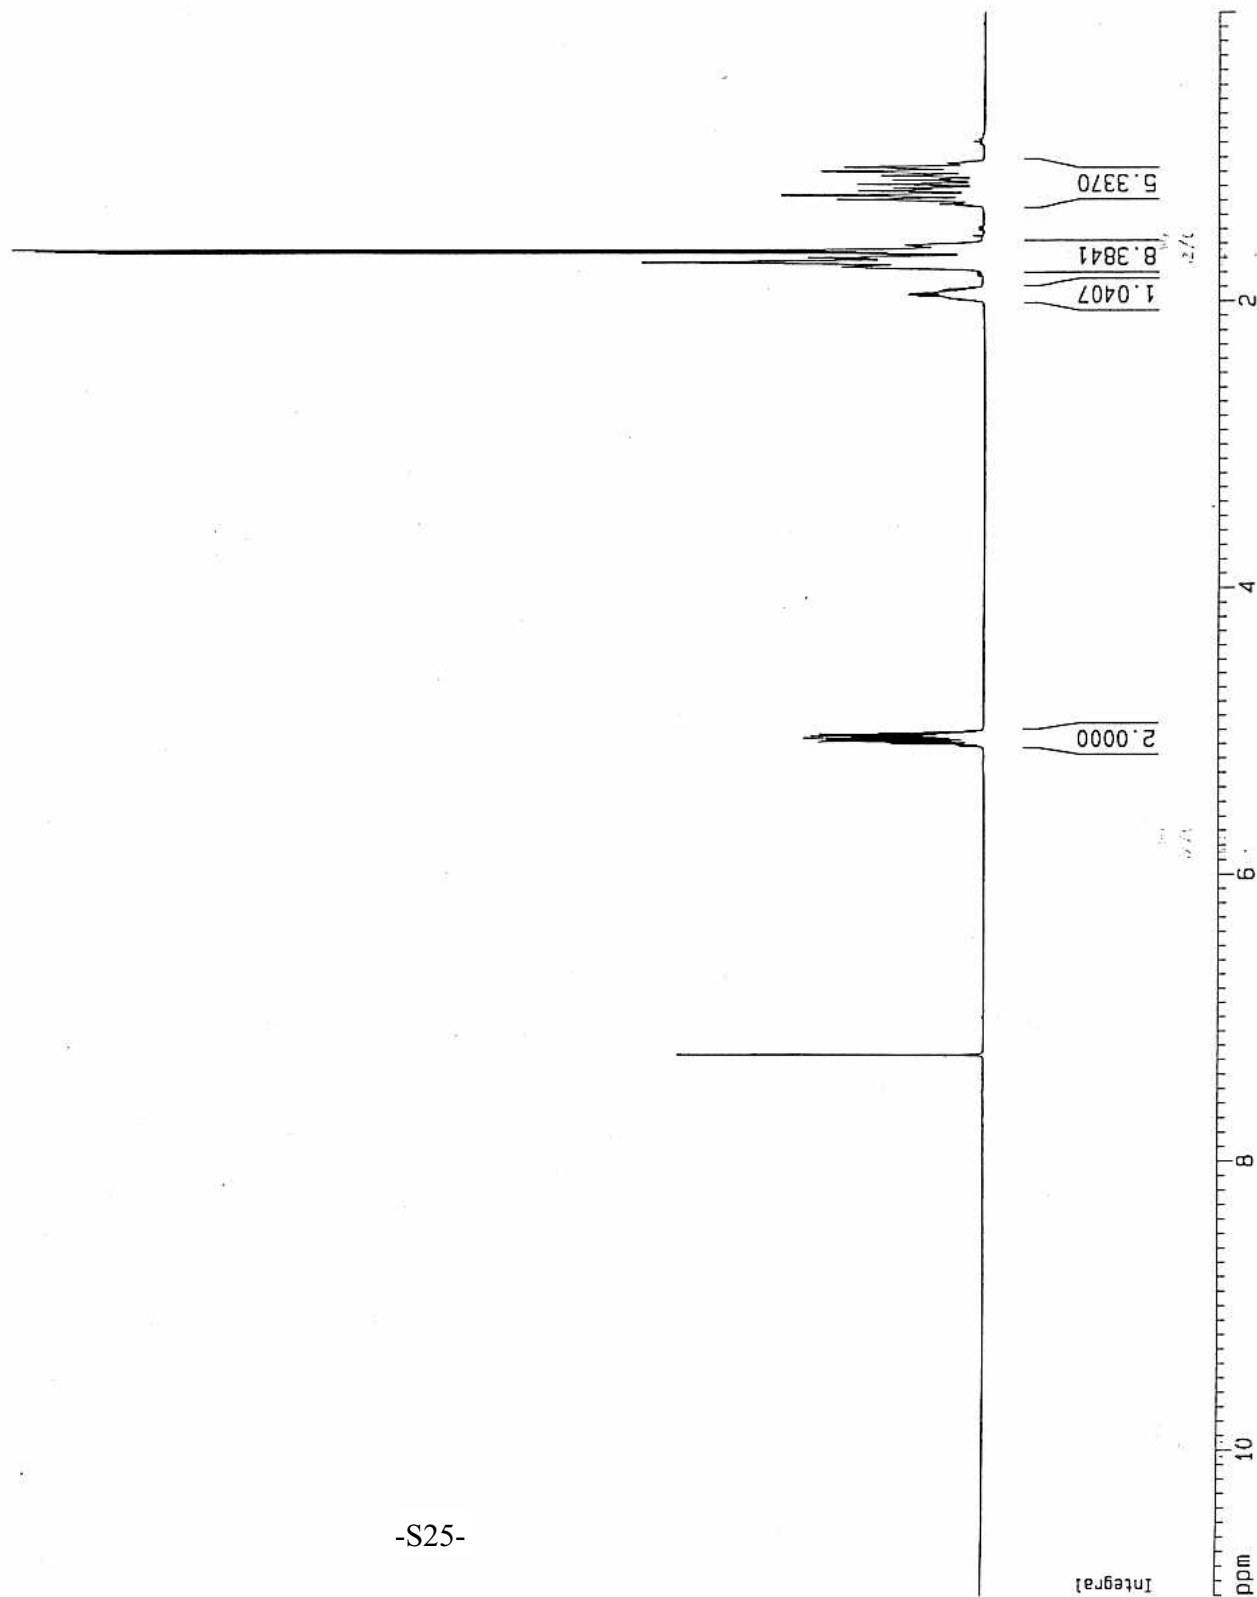

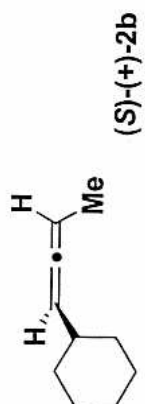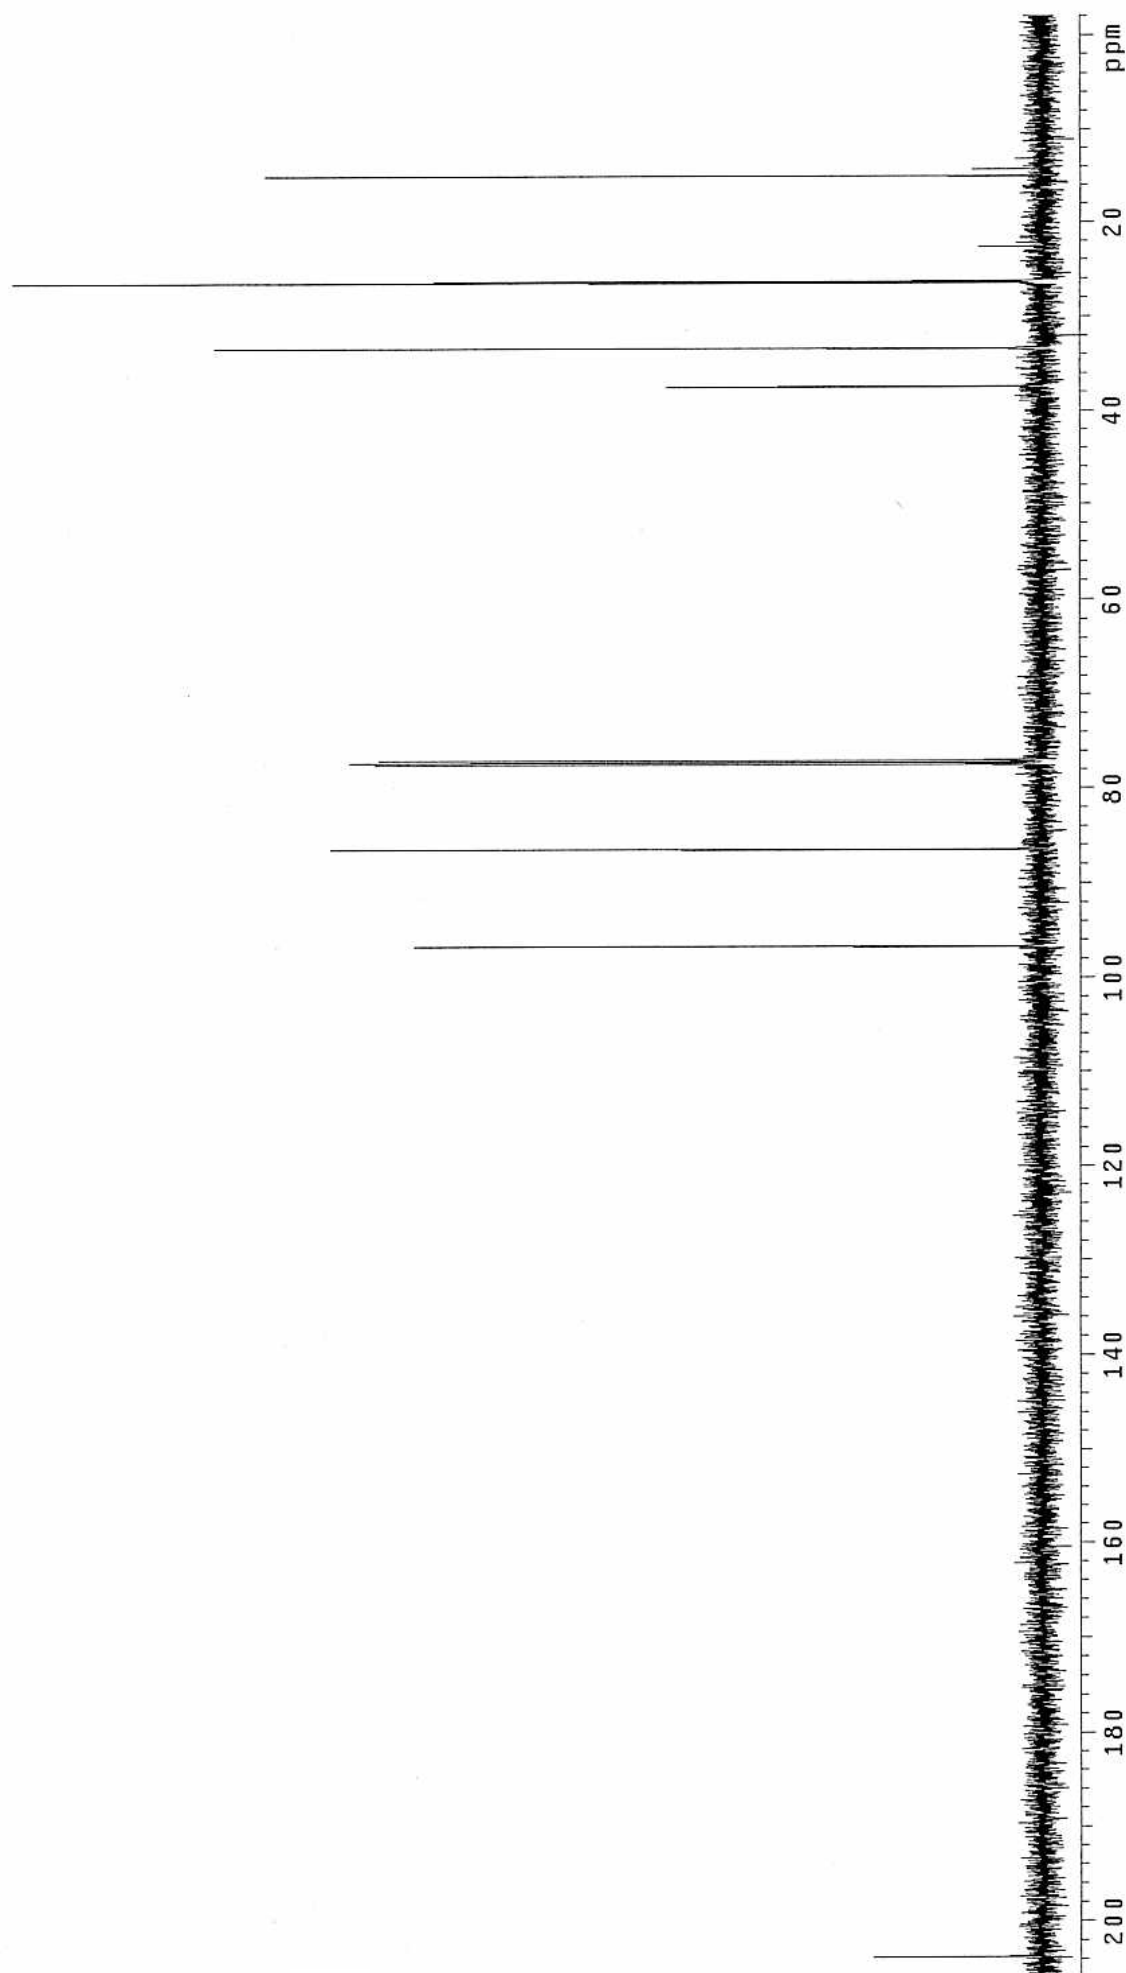

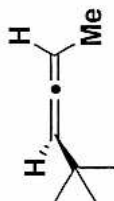

(S)-(+)-2c  
(with residual pentane)

Current Data Parameters  
NAME SN490-H  
EXPNO 2  
PROCNO 1

F2 - Acquisition Parameters  
Date\_ 20050222  
Time 22.01  
INSTRUM spect  
PROBHD 5 mm QNP 1H/1  
PULPROG zg30  
TD 65536  
SOLVENT CDCl3  
NS 16  
DS 2  
SWH 8278.146 Hz  
FIDRES 0.126314 Hz  
AQ 3.9584243 sec  
RG 80.6  
DW 60.400 usec  
DE 6.00 usec  
TE 294.8 K  
D1 1.00000000 sec  
MCREST 0.00000000 sec  
MCWAK 0.01500000 sec

===== CHANNEL f1 =====  
NUC1 1H  
P1 9.88 usec  
PL1 3.00 dB  
SF01 400.1324710 MHz

F2 - Processing parameters  
SI 32768  
SF 400.1300054 MHz  
WDW EM  
SSB 0  
LB 0.30 Hz  
GB 0  
PC 1.00

1D NMR plot parameters  
CX 20.00 cm  
CY 12.50 cm  
F1P 10.000 ppm  
F1 4001.30 Hz  
F2P 0.000 ppm  
F2 0.00 Hz  
PPMCM 0.50000 ppm/cm  
HZCM 200.06500 Hz/cm

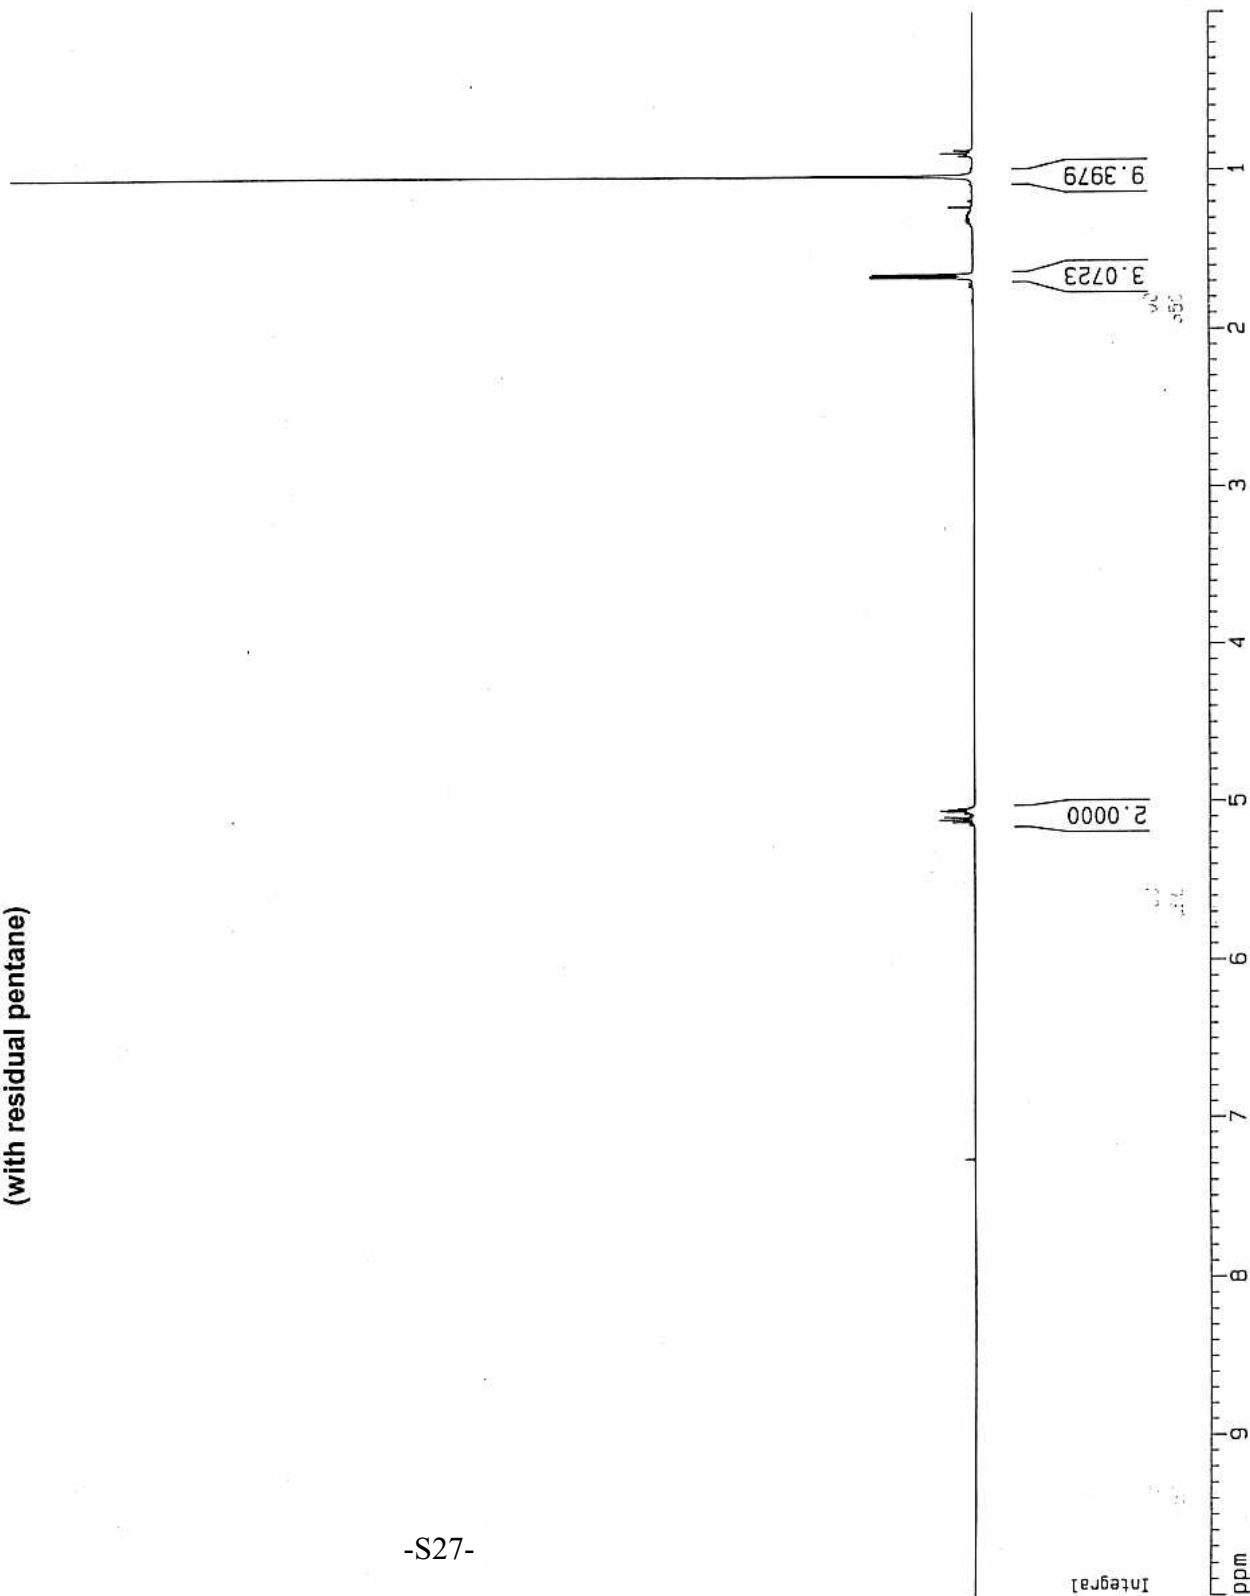

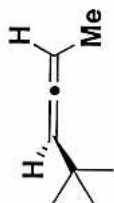

(S)-(+)-2c  
(with residual pentane)

Current Data Parameters  
NAME SN450-C  
EXPNO 2  
PROCNO 1

F2 - Acquisition Parameters  
Date\_ 20050222  
Time 22.14  
INSTRUM spect  
PROBHD 5 mm QNP 1H/1  
PULPROG zgpg30  
TD 65536  
SOLVENT CDCl3  
NS 178  
DS 4  
SMH 23980.814 Hz  
FIDRES 0.365918 Hz  
AQ 1.3654756 sec  
RG 3649.1  
DM 20.850 usec  
DE 6.00 usec  
TE 294.8 K  
D1 2.00000000 sec  
d11 0.03000000 sec  
DELTA 1.89999998 sec  
MCREST 0.00000000 sec  
MCHRK 0.01500000 sec

===== CHANNEL f1 =====  
NUC1 13C  
P1 8.50 usec  
PL1 3.00 dB  
SF01 100.6228298 MHz

===== CHANNEL f2 =====  
CPDPRG2 waltz16  
NUC2 1H  
PCPD2 88.01 usec  
PL2 3.00 dB  
PL12 22.00 dB  
PL13 22.00 dB  
SF02 400.1316005 MHz

F2 - Processing parameters  
SI 32768  
SF 100.6127461 MHz  
WDW EM  
SSB 0  
LB 1.00 Hz  
GB 0  
PC 1.40

10 NMR plot parameters  
CX 20.00 cm  
CY 12.50 cm  
F1p 210.000 ppm  
F1 21128.68 Hz  
F2p 0.000 ppm  
F2 0.00 Hz  
PPHMC 10.50000 ppm/cm  
HZCM 1056.43384 Hz/cm

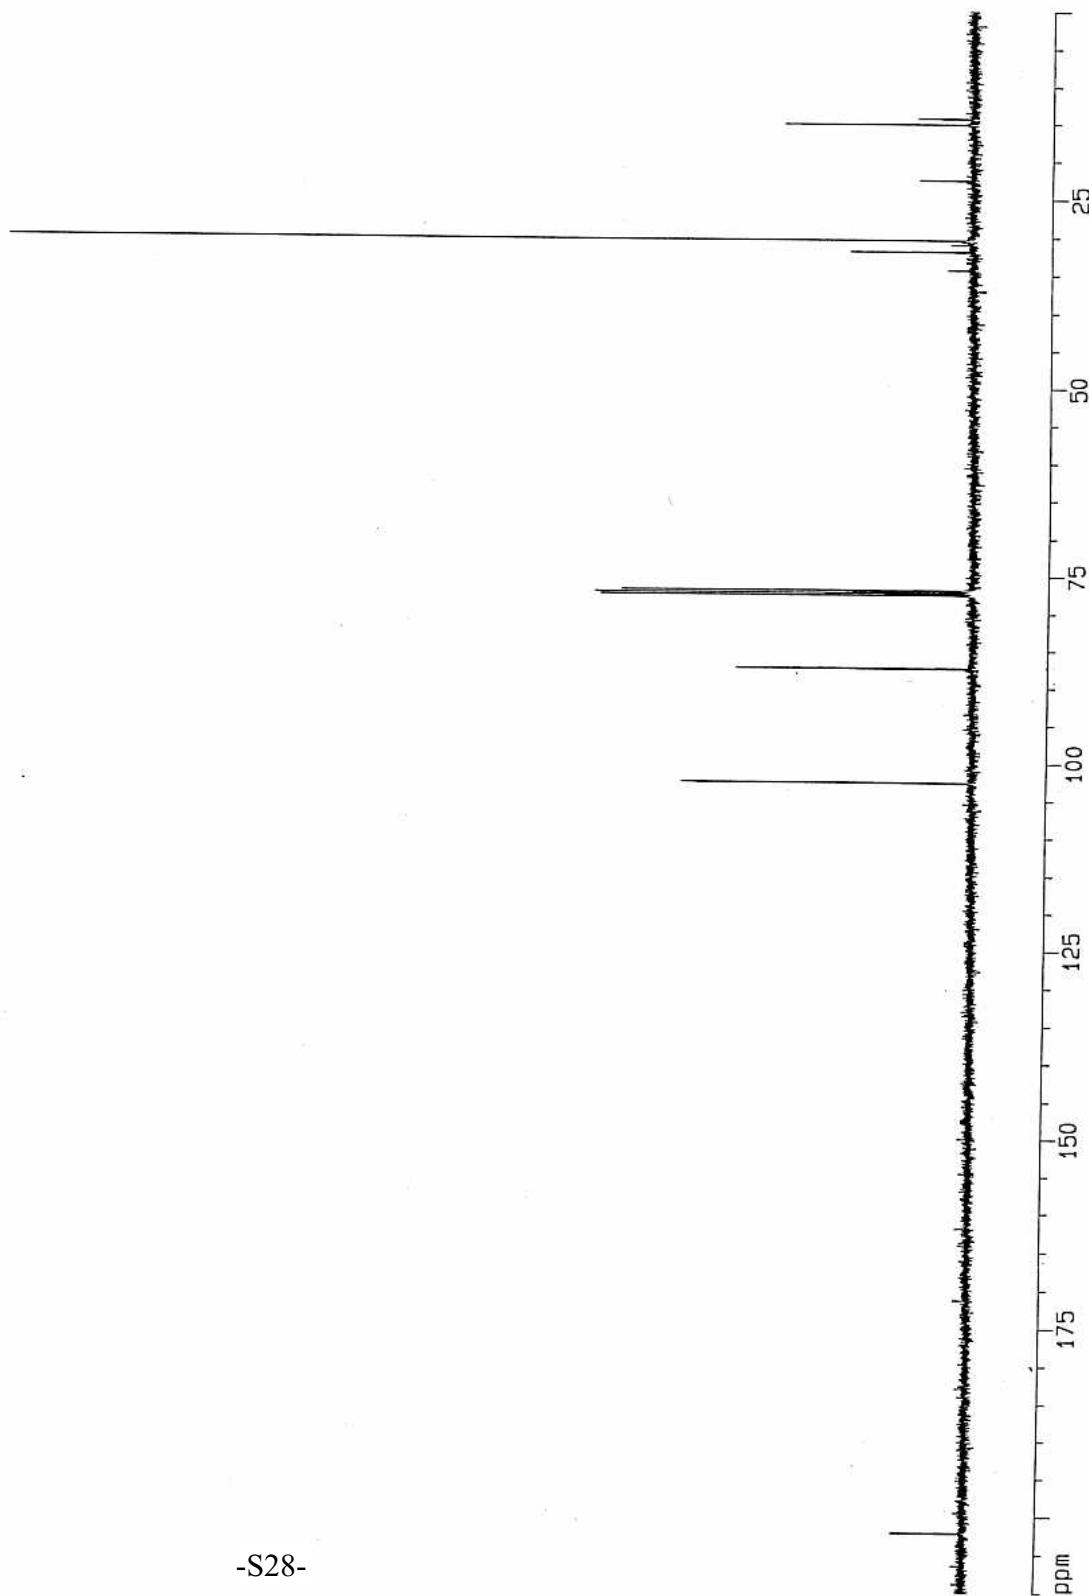

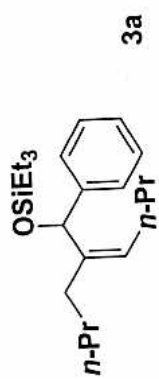

-S29-

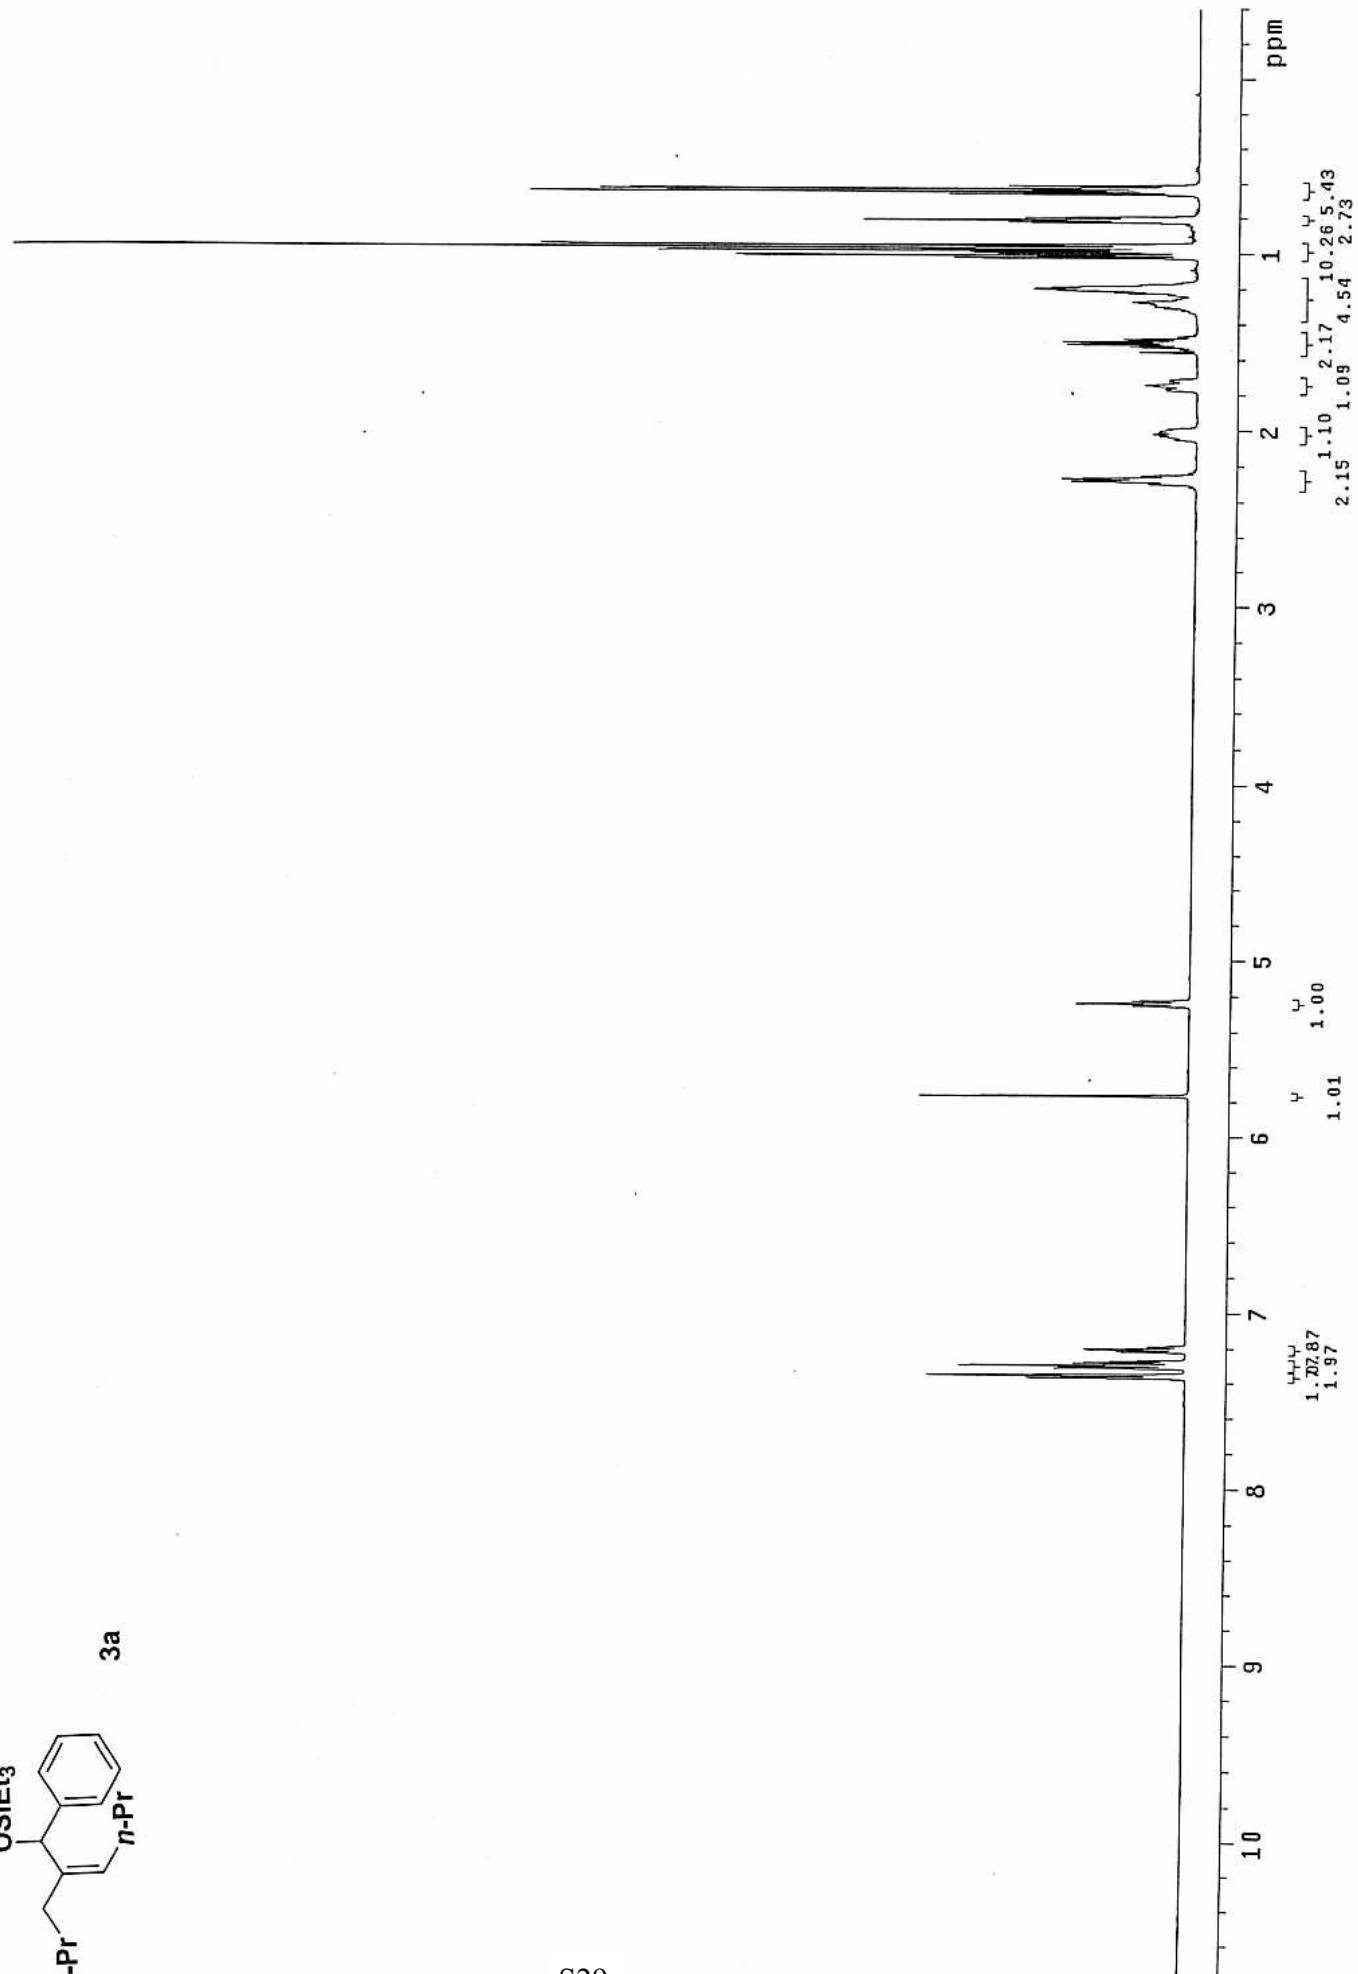

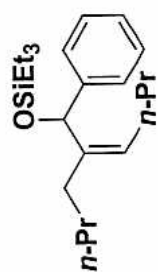

3a

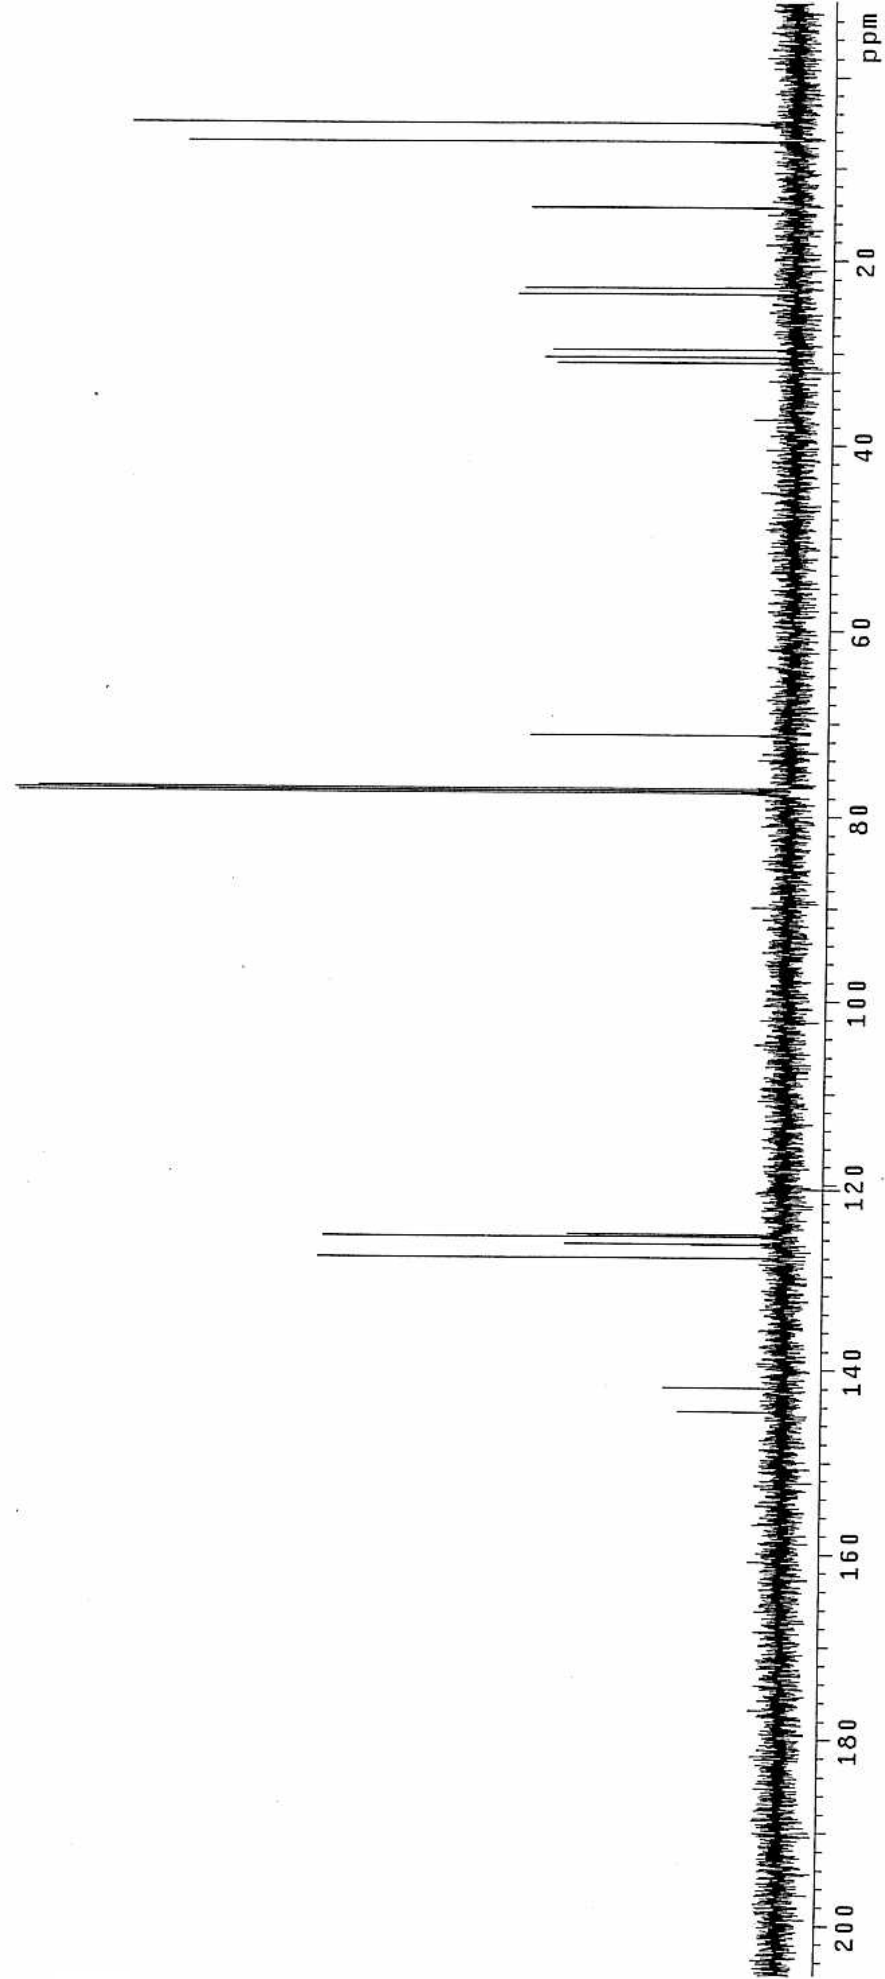

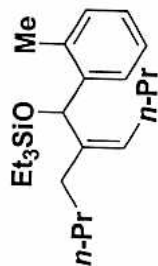

SN050454

3b

Current Data Parameters  
 NAME SN454-H  
 EXPNO 1  
 PROCNO 1

F2 - Acquisition Parameters  
 Date\_ 20050124  
 Time 16.24  
 INSTRUM spect  
 PROBHD 5mm BBO BB-1  
 PULPROG zg30  
 TO 65536  
 SOLVENT CDCl3  
 NS 16  
 DS 2  
 SWH 8278.145 Hz  
 FIDRES 0.126314 Hz  
 AQ 3.9584243 sec  
 RG 57  
 DW 60.400 usec  
 DE 6.00 usec  
 TE 300.0 K  
 D1 1.00000000 sec

===== CHANNEL f1 =====  
 NUC1 1H  
 P1 7.90 usec  
 PL1 0.00 dB  
 SF01 400.1324710 MHz

F2 - Processing parameters  
 SI 32768  
 SF 400.1300056 MHz  
 WDW EM  
 SSB 0  
 LB 0.30 Hz  
 GB 0  
 PC 1.00

1D NMR plot parameters  
 CX 20.00 cm  
 F1P 10.000 ppm  
 F1 4001.30 Hz  
 F2P -1.000 ppm  
 F2 -400.13 Hz  
 PPMCM 0.55000 ppm/cm  
 HZCM 220.07152 Hz/cm

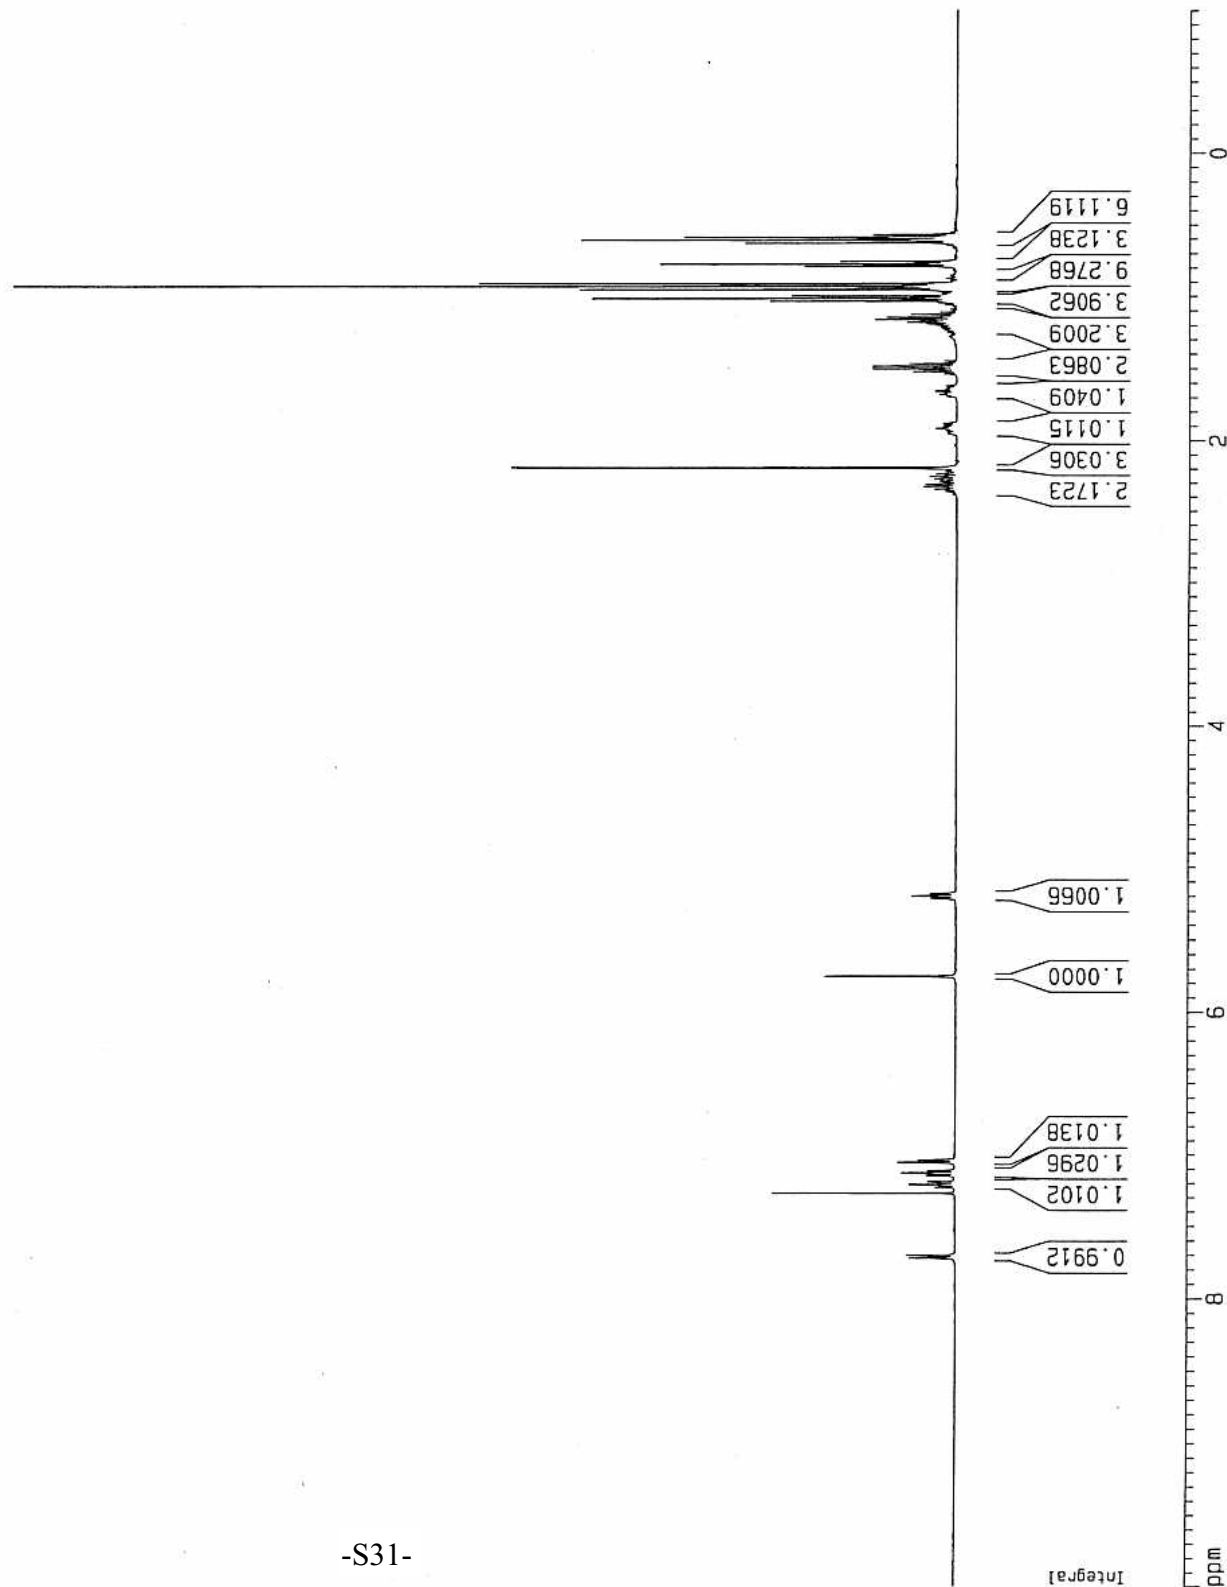

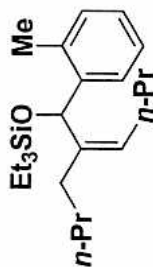

SN050454

3b

Current Data Parameters  
NAME SN454-C  
EXPNO 1  
PROCNO 1

F2 - Acquisition Parameters  
Date\_ 20050124  
Time 16.43  
INSTRUM spect  
PROBHD 5mm BBO BB-1  
PULPROG zgpg30  
TD 65536  
SOLVENT COC13  
NS 136  
DS 4  
SWH 25125.629 Hz  
FIDRES 0.383367 Hz  
AQ 1.3042164 sec  
RG 8192  
DM 19.900 usec  
DE 6.00 usec  
TE 300.0 K  
D1 2.00000000 sec  
d11 0.03000000 sec  
d12 0.00002000 sec

===== CHANNEL f1 =====  
NUC1 13C  
P1 15.25 usec  
PL1 3.00 dB  
SF01 100.6237959 MHz

===== CHANNEL f2 =====  
CPDPRG2 waltz16  
NUC2 1H  
PCPD2 107.50 usec  
PL2 0.00 dB  
PL12 24.00 dB  
PL13 24.00 dB  
SF02 400.1316005 MHz

F2 - Processing parameters  
SI 32768  
SF 100.6127484 MHz  
WDW EM  
SSB 0  
LB 1.00 Hz  
GB 0  
PC 1.40

1D NMR plot parameters  
CX 20.00 cm  
F1P 220.000 ppm  
F1 22134.80 Hz  
F2 0.000 ppm  
F2 0.00 Hz  
PPMCM 11.00000 ppm/cm  
HZCM 1106.74023 Hz/cm

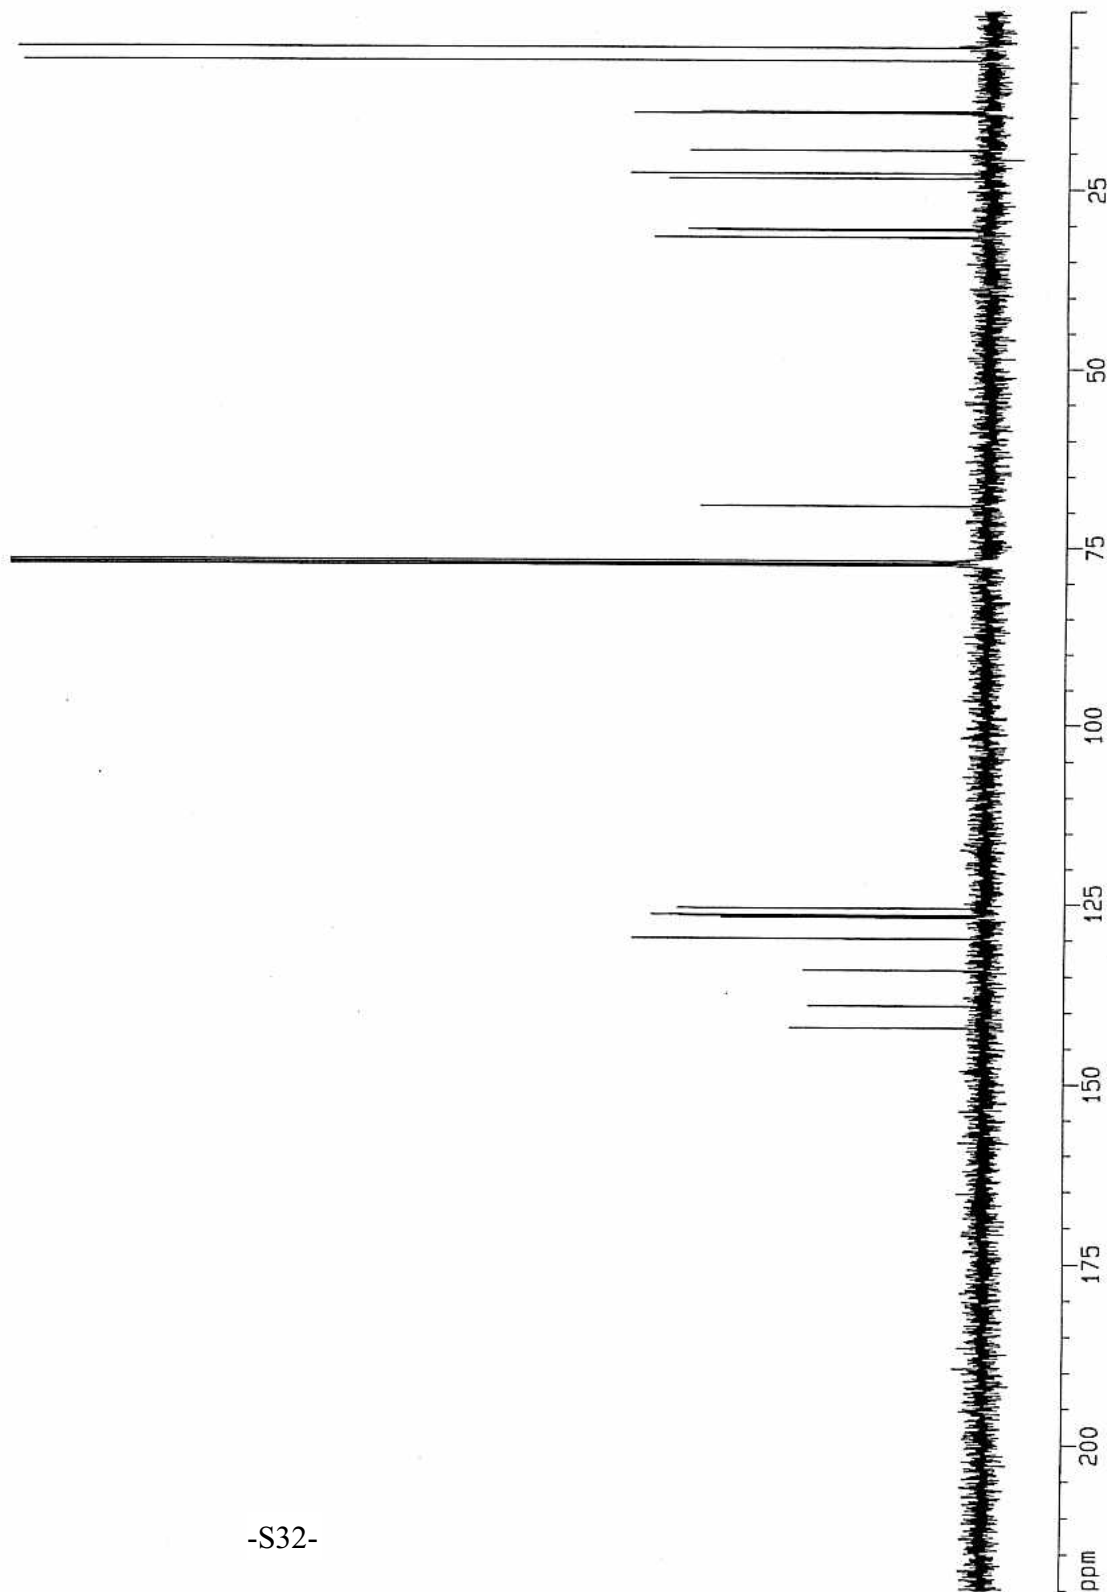



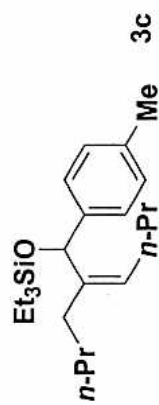

-S33-

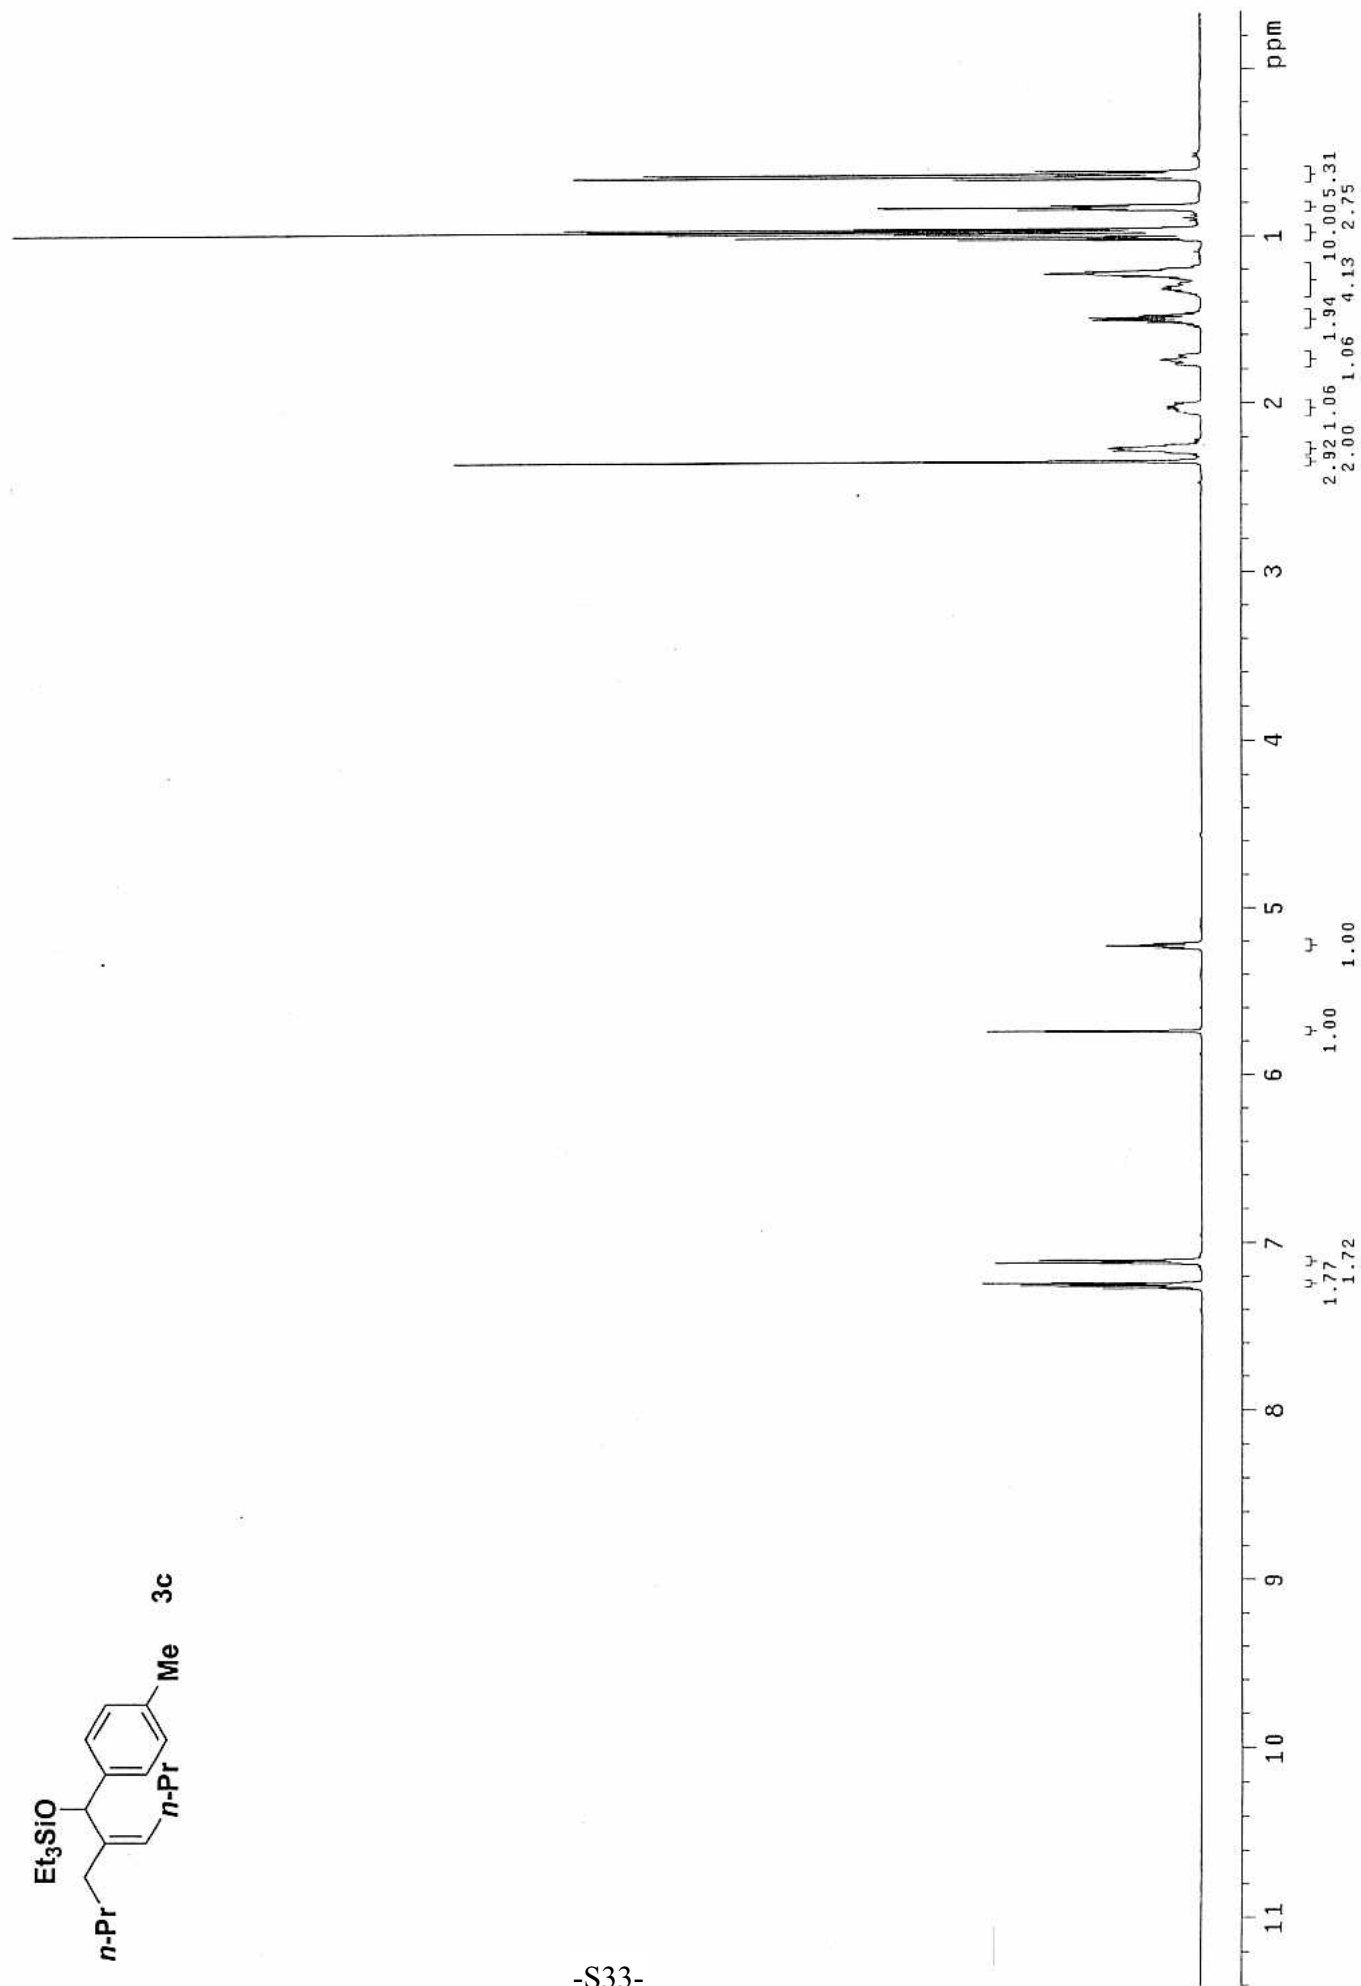

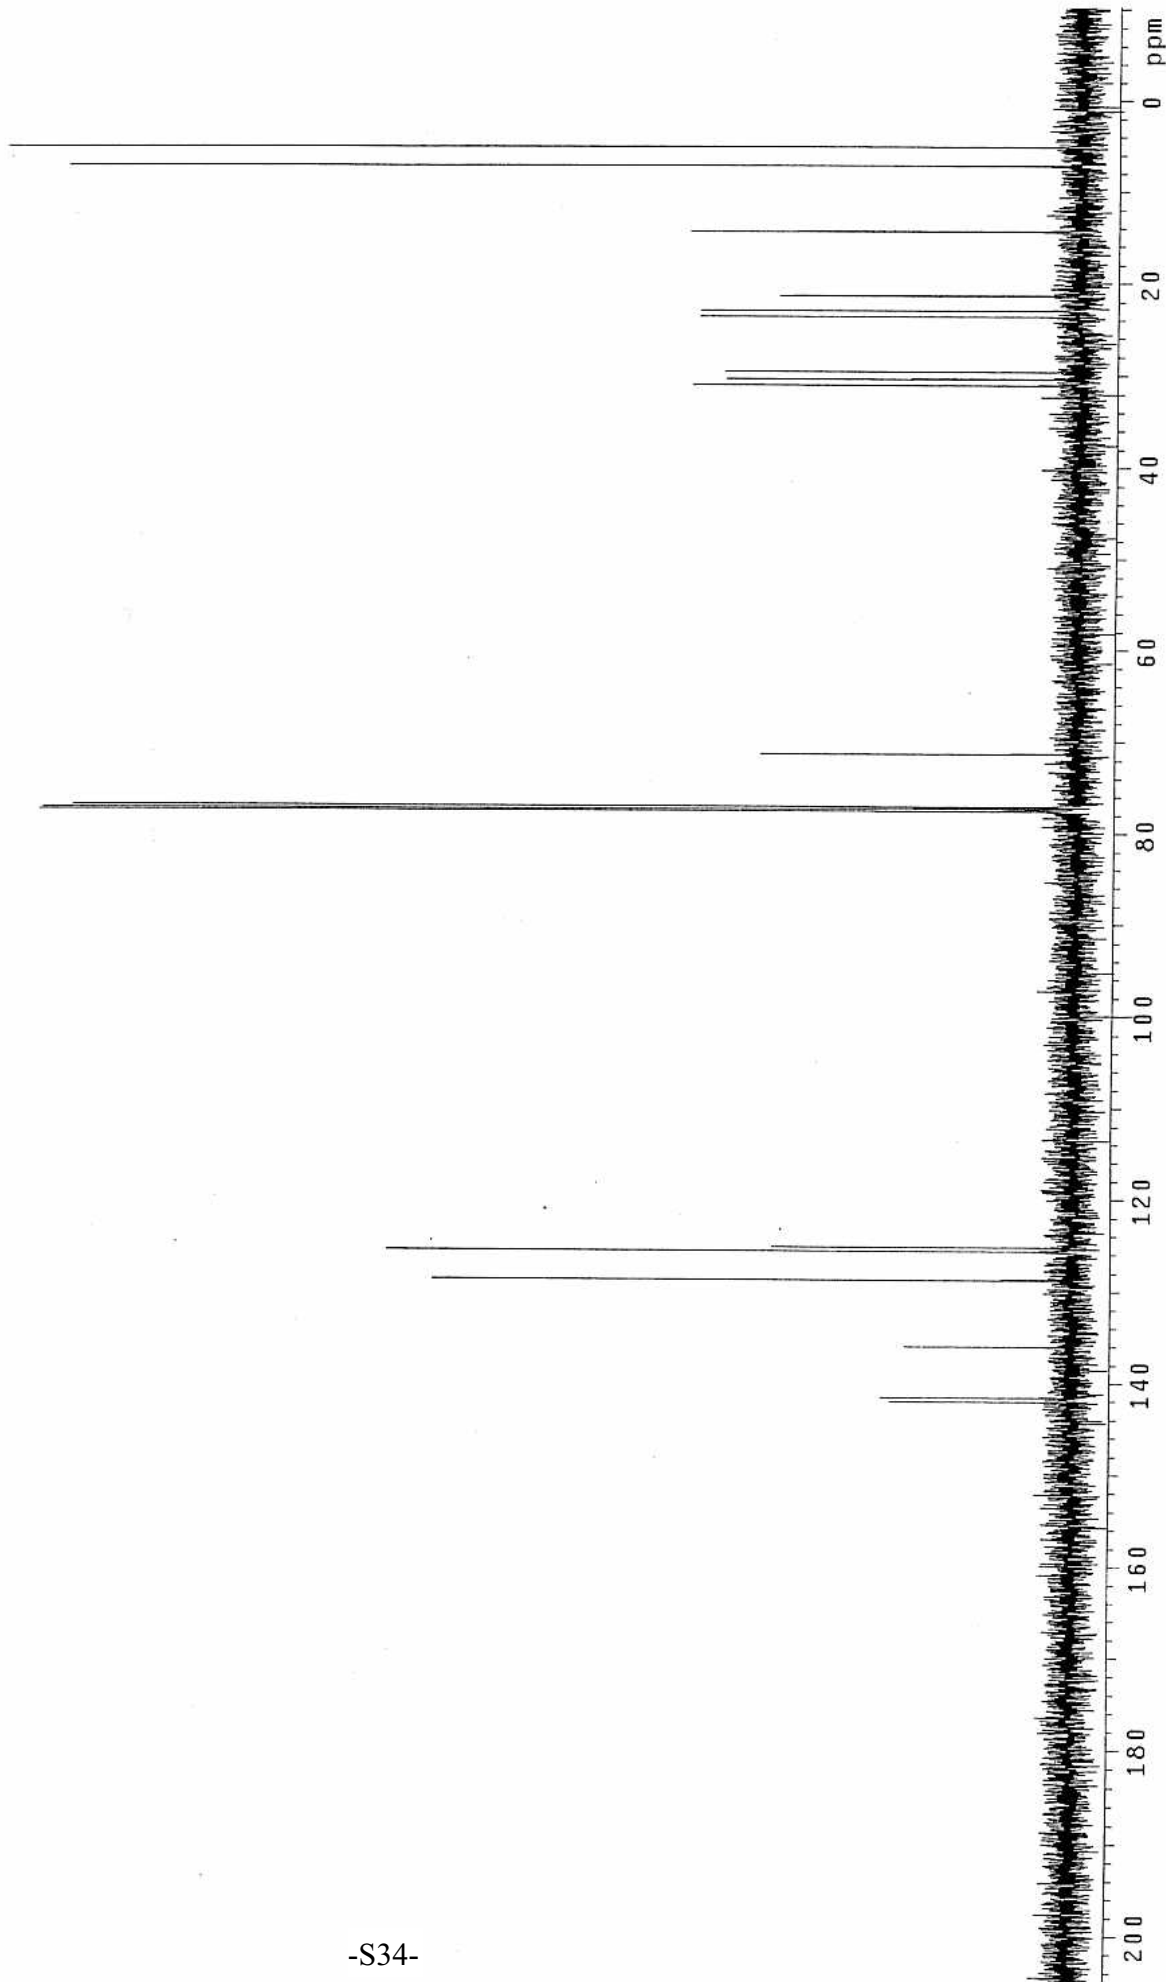

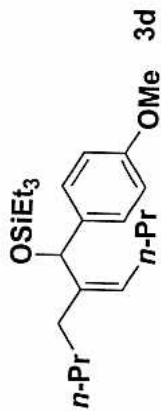

Current Data Parameters  
 NAME SN450-H  
 EXPNO 2  
 PROCNO 1

F2 - Acquisition Parameters  
 Date\_ 20050120  
 Time 21.21  
 INSTRUM Spect  
 PROBD 5 mm QNP 1H/1  
 PULPROG zg30  
 TO 65536  
 SOLVENT CDCl3  
 NS 16  
 DS 2  
 SWH 8278.146 Hz  
 FIDRES 0.126314 Hz  
 AQ 3.9584243 sec  
 RG 203.2  
 DW 60.400 usec  
 DE 6.00 usec  
 TE 293.7 K  
 D1 1.00000000 sec  
 MCREST 0.00000000 sec  
 MCWAK 0.01500000 sec

===== CHANNEL f1 =====  
 NUC1 1H  
 P1 9.88 usec  
 PL1 3.00 dB  
 SF01 400.1324710 MHz

F2 - Processing parameters  
 SI 32768  
 SF 400.1300054 MHz  
 WDW EM  
 SSB 0  
 LB 0.30 Hz  
 GB 0  
 PC 1.00

1D NMR plot parameters  
 CX 20.00 cm  
 CY 12.50 cm  
 F1P 10.000 ppm  
 F1 4001.30 Hz  
 F2P 0.000 ppm  
 F2 0.00 Hz  
 PPMCM 0.50000 ppm/cm  
 HZCM 200.06500 Hz/cm

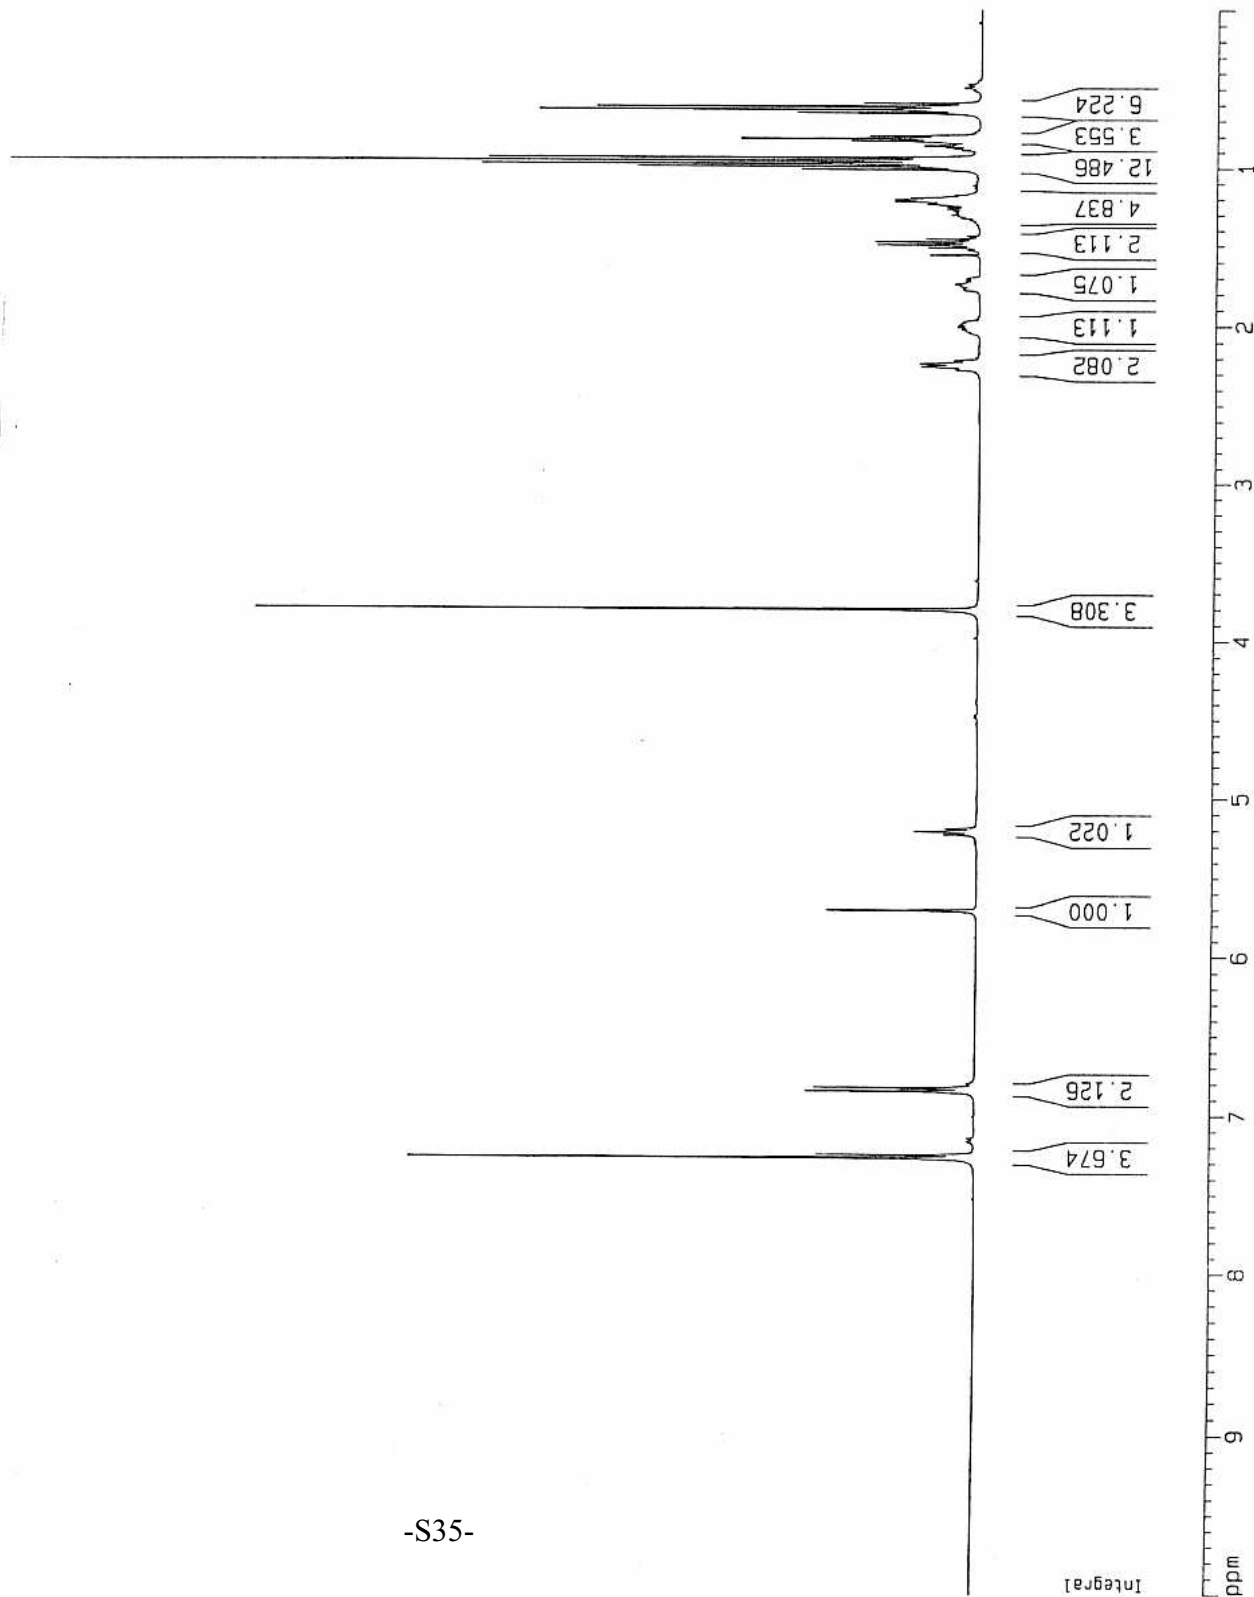

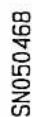

| D NMR plot parameters |                  |
|-----------------------|------------------|
| X                     | 20.00 cm         |
| 1P                    | 200.000 ppm      |
| 1                     | 20122.55 Hz      |
| 2P                    | 0.000 ppm        |
| 2                     | 0.00 Hz          |
| PMCM                  | 10.00000 ppm/cm  |
| ZCM                   | 1006.12744 Hz/cm |

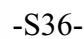

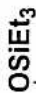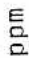

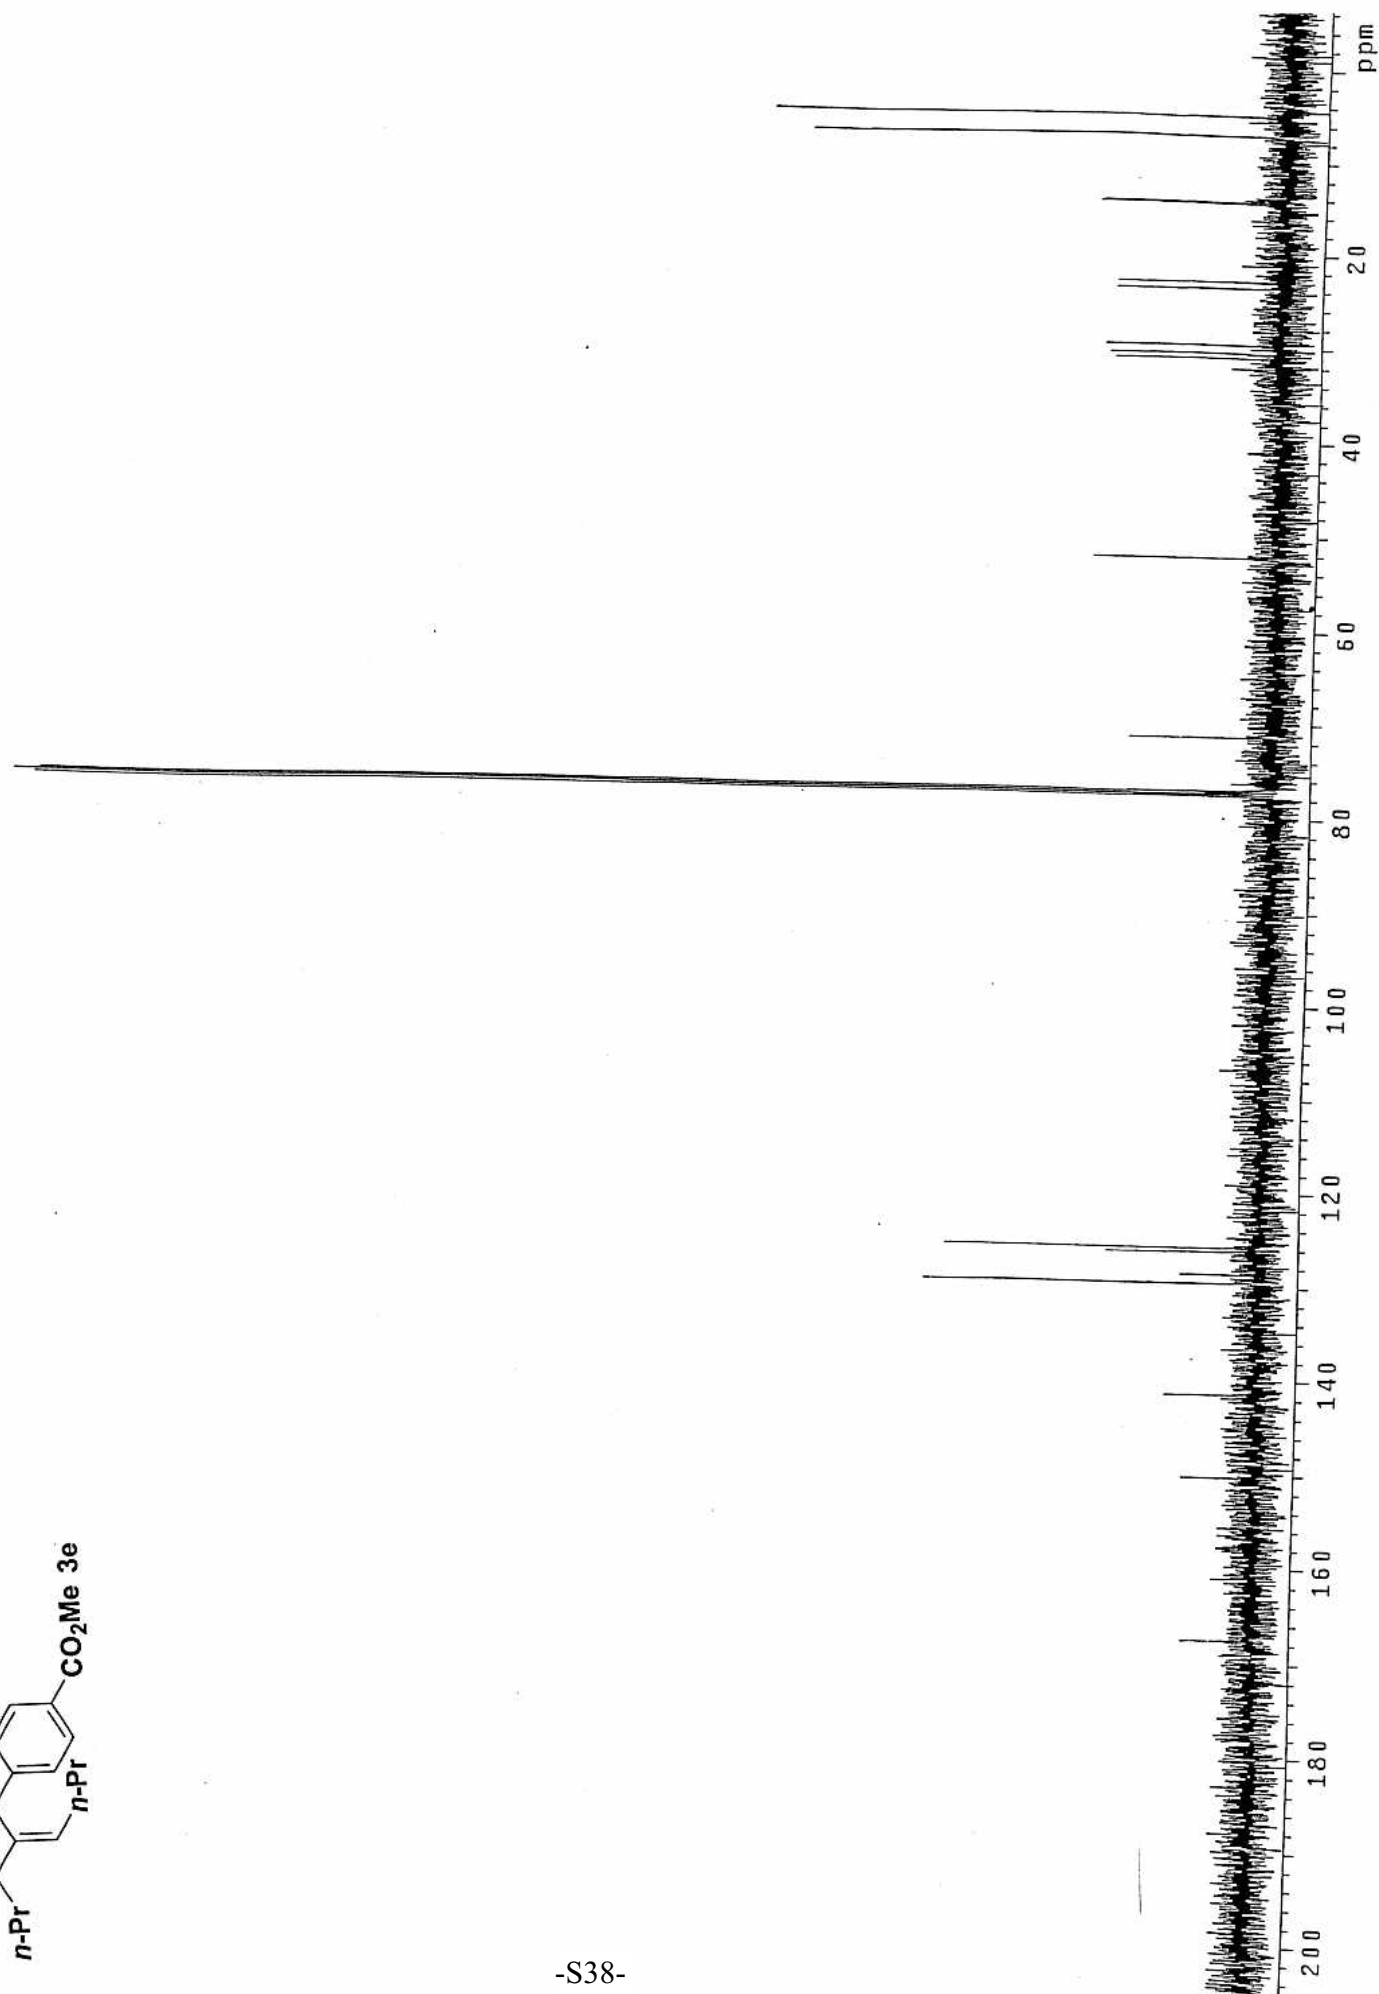

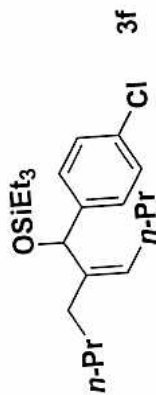

Current Data Parameters  
 NAME SN455-H  
 EXPNO 1  
 PROCNO 1

F2 - Acquisition Parameters  
 Date\_ 20050124  
 Time 16.51  
 INSTRUM spect  
 PROBHD 5mm BB-1  
 PULPROG zg30  
 TD 65536  
 SOLVENT CDCl3  
 NS 16  
 DS 2  
 SWH 8278.146 Hz  
 FIDRES 0.126314 Hz  
 AQ 3.9584243 sec  
 RG 57  
 DW 60.400 usec  
 DE 6.00 usec  
 TE 300.0 K  
 D1 1.0000000 sec

===== CHANNEL f1 =====  
 NUC1 1H  
 P1 7.90 usec  
 PL1 0.00 dB  
 SF01 400.1324710 MHz

F2 - Processing parameters  
 SI 32768  
 SF 400.1300000 MHz  
 WDW EM  
 SSB 0  
 LB 0.30 Hz  
 GB 0  
 PC 1.00

1D NMR plot parameters  
 CX 20.00 cm  
 F1P 10.000 ppm  
 F1 4001.30 Hz  
 F2P 0.000 ppm  
 F2 0.00 Hz  
 PPMCM 0.50000 ppm/cm  
 HZCM 200.06500 Hz/cm

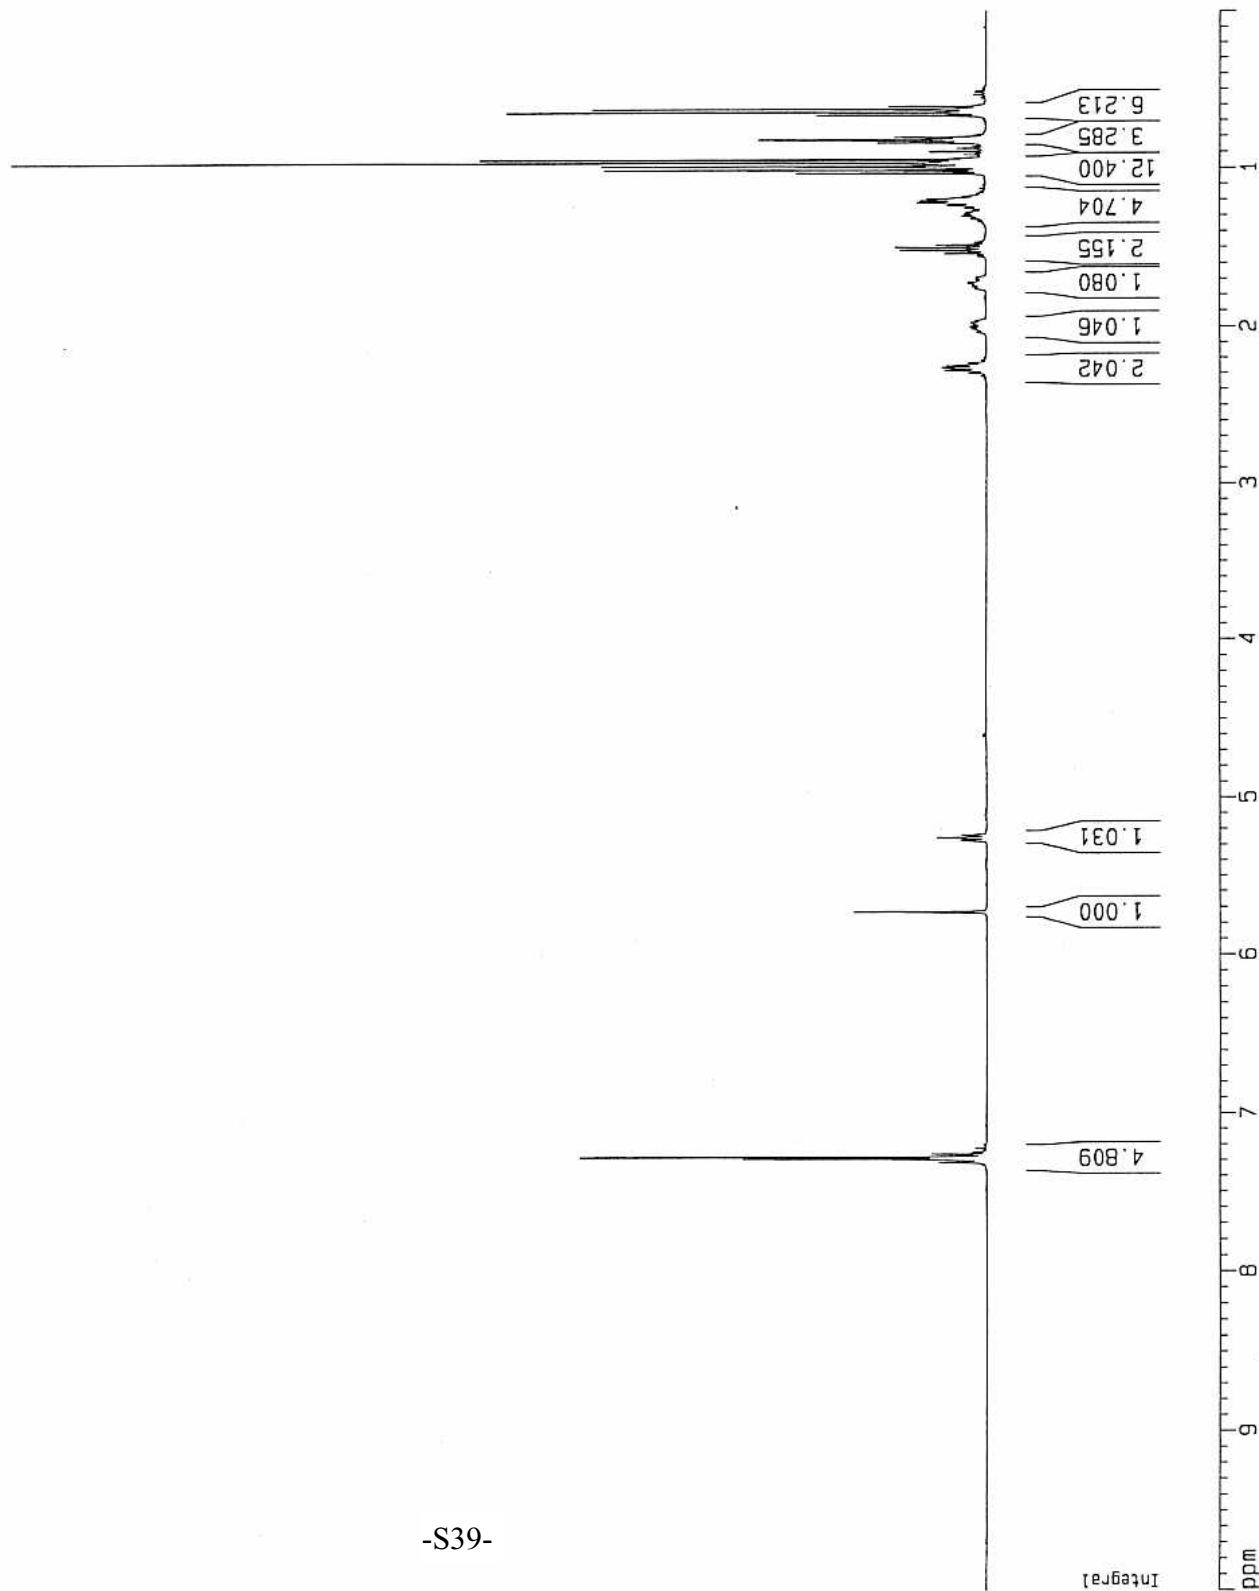

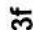

| F2 - Acquisition Parameters |                |
|-----------------------------|----------------|
| Date_                       | 20050124       |
| Time                        | 17.06          |
| INSTRUM                     | spect          |
| PROBHD                      | 5mm BBO BB-1   |
| PULPROG                     | zgpg30         |
| TD                          | 65536          |
| SOLVENT                     | CDCl3          |
| NS                          | 152            |
| DS                          | 4              |
| SWH                         | 25125.629 Hz   |
| FIDRES                      | 0.383387 Hz    |
| AQ                          | 1.3042164 sec  |
| RG                          | 3549.1         |
| DW                          | 19.900 usec    |
| DE                          | 6.00 usec      |
| TE                          | 300.0 K        |
| D1                          | 2.00000000 sec |
| d11                         | 0.03000000 sec |
| d12                         | 0.00002000 sec |

```
===== CHANNEL F2 =====
CFDPAG2
NUC2      3H
PCPD2     107.50 usec
PL2       0.00 dB
PL12      24.00 dB
PL13      24.00 dB
SF02      400.1316005 MHz
```

|                            |                 |
|----------------------------|-----------------|
| F2 - Processing parameters |                 |
| SI                         | 32768           |
| SF                         | 100.6127475 MHz |
| WDW                        | EM              |
| SSB                        | 0               |
| LB                         | 1.00 Hz         |
| GB                         | 0               |
| PC                         | 1.40            |

|                        |                  |
|------------------------|------------------|
| 10 NMR plot parameters |                  |
| CX                     | 20.00 cm         |
| F1P                    | 210.000 ppm      |
| F1                     | 21128.68 Hz      |
| F2P                    | 0.000 ppm        |
| F2                     | 0.00 Hz          |
| PPMCM                  | 10.50000 ppm/cm  |
| HZCM                   | 1056.43394 Hz/cm |

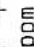



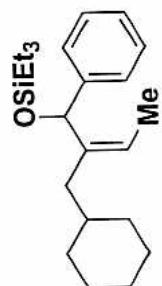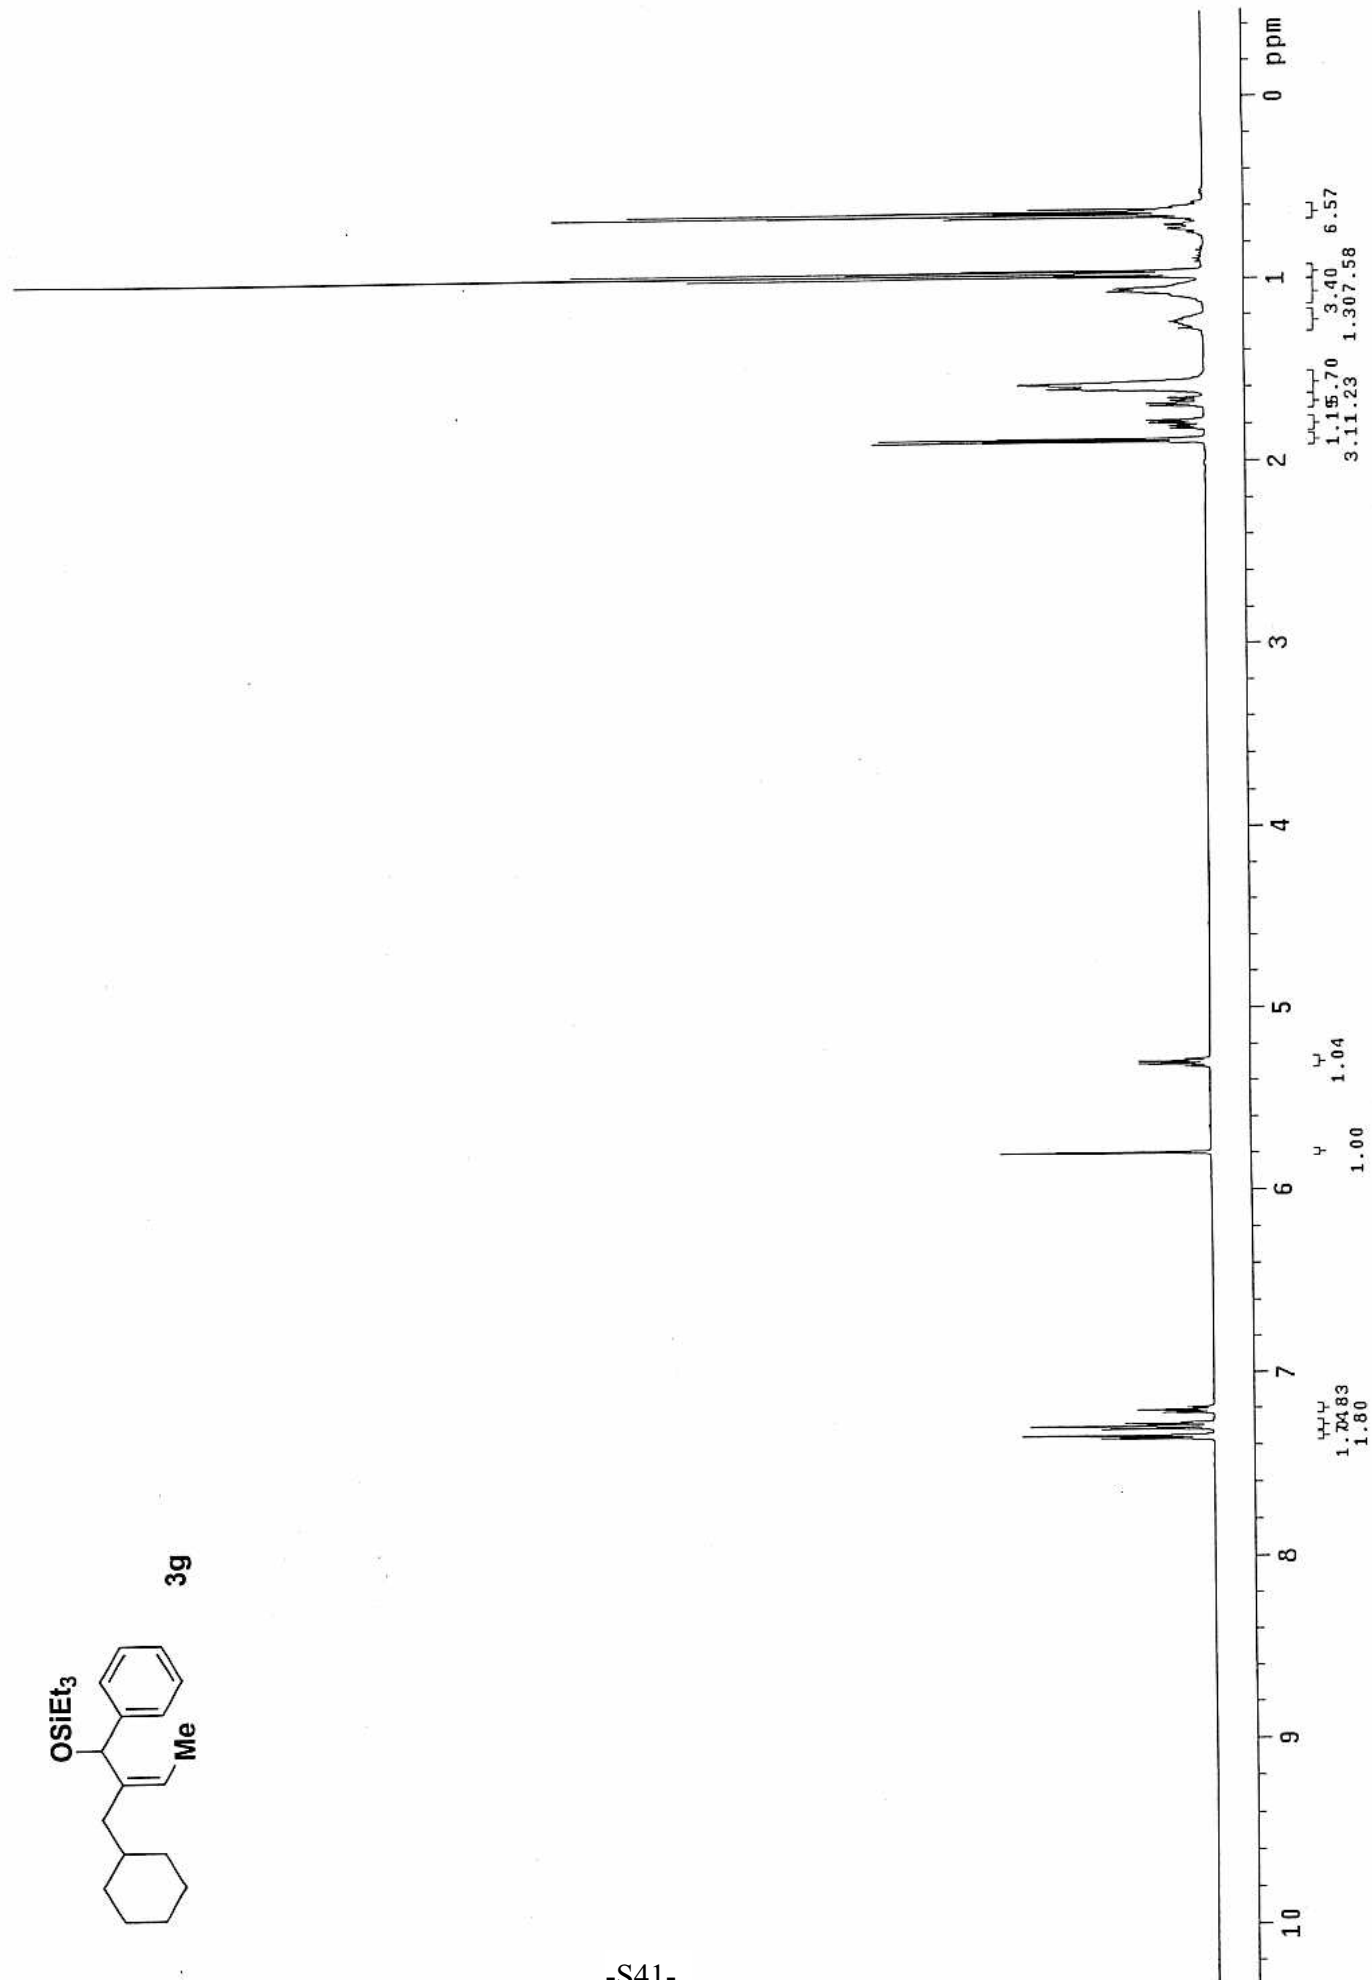

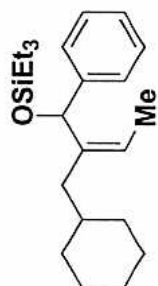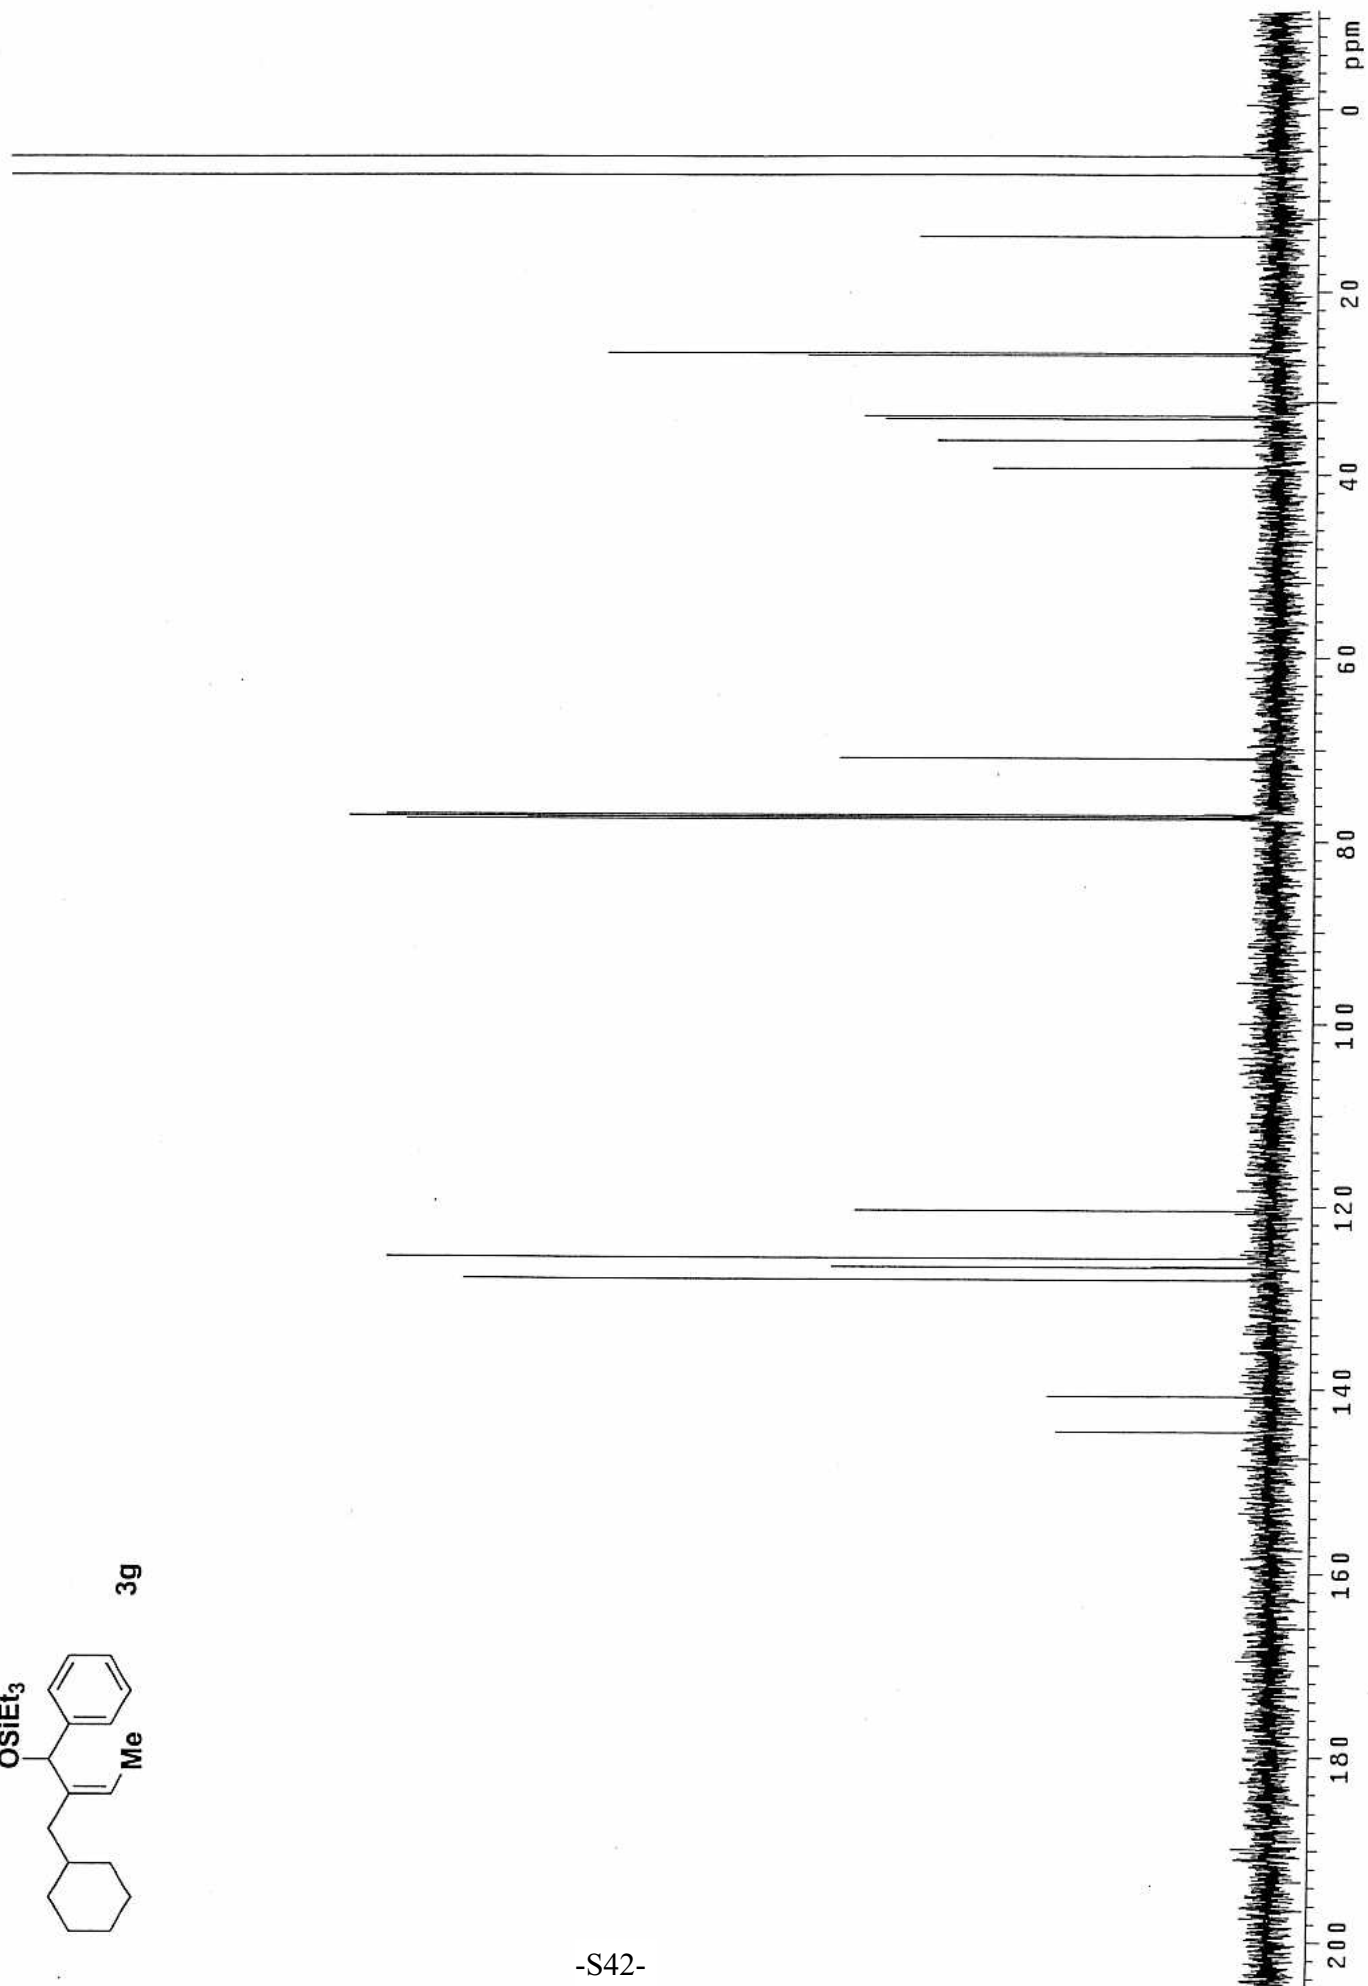

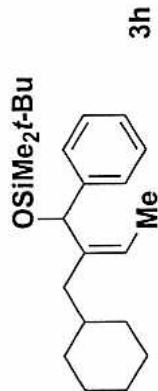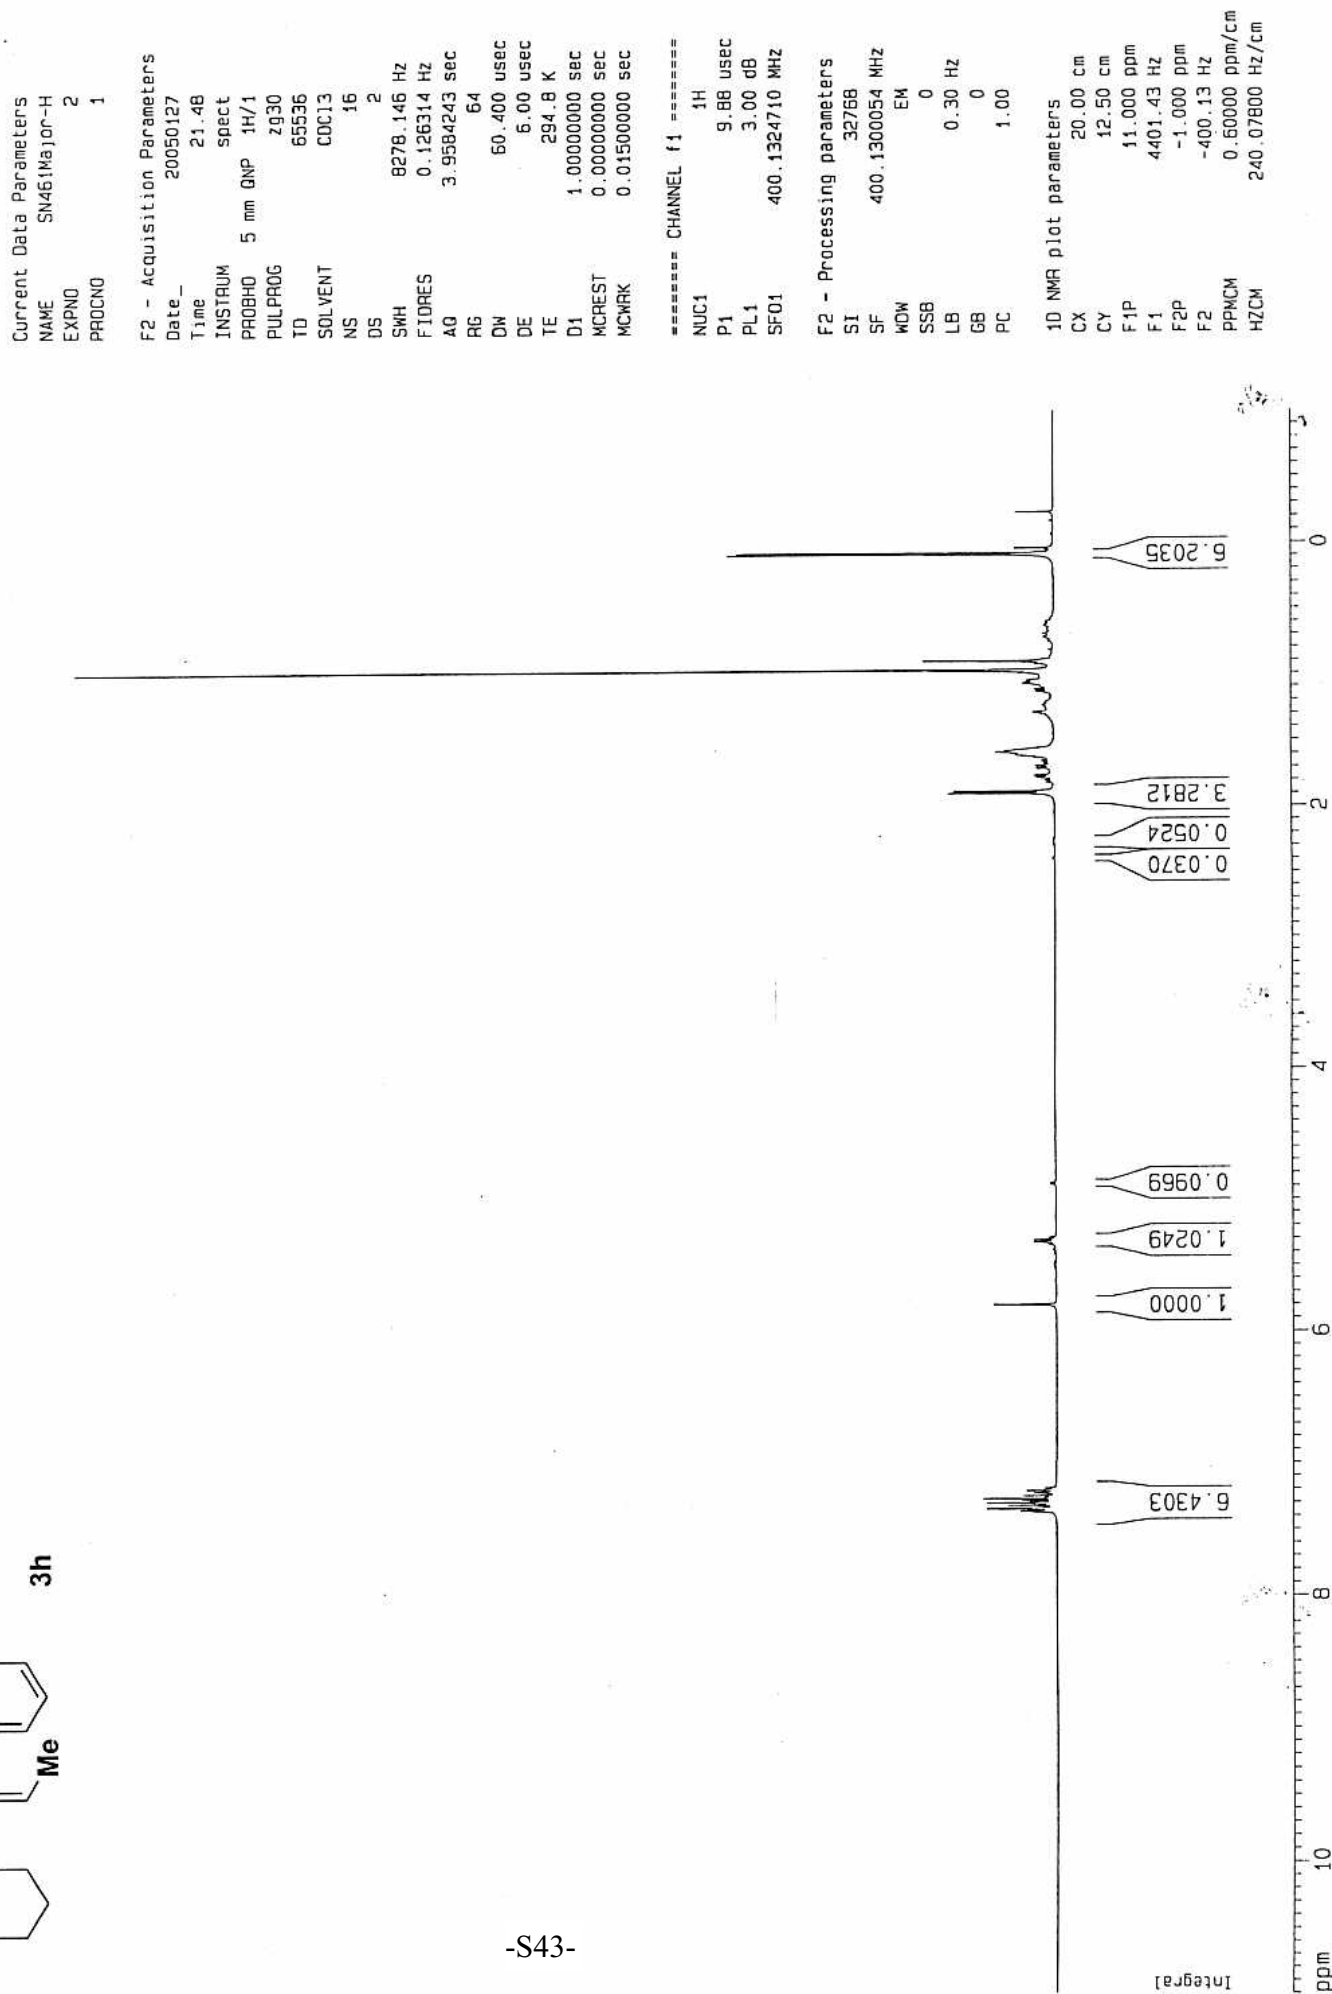

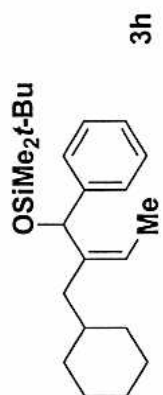

-S44-

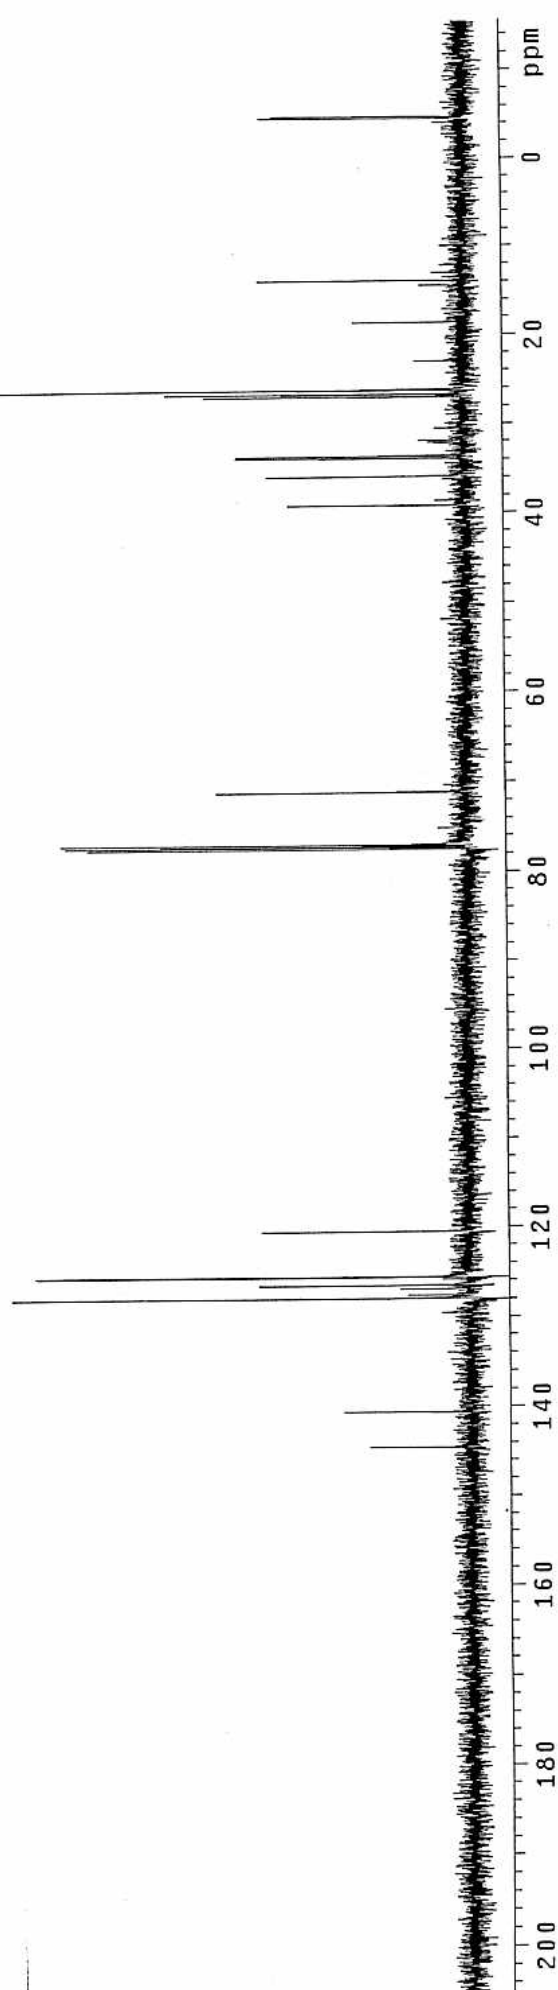

**OSiMe<sub>2</sub>Ph**

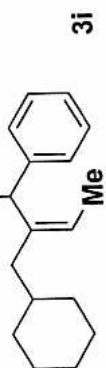

3i

 $C_6D_6$ 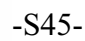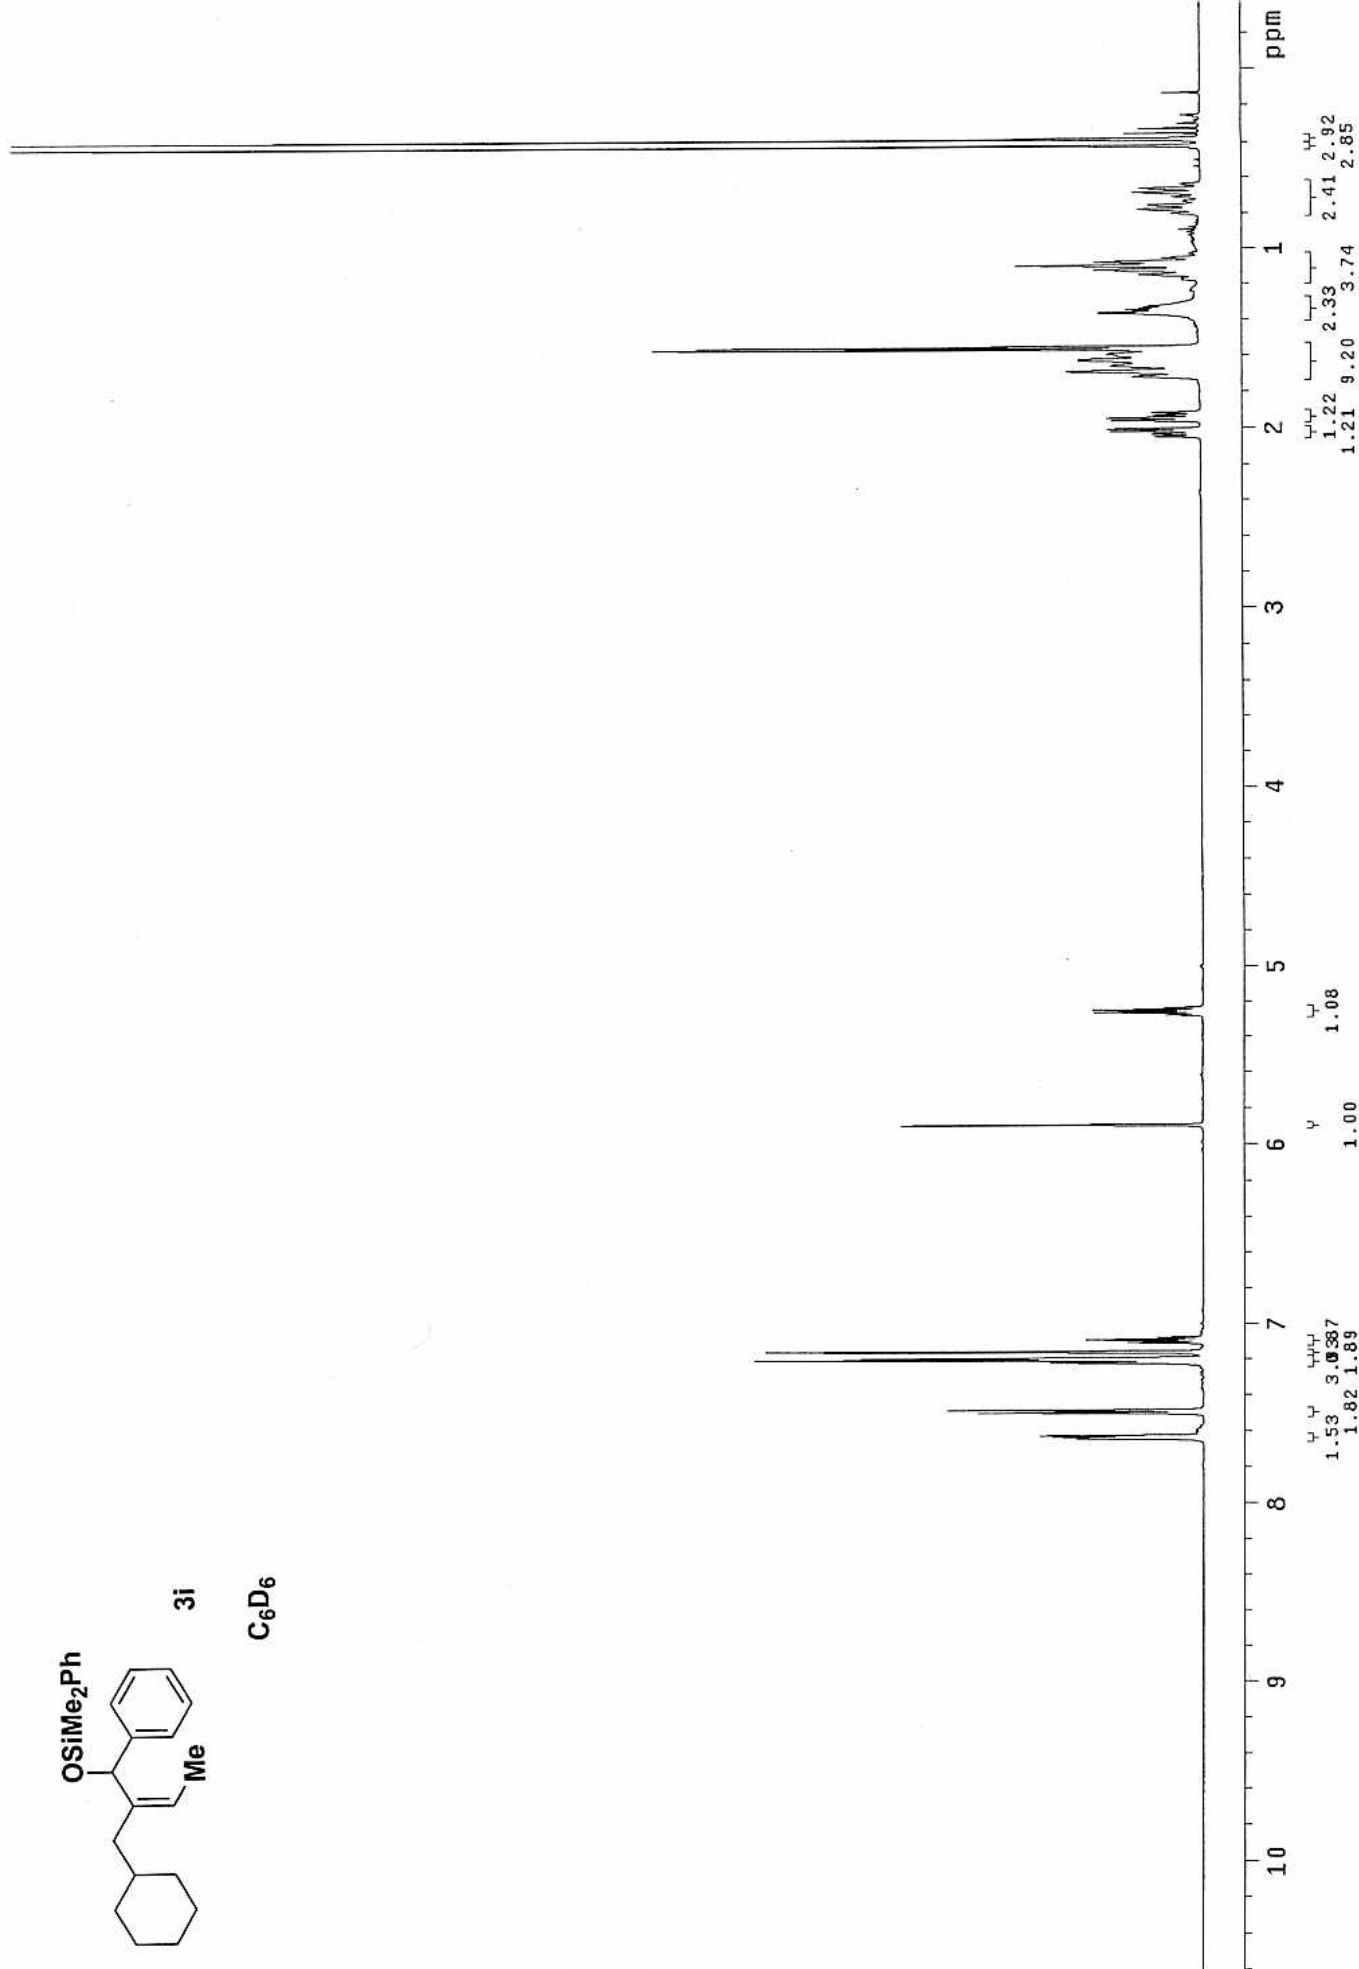

SN050529

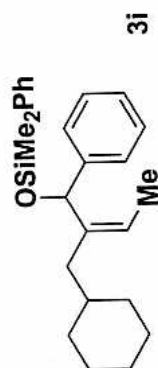

CDCl<sub>3</sub>

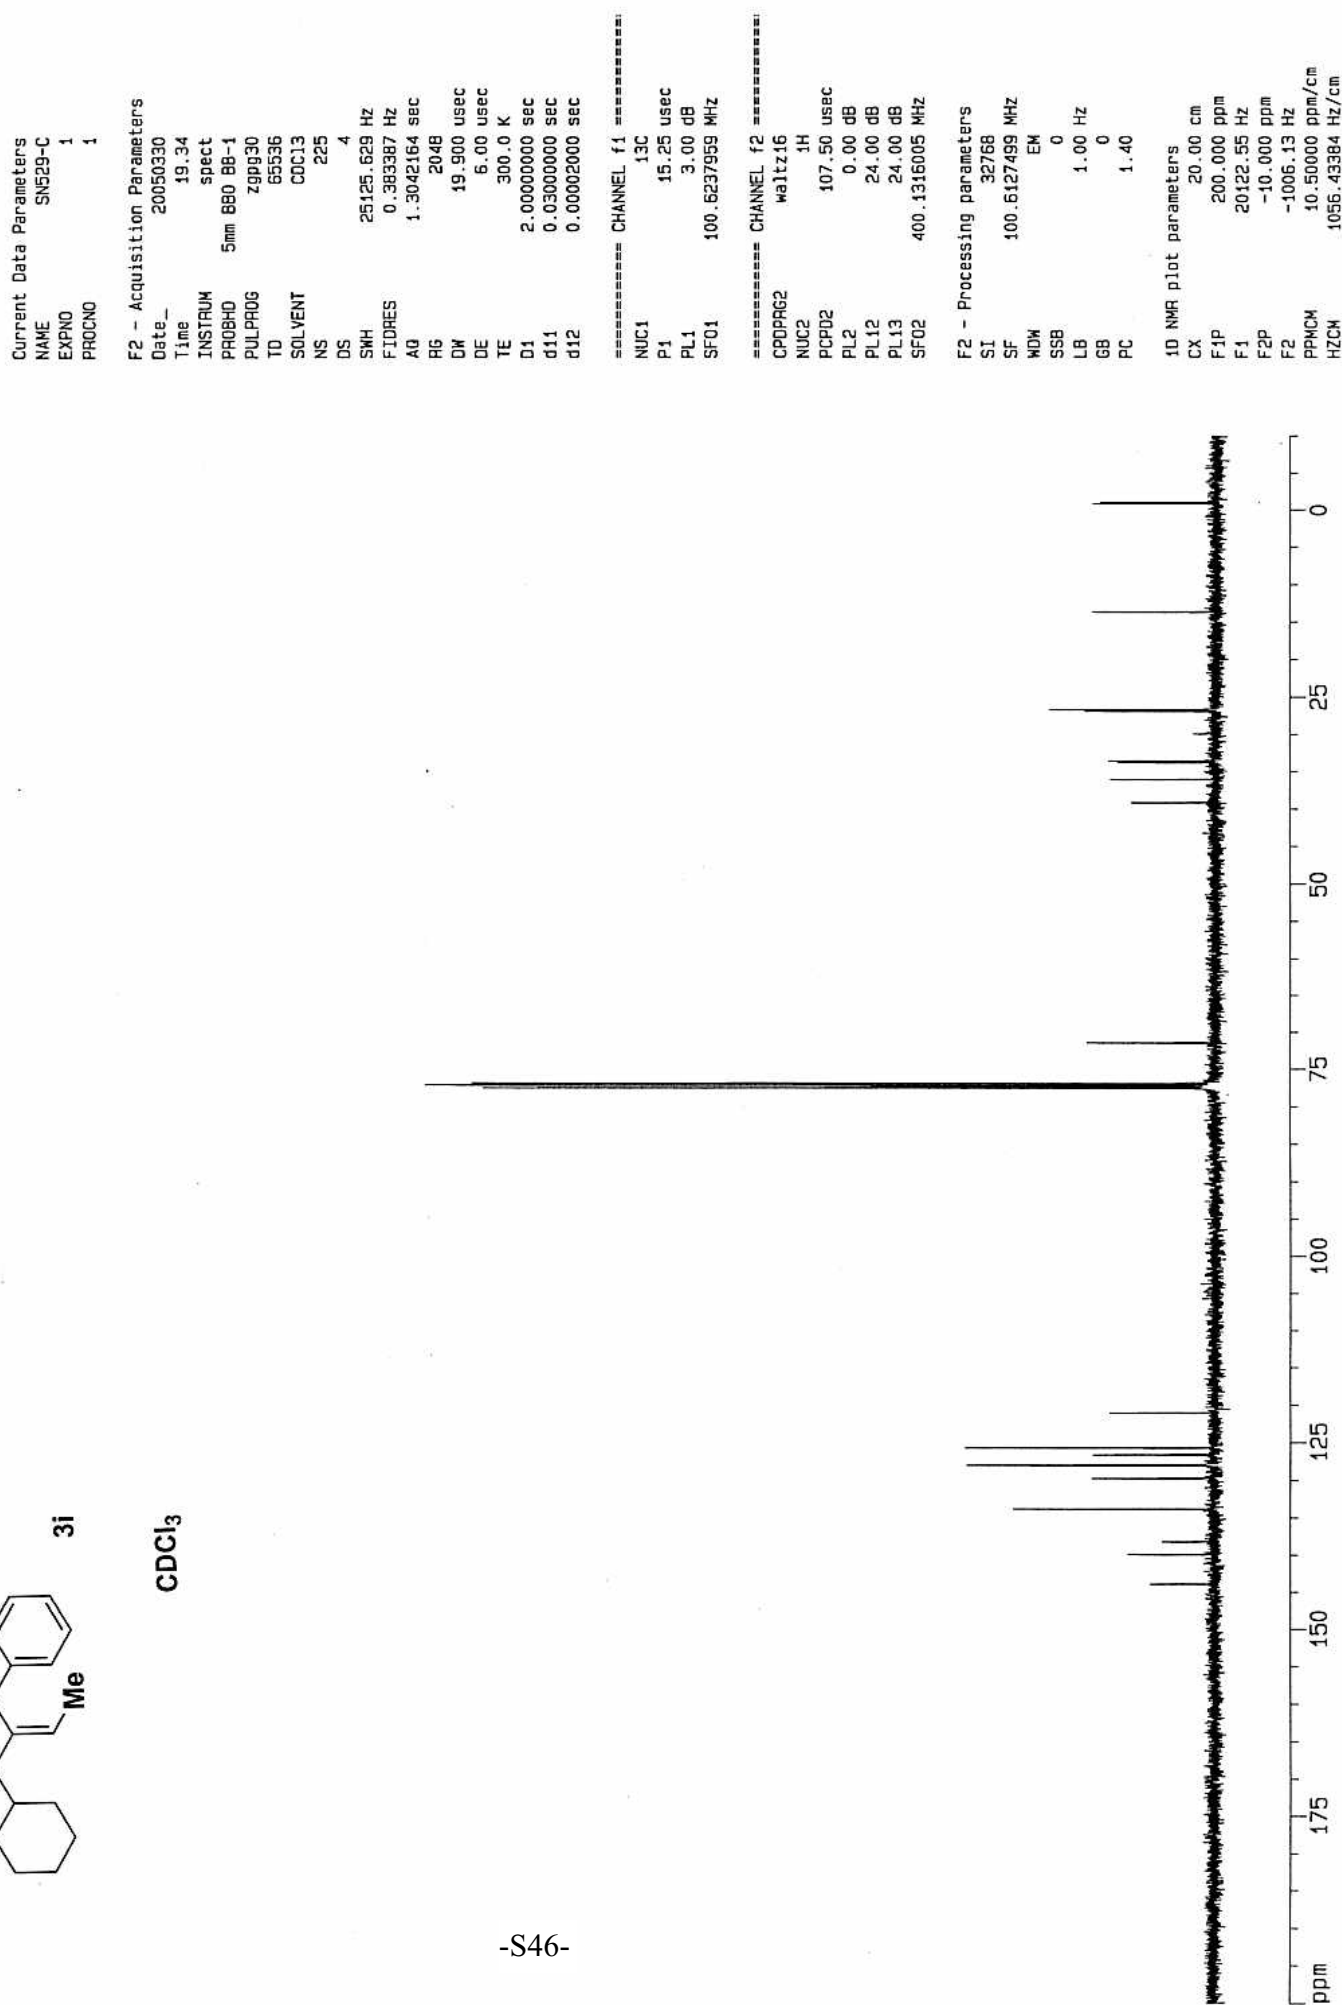

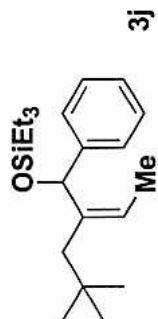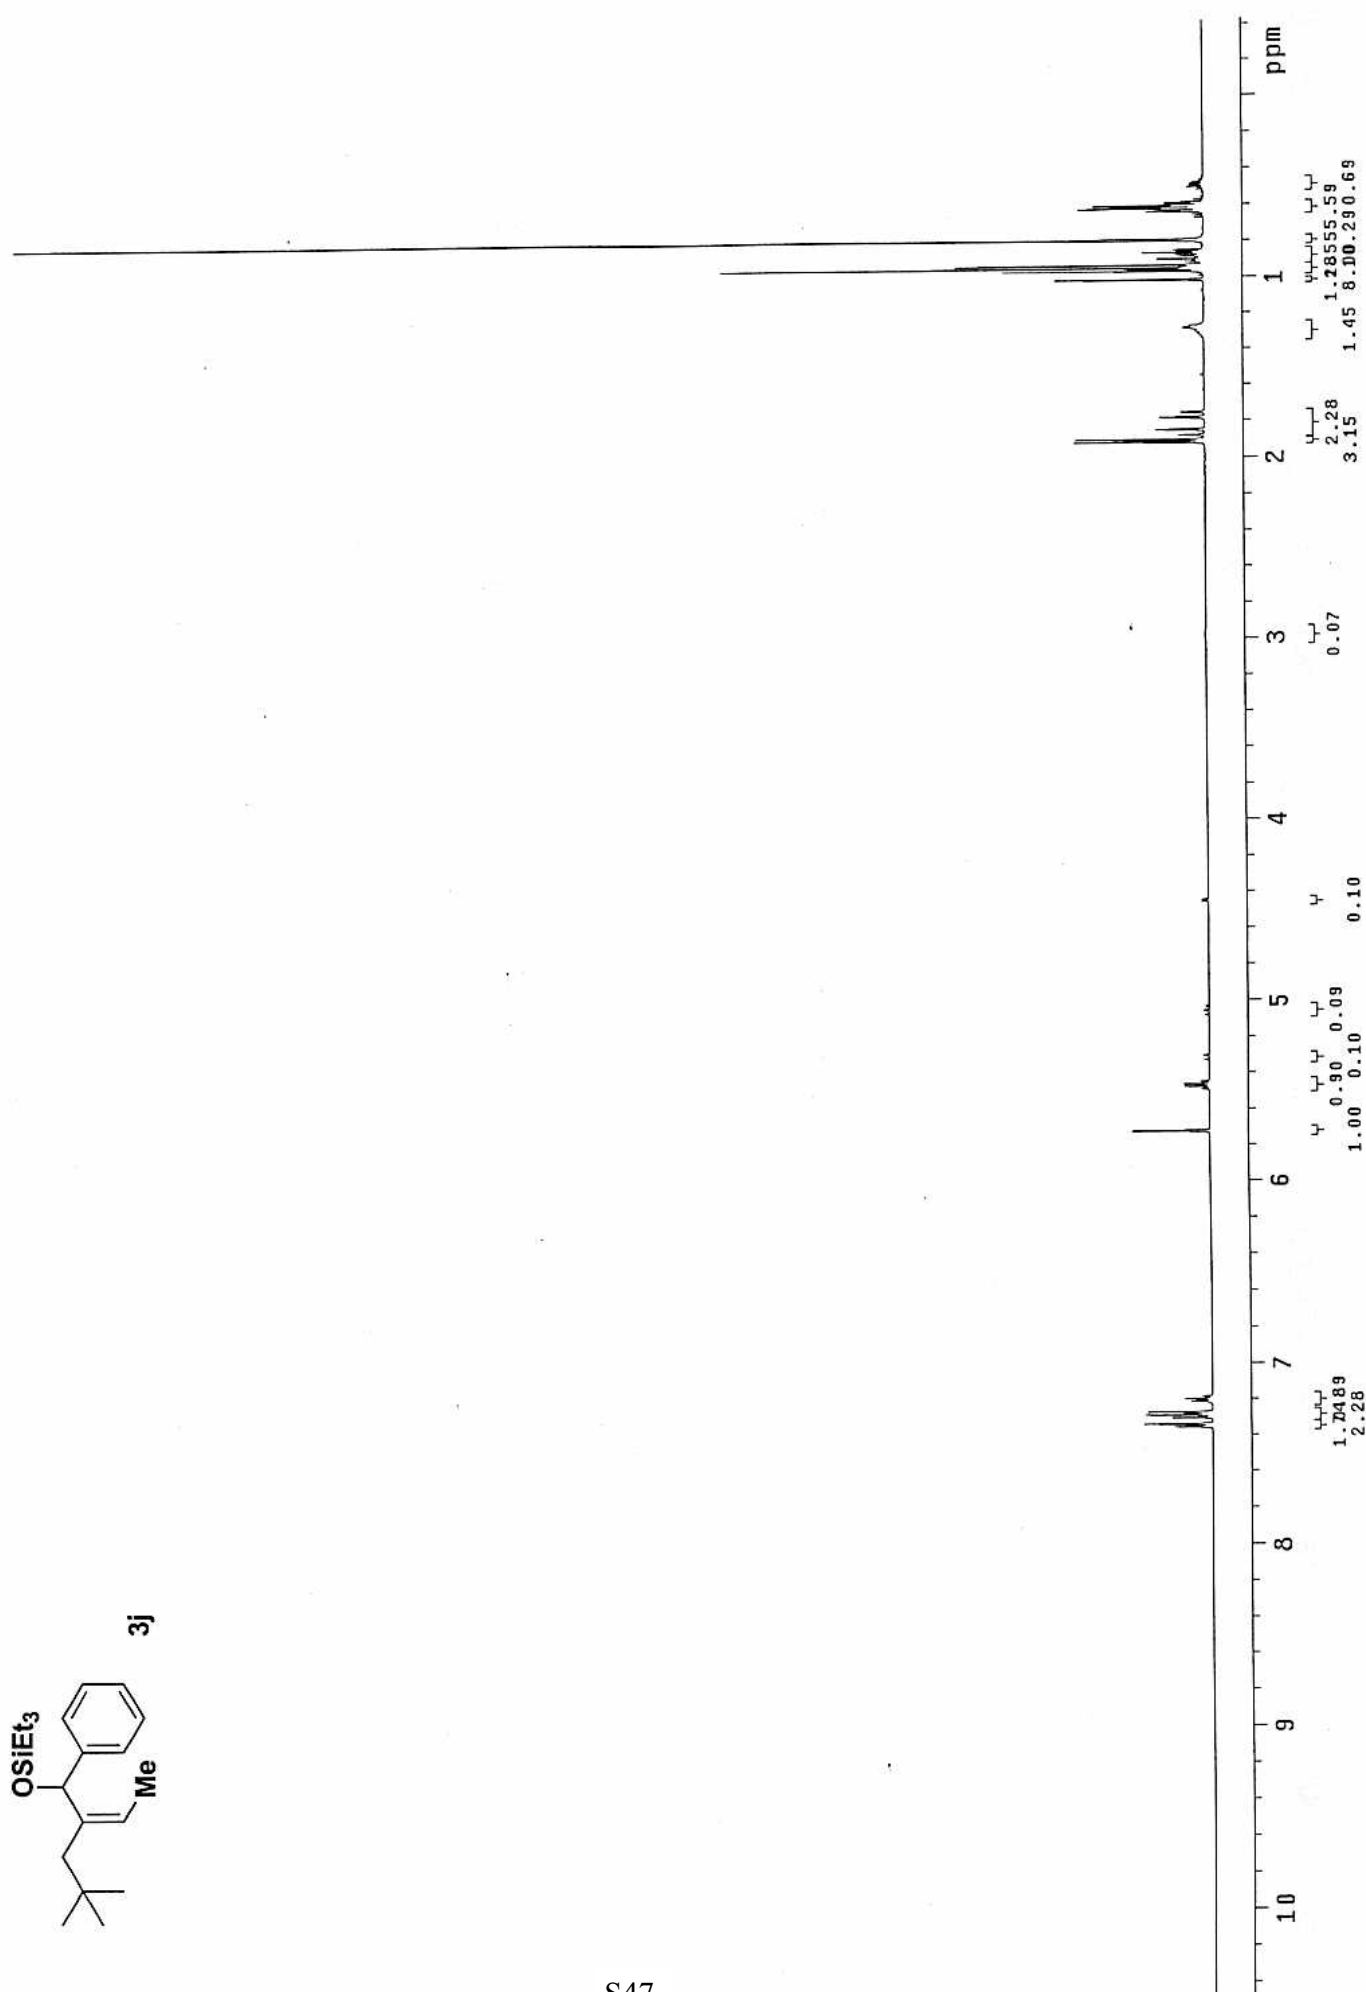

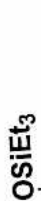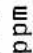



SN050526 ester

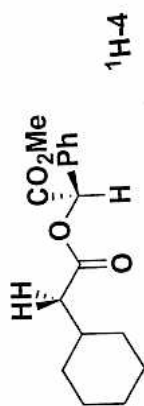

<sup>1</sup>H-4

C<sub>6</sub>D<sub>6</sub>

Current Data Parameters  
NAME SN526-H  
EXPNO 2  
PROCNO 1

F2 - Acquisition Parameters

Date\_ 20050329  
Time 21.02  
INSTRUM spect  
PROBHD 5 mm QNP 1H/1  
PULPROG zg30  
TD 55536  
SOLVENT C6D6  
NS 16  
DS 2  
SWH 8278.146 Hz  
FIDRES 0.126314 Hz  
AQ 3.9584243 sec  
RG 90.5  
DW 60.400 usec  
DE 5.00 usec  
TE 712.3 K  
D1 1.00000000 sec  
MCREST 0.00000000 sec  
MCWRK 0.01500000 sec

===== CHANNEL f1 =====  
NUC1 1H  
P1 9.88 usec  
PL1 3.00 dB  
SFO1 400.1324710 MHz

F2 - Processing parameters

SI 32768  
SF 400.1300455 MHz  
WDW EM  
SSB 0  
LB 0.30 Hz  
GB 0  
PC 1.00  
1D NMR plot parameters  
CX 20.00 cm  
CY 12.50 cm  
F1P 10.000 ppm  
F1 4001.30 Hz  
F2P 0.000 ppm  
F2 0.00 Hz  
PPHMC 0.50000 ppm/cm  
HZCM 200.06502 Hz/cm

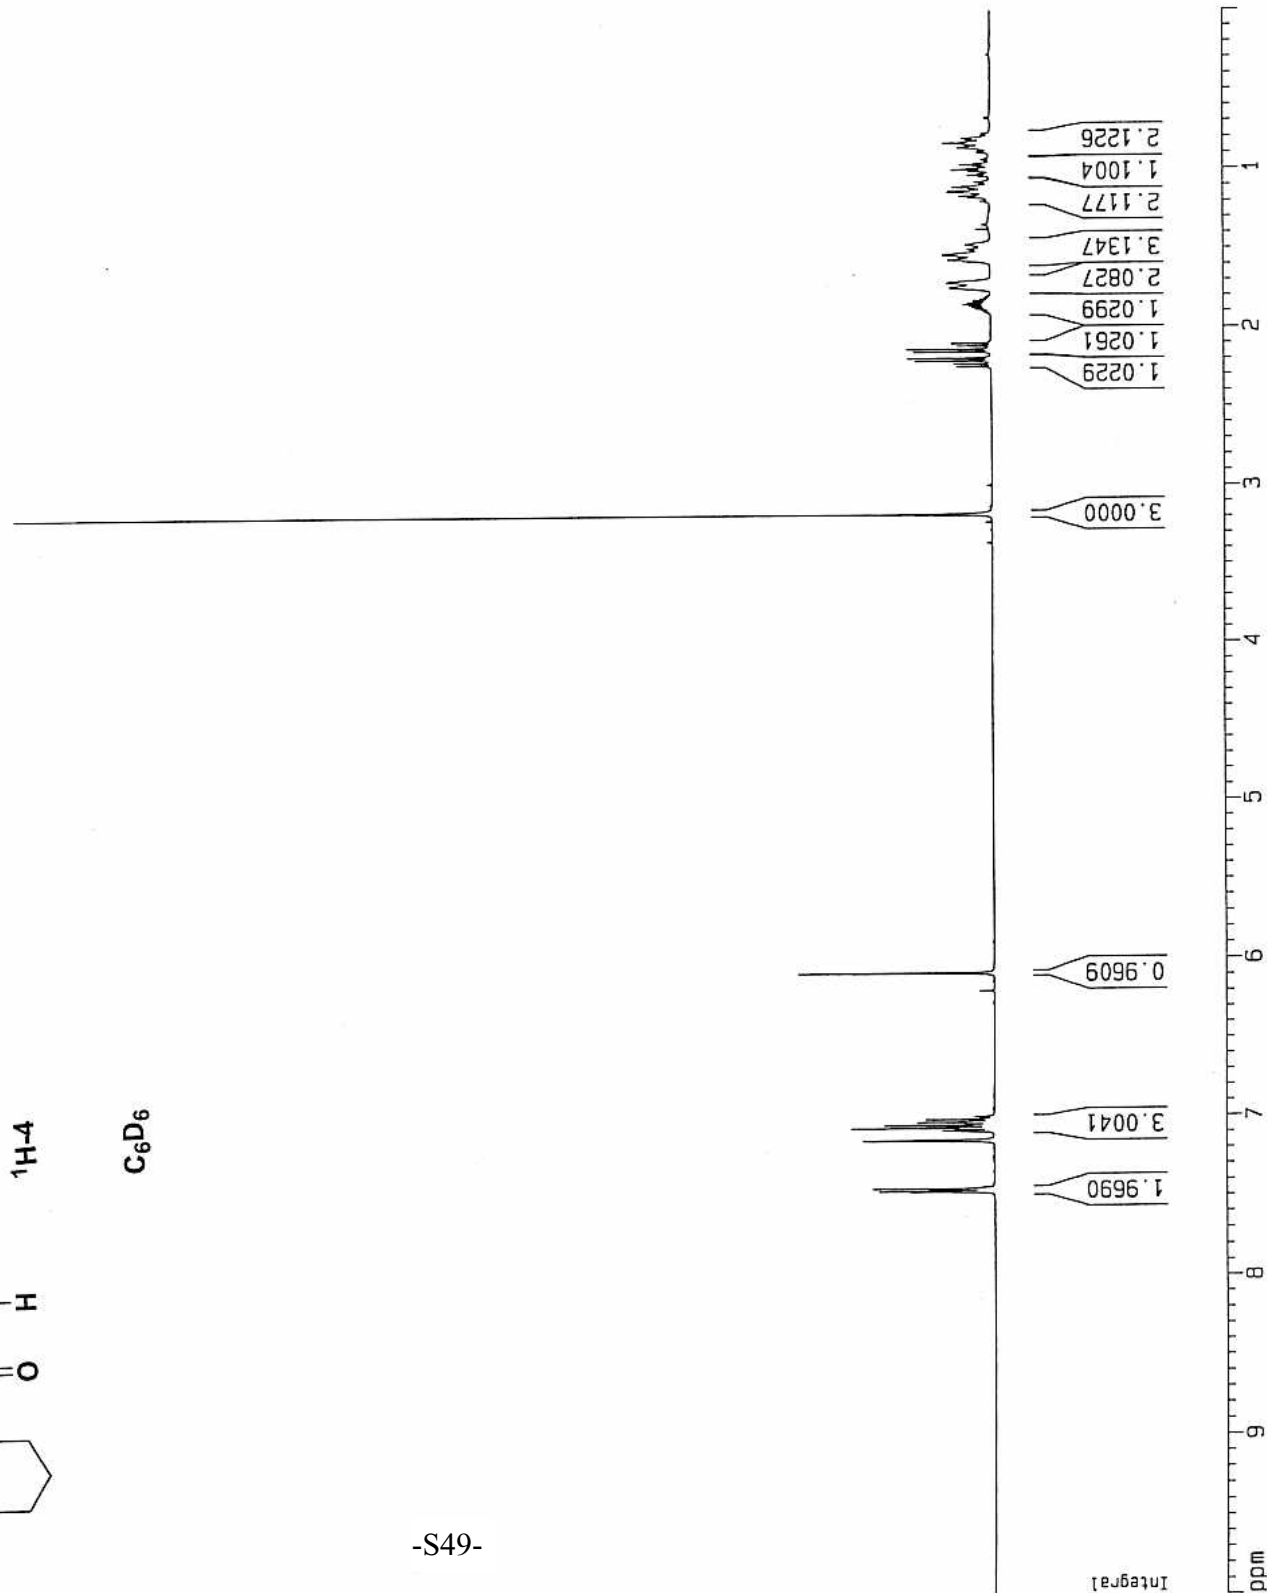

SN050526

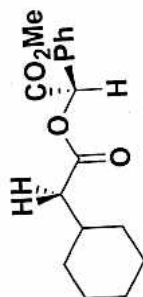

<sup>1</sup>H-4

CDCl<sub>3</sub>

Current Data Parameters  
 NAME SN526-H  
 EXPNO 1  
 PROCNO 1  
 F2 - Acquisition Parameters  
 Date\_ 20050324  
 Time 22.09  
 INSTRUM spect  
 PROBHD 5mm BBO BB-1  
 PULPROG zg30  
 TD 65536  
 SOLVENT CDCl<sub>3</sub>  
 NS 16  
 DS 2  
 SWH 8278.145 Hz  
 FIDRES 0.126314 Hz  
 AQ 3.9584243 sec  
 RG 45.3  
 DW 60.400 usec  
 DE 6.00 usec  
 TE 300.0 K  
 D1 1.00000000 sec

===== CHANNEL f1 =====  
 NUC1 1H  
 P1 7.90 usec  
 PL1 0.00 dB  
 SF01 400.1324710 MHz

F2 - Processing parameters  
 SI 32768  
 SF 400.1300056 MHz  
 WDW EM  
 SSB 0  
 LB 0.30 Hz  
 GB 0  
 PC 1.00  
 1D NMR plot parameters  
 CX 20.00 cm  
 F1p 11.000 ppm  
 F1 4401.43 Hz  
 F2p 0.000 ppm  
 F2 0.00 Hz  
 PPMCM 0.55000 ppm/cm  
 HZCM 220.07152 Hz/cm

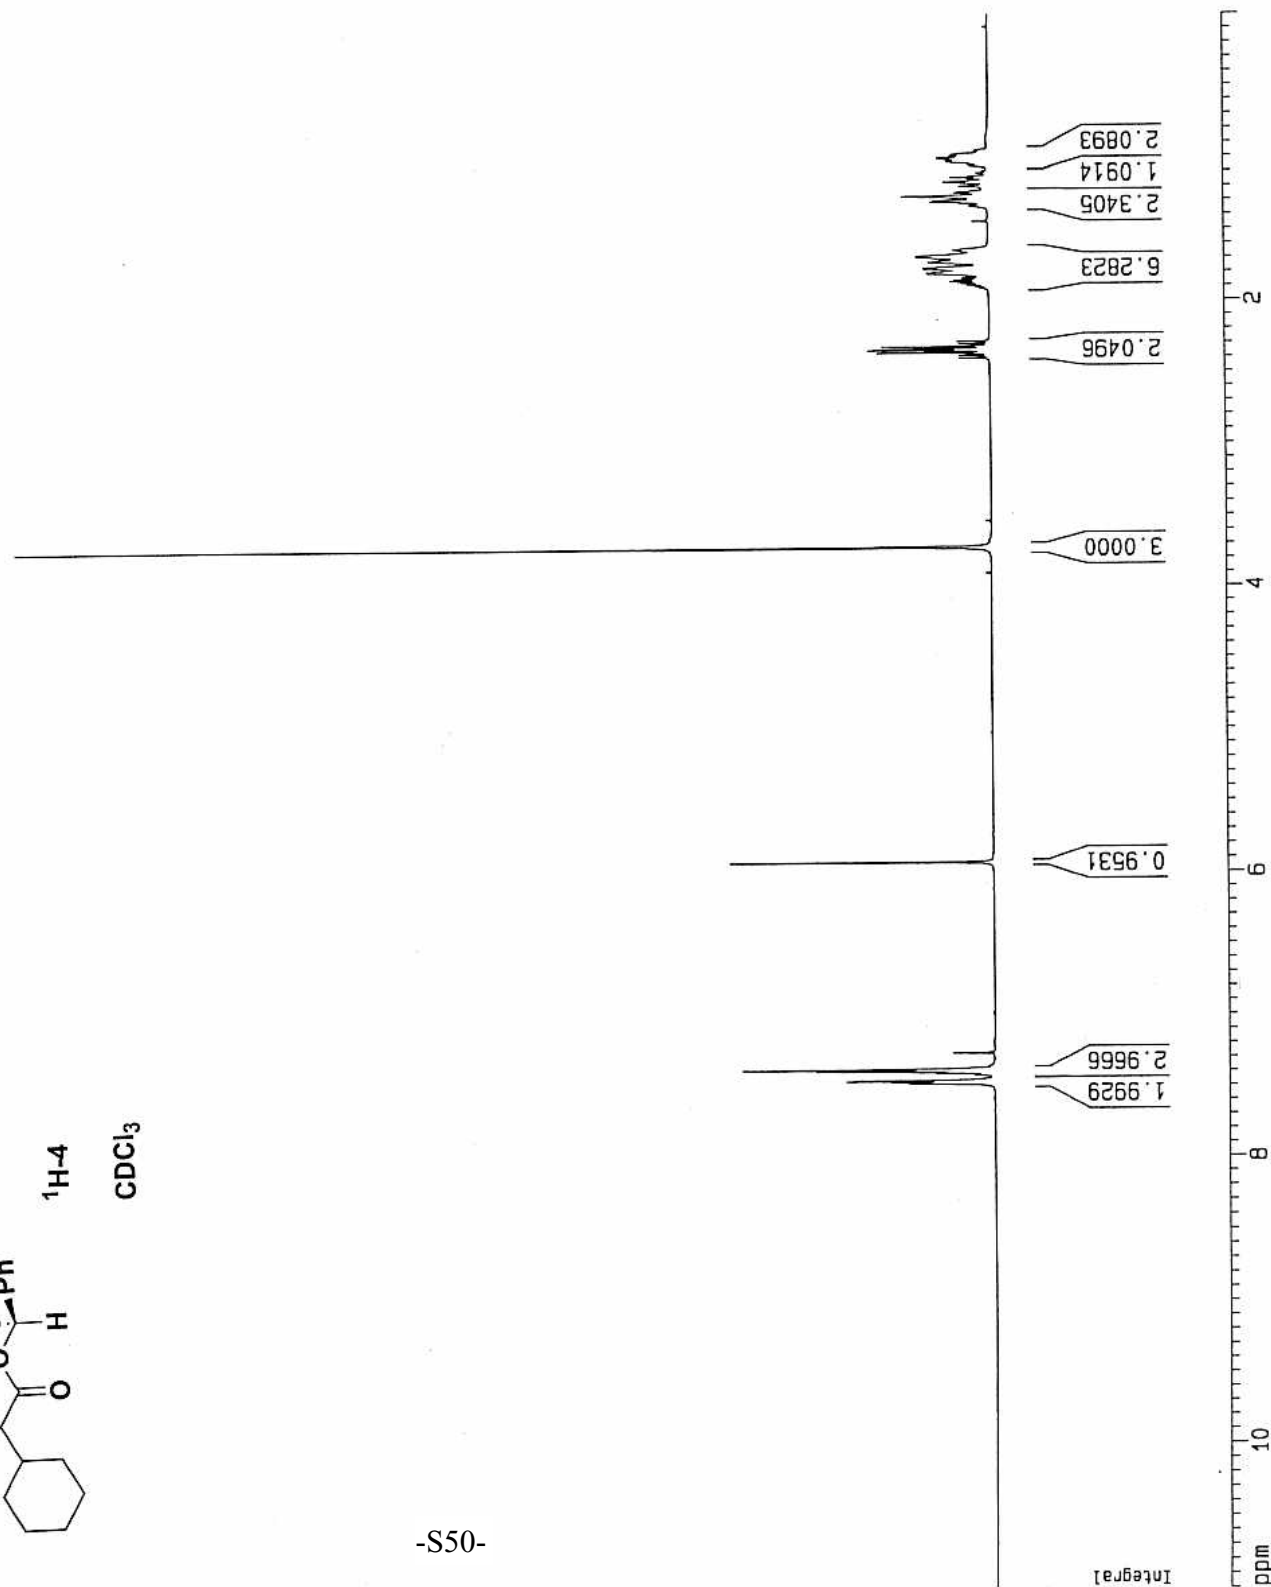

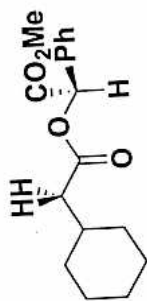

<sup>1</sup>H-4

CDCl<sub>3</sub>

SN050526

Current Data Parameters  
NAME SN526-C  
EXPNO 1  
PROCNO 1

F2 - Acquisition Parameters  
Date\_ 20050324  
Time 22.18  
INSTRUM spect  
PROBHD 5mm BBO BB-1  
PULPROG zgpg30  
TD 65536  
SOLVENT CDCl<sub>3</sub>  
NS 128  
DS 4  
SWH 25125.629 Hz  
FIDRES 0.363387 Hz  
AQ 1.3042164 sec  
RG 8192  
DM 19.900 usec  
DE 6.00 usec  
TE 300.0 K  
D1 2.00000000 sec  
d11 0.03000000 sec  
d12 0.00002000 sec

===== CHANNEL f1 =====  
NUC1 <sup>13</sup>C  
P1 15.25 usec  
PL1 3.00 dB  
SF01 100.6237959 MHz

===== CHANNEL f2 =====  
CPDPRG2 waltz16  
NUC2 <sup>1</sup>H  
PCPD2 107.50 usec  
PL2 0.00 dB  
PL12 24.00 dB  
PL13 24.00 dB  
SF02 400.1316005 MHz

F2 - Processing parameters  
SI 32768  
SF 100.6127538 MHz  
WDW EM  
SSB 0  
LB 1.00 Hz  
GB 0  
PC 1.40

1D NMR plot parameters  
CX 20.00 cm  
F1P 210.000 ppm  
F1 21128.68 Hz  
F2P 0.000 ppm  
F2 0.00 Hz  
PPMCM 10.50000 ppm/cm  
HZCM 1056.43396 Hz/cm

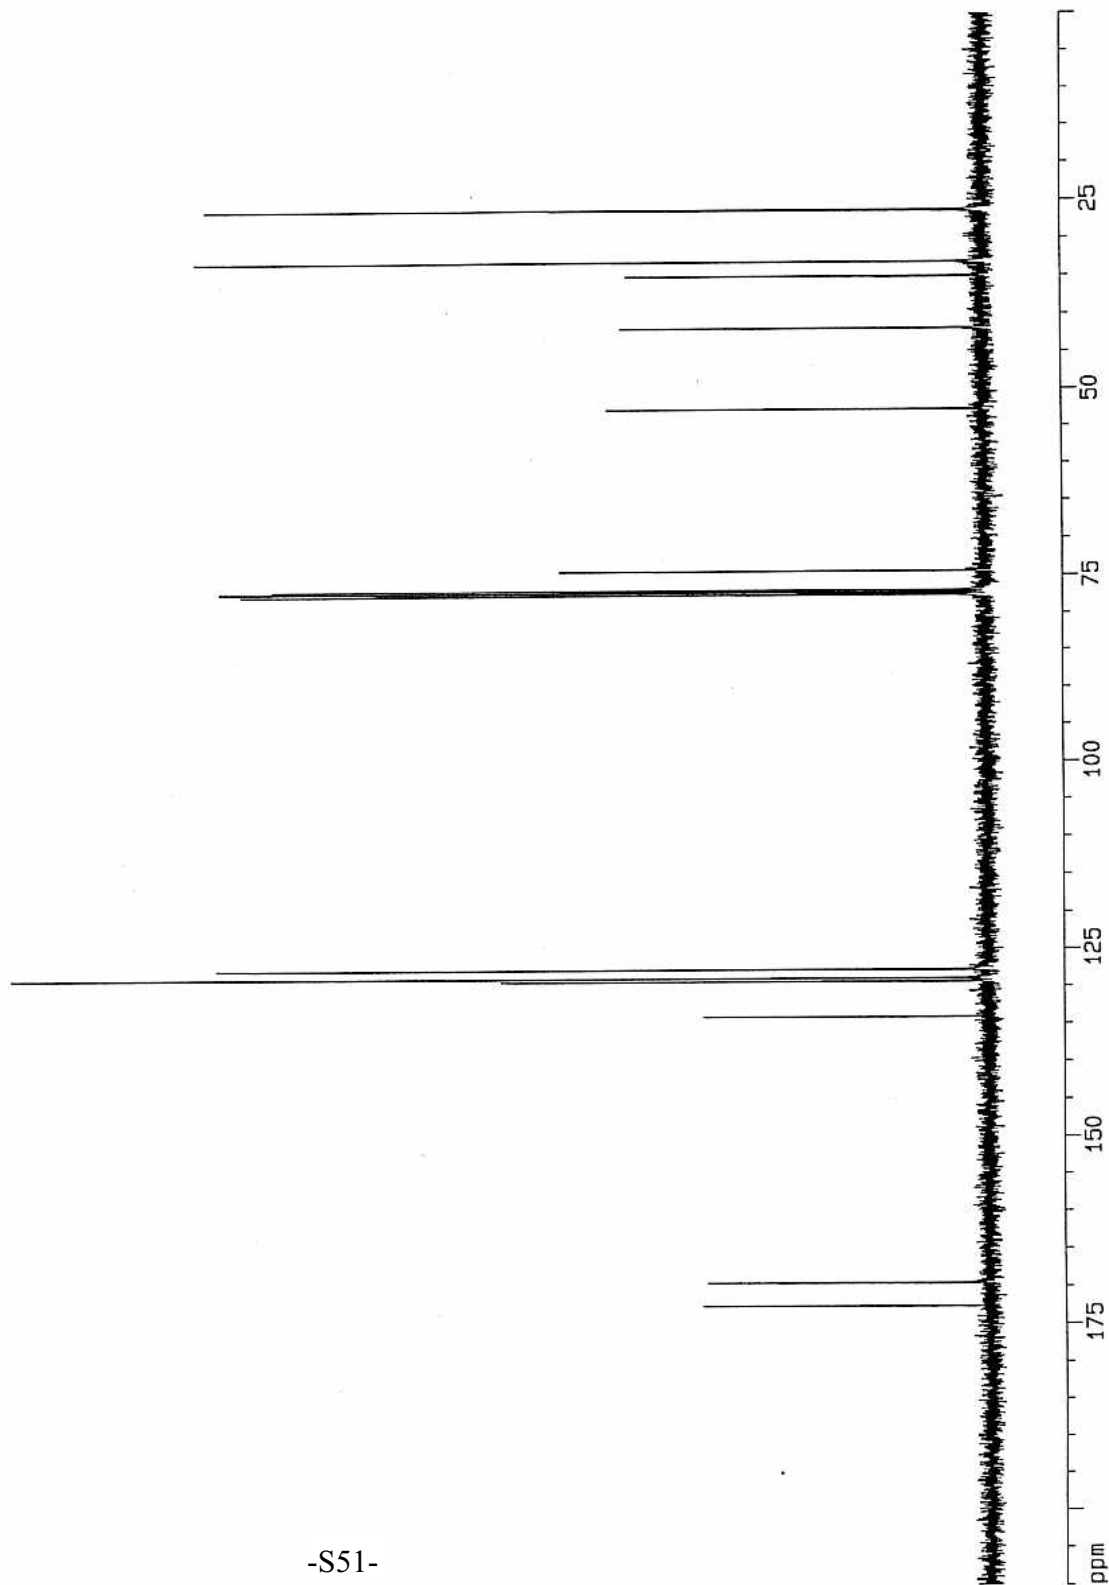

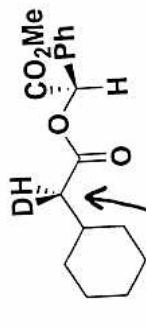

SN050528 ester

4

C<sub>6</sub>D<sub>6</sub>

Current Data Parameters  
NAME SN528-ester-H  
EXPNO 2  
PROCNO 1

F2 - Acquisition Parameters

Date\_ 20050329  
Time 21.18  
INSTRUM spect  
PROBHD 5 mm QNP 1H/1  
PULPROG zg30  
TD 65536  
SOLVENT C6D6  
NS 22  
DS 2  
SWH 8278.146 Hz  
FIDRES 0.126314 Hz  
AQ 3.9584243 sec  
RG 203.2  
DW 60.400 usec  
DE 6.00 usec  
TE 712.3 K  
D1 1.00000000 sec  
MCREST 0.00000000 sec  
MCWRK 0.01500000 sec

===== CHANNEL f1 =====

NUC1 1H  
P1 9.88 usec  
PL1 3.00 dB  
SF01 400.1324710 MHz

F2 - Processing parameters

SI 32768  
SF 400.1300443 MHz  
WDW EM  
SSB 0  
LB 0.30 Hz  
GB 0  
PC 1.00

1D NMR plot parameters

CX 20.00 cm  
CY 12.50 cm  
F1P 10.000 ppm  
F1 4001.30 Hz  
F2P 0.000 ppm  
F2 0.00 Hz  
PPMCM 0.50000 ppm/cm  
HZCM 200.06502 Hz/cm

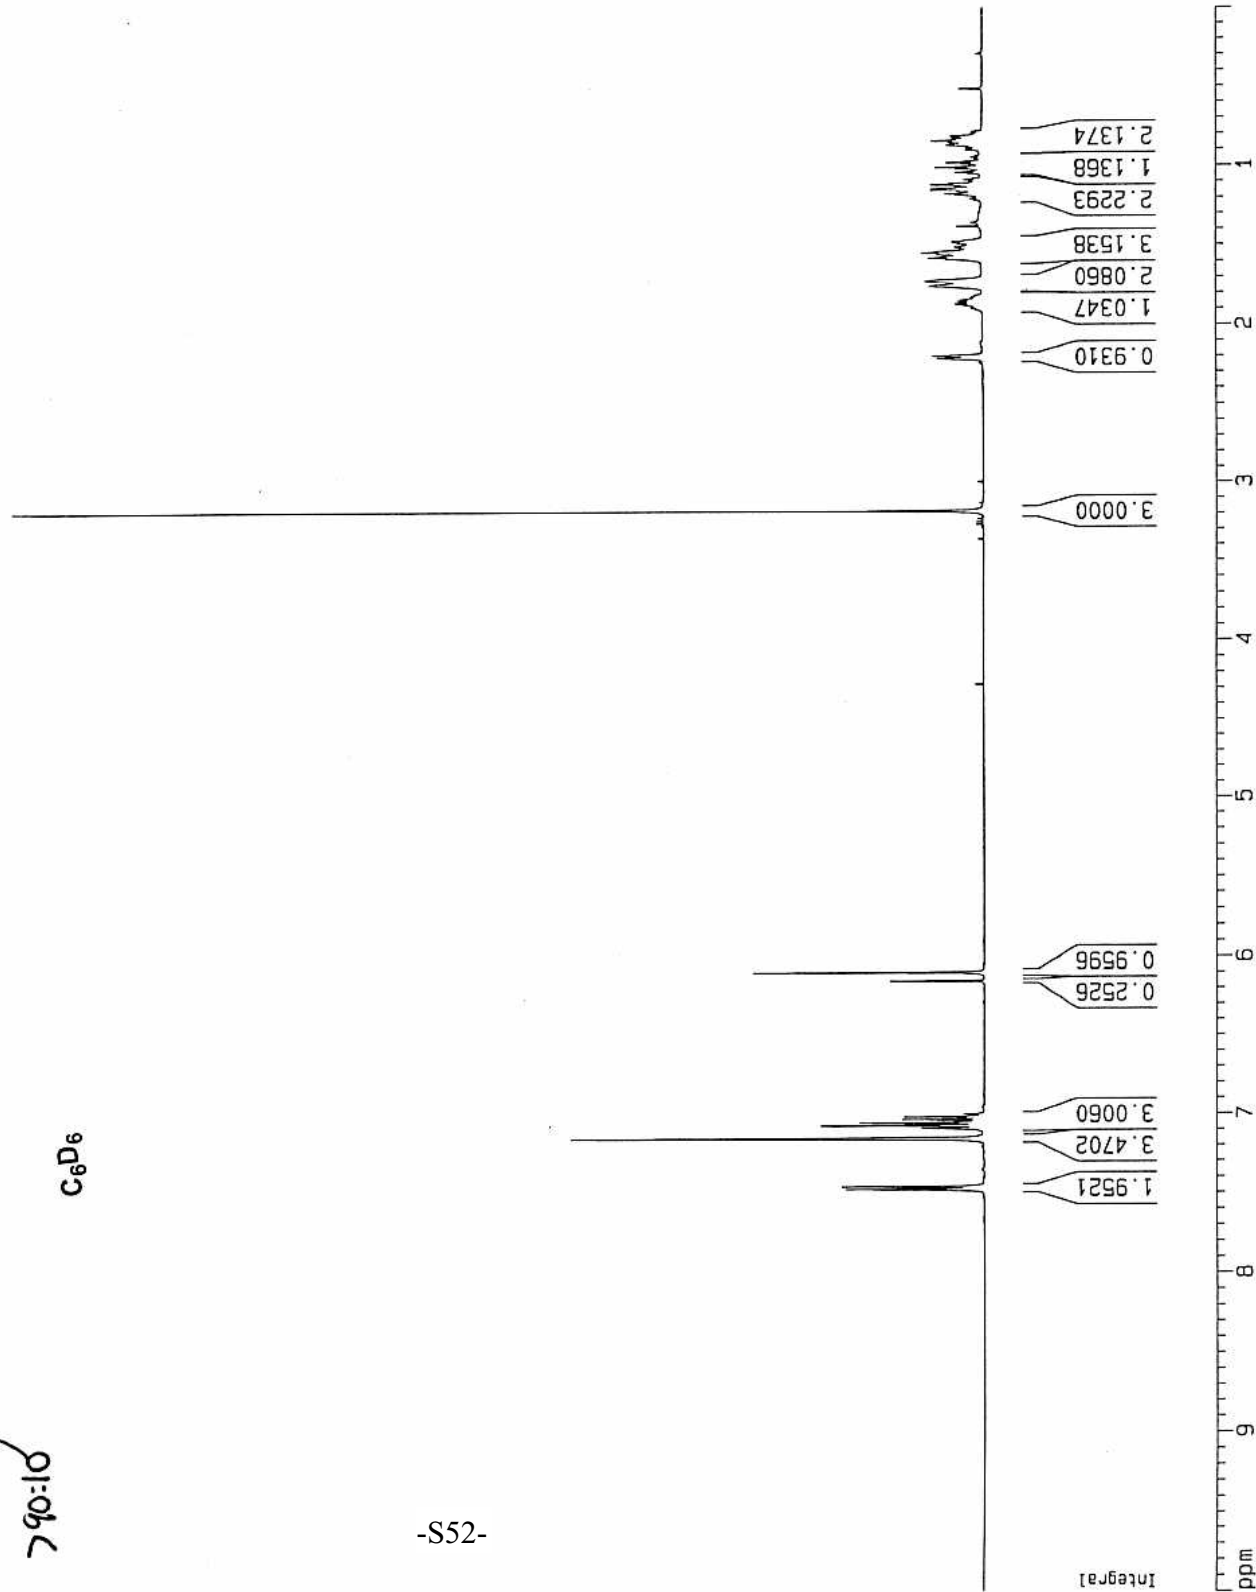

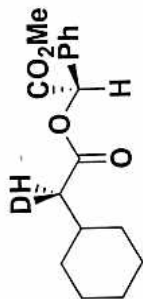

4

SN050528 ester

CDCl<sub>3</sub>

Current Data Parameters  
NAME SN528-ester-H  
EXPNO 1  
PROCNO 1

F2 - Acquisition Parameters

Date\_ 20050328  
Time 12.07  
INSTRUM spect  
PROBHD 5mm BB-1  
PULPROG zg30  
TD 65536  
SOLVENT CDCl<sub>3</sub>  
NS 17  
DS 2  
SWH 8278.146 Hz  
FIDRES 0.126314 Hz  
AQ 3.9584243 sec  
RG 101.6  
DW 60.400 usec  
DE 6.00 usec  
TE 300.0 K  
D1 1.00000000 sec

===== CHANNEL f1 =====  
NUC1 1H  
P1 7.90 usec  
PL1 0.00 dB  
SF01 400.1324710 MHz

F2 - Processing parameters

SI 32768  
SF 400.1300055 MHz  
WDW EM  
SSB 0  
LB 0.30 Hz  
GB 0  
PC 1.00

1D NMR plot parameters

CX 20.00 cm  
F1P 11.000 ppm  
F1 4401.43 Hz  
F2P 0.000 ppm  
F2 0.00 Hz  
PPMCM 0.55000 ppm/cm  
HZCM 220.07152 Hz/cm

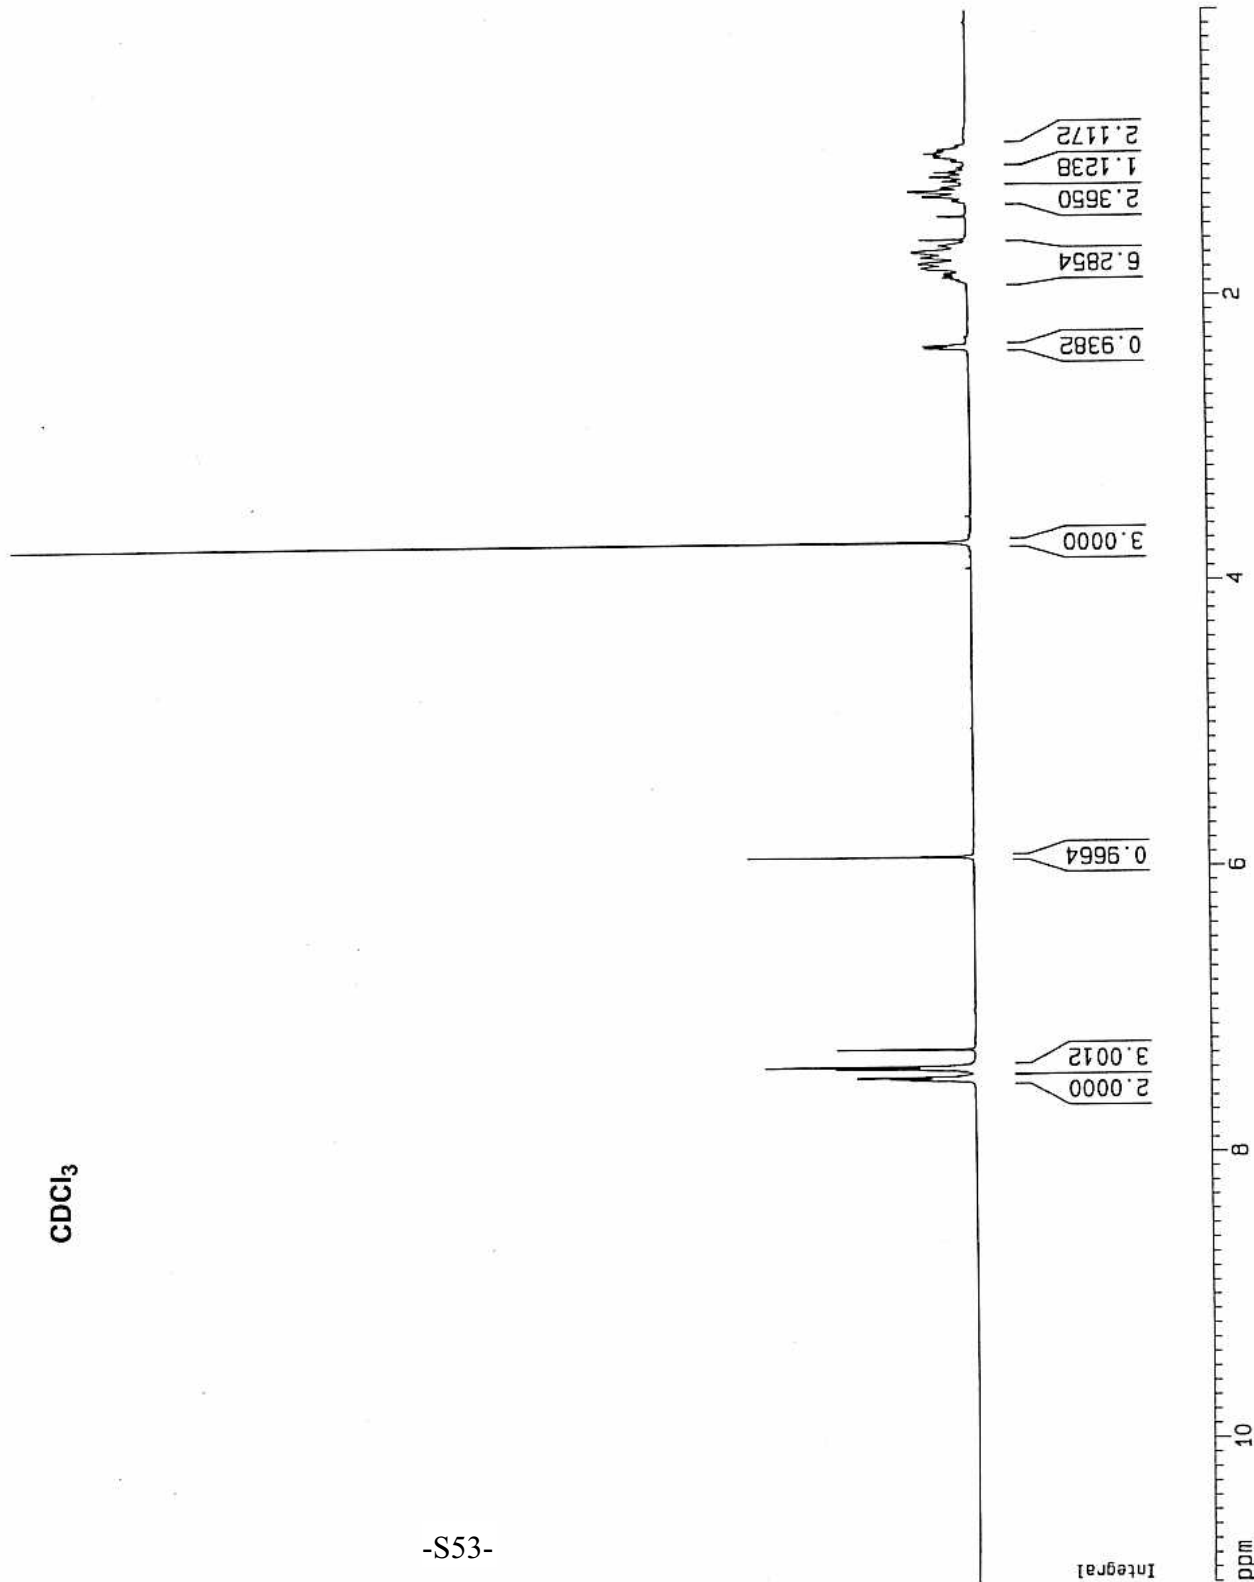

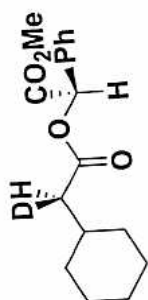

4

CDCl<sub>3</sub>

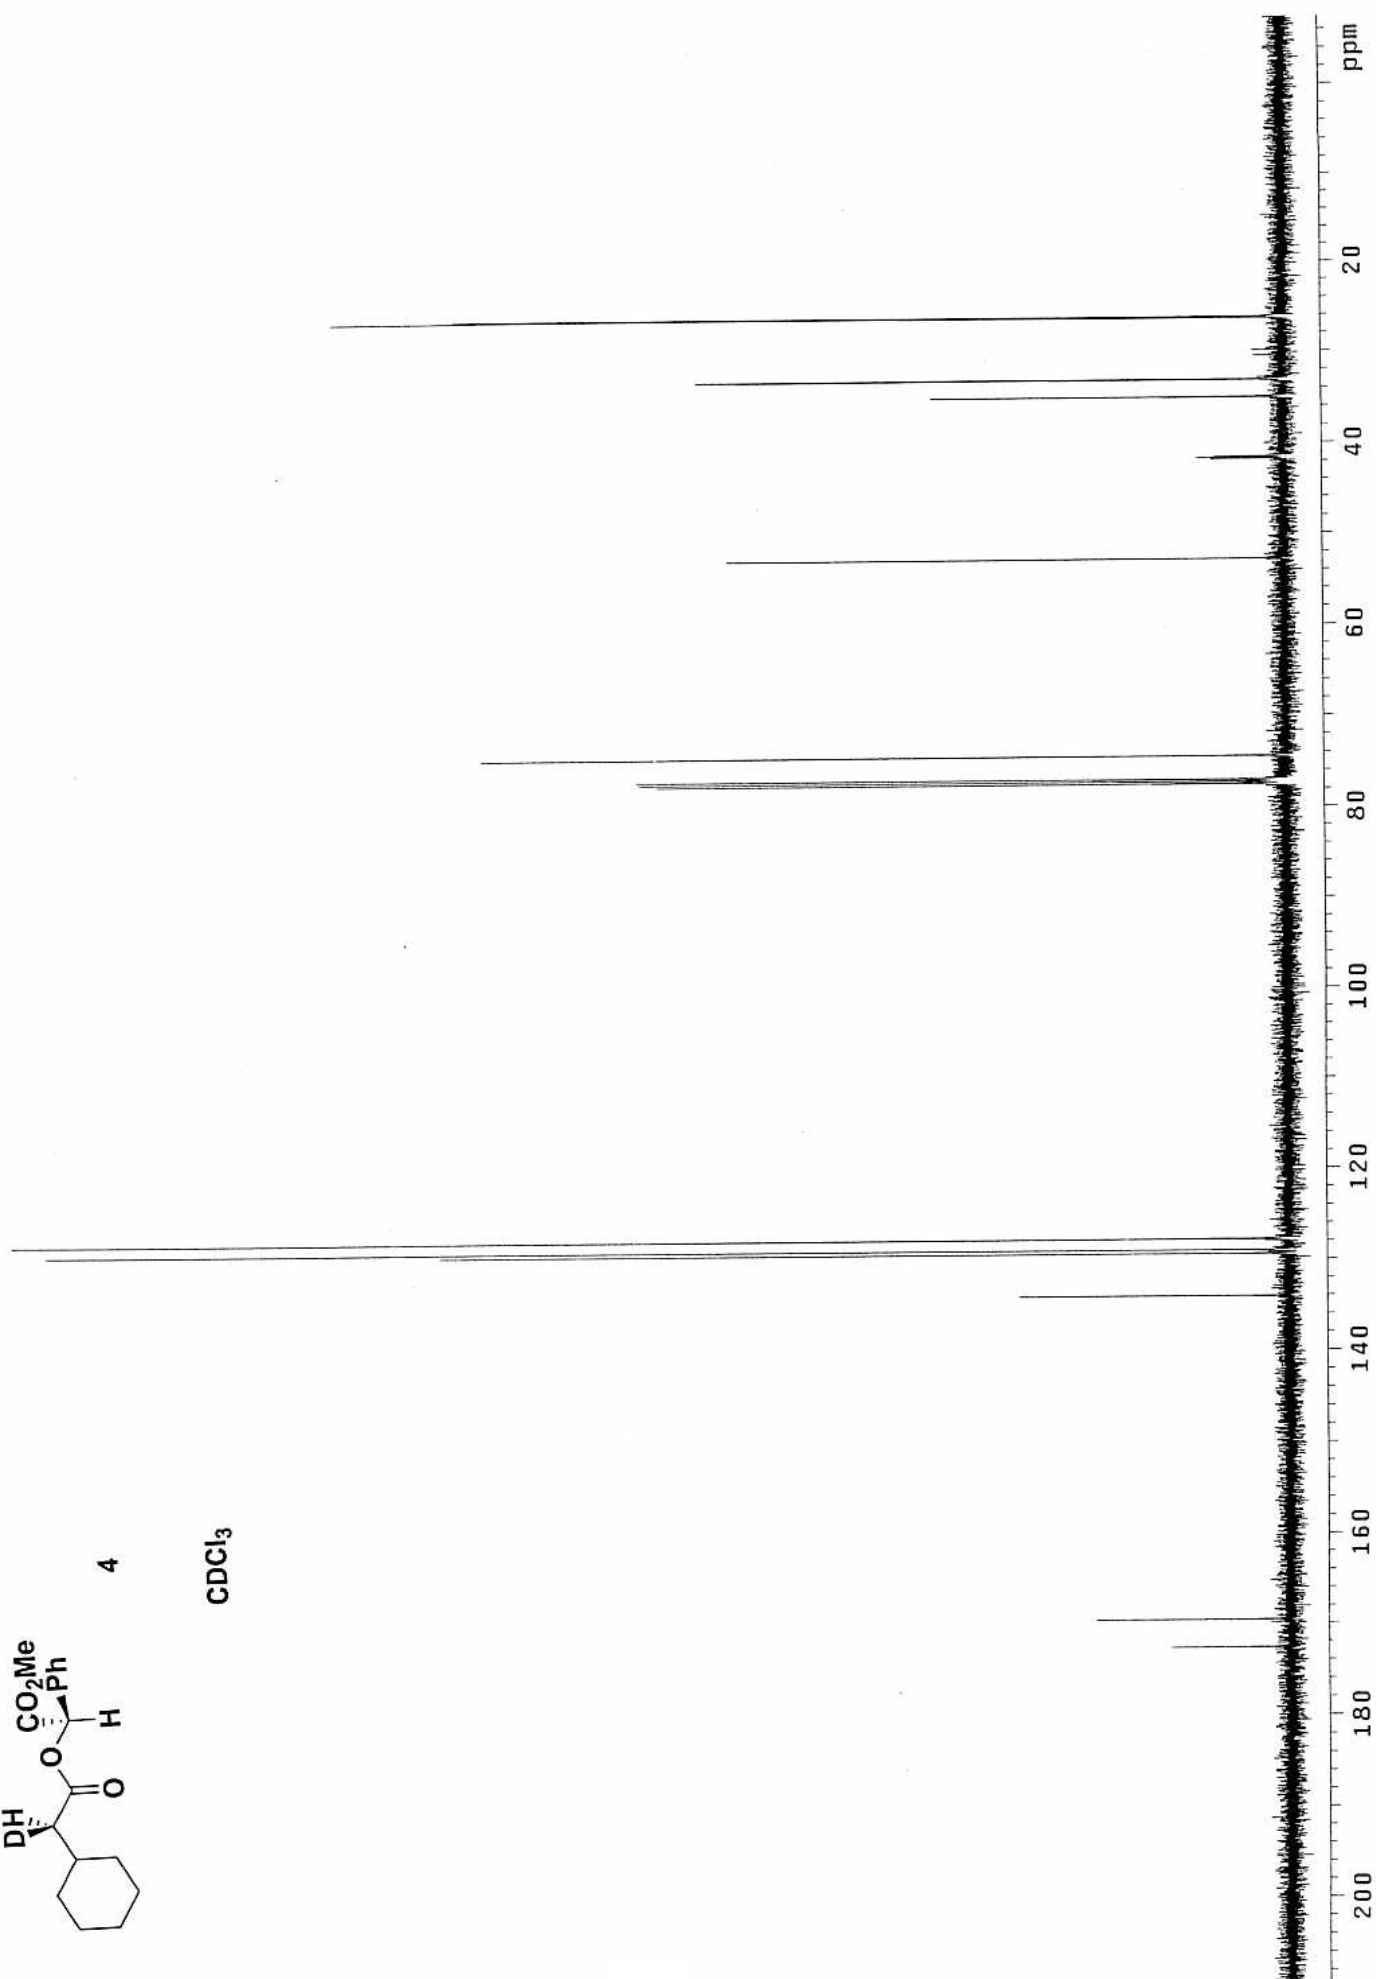

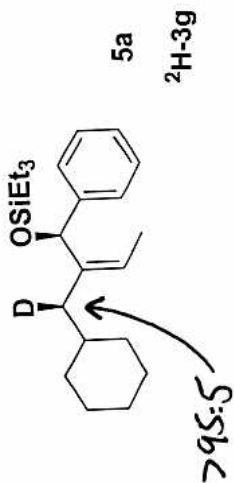

-S55-

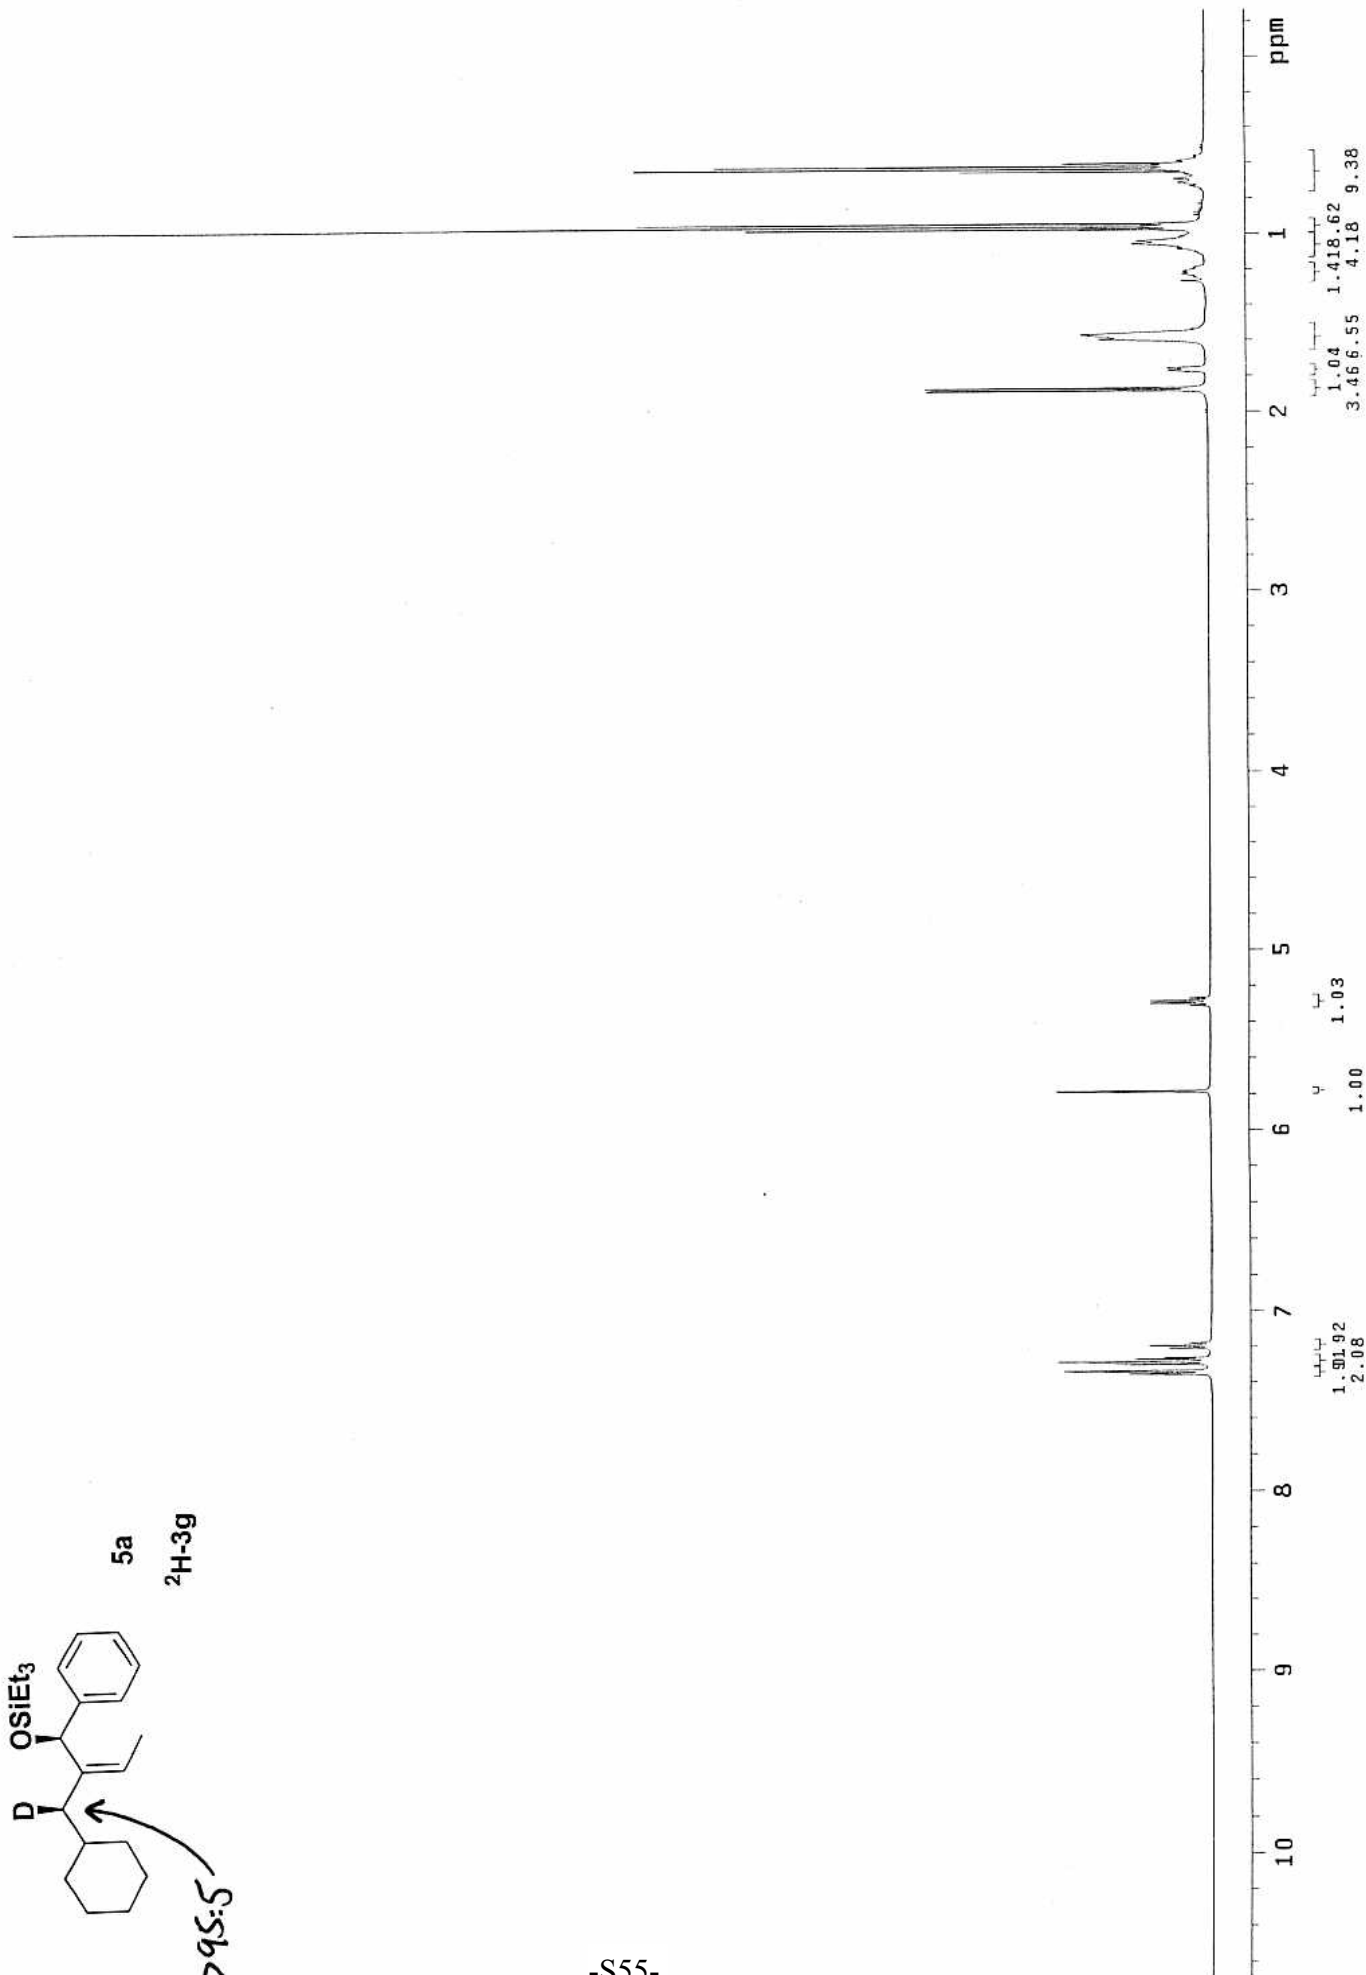

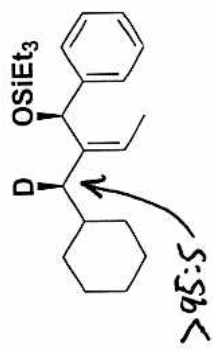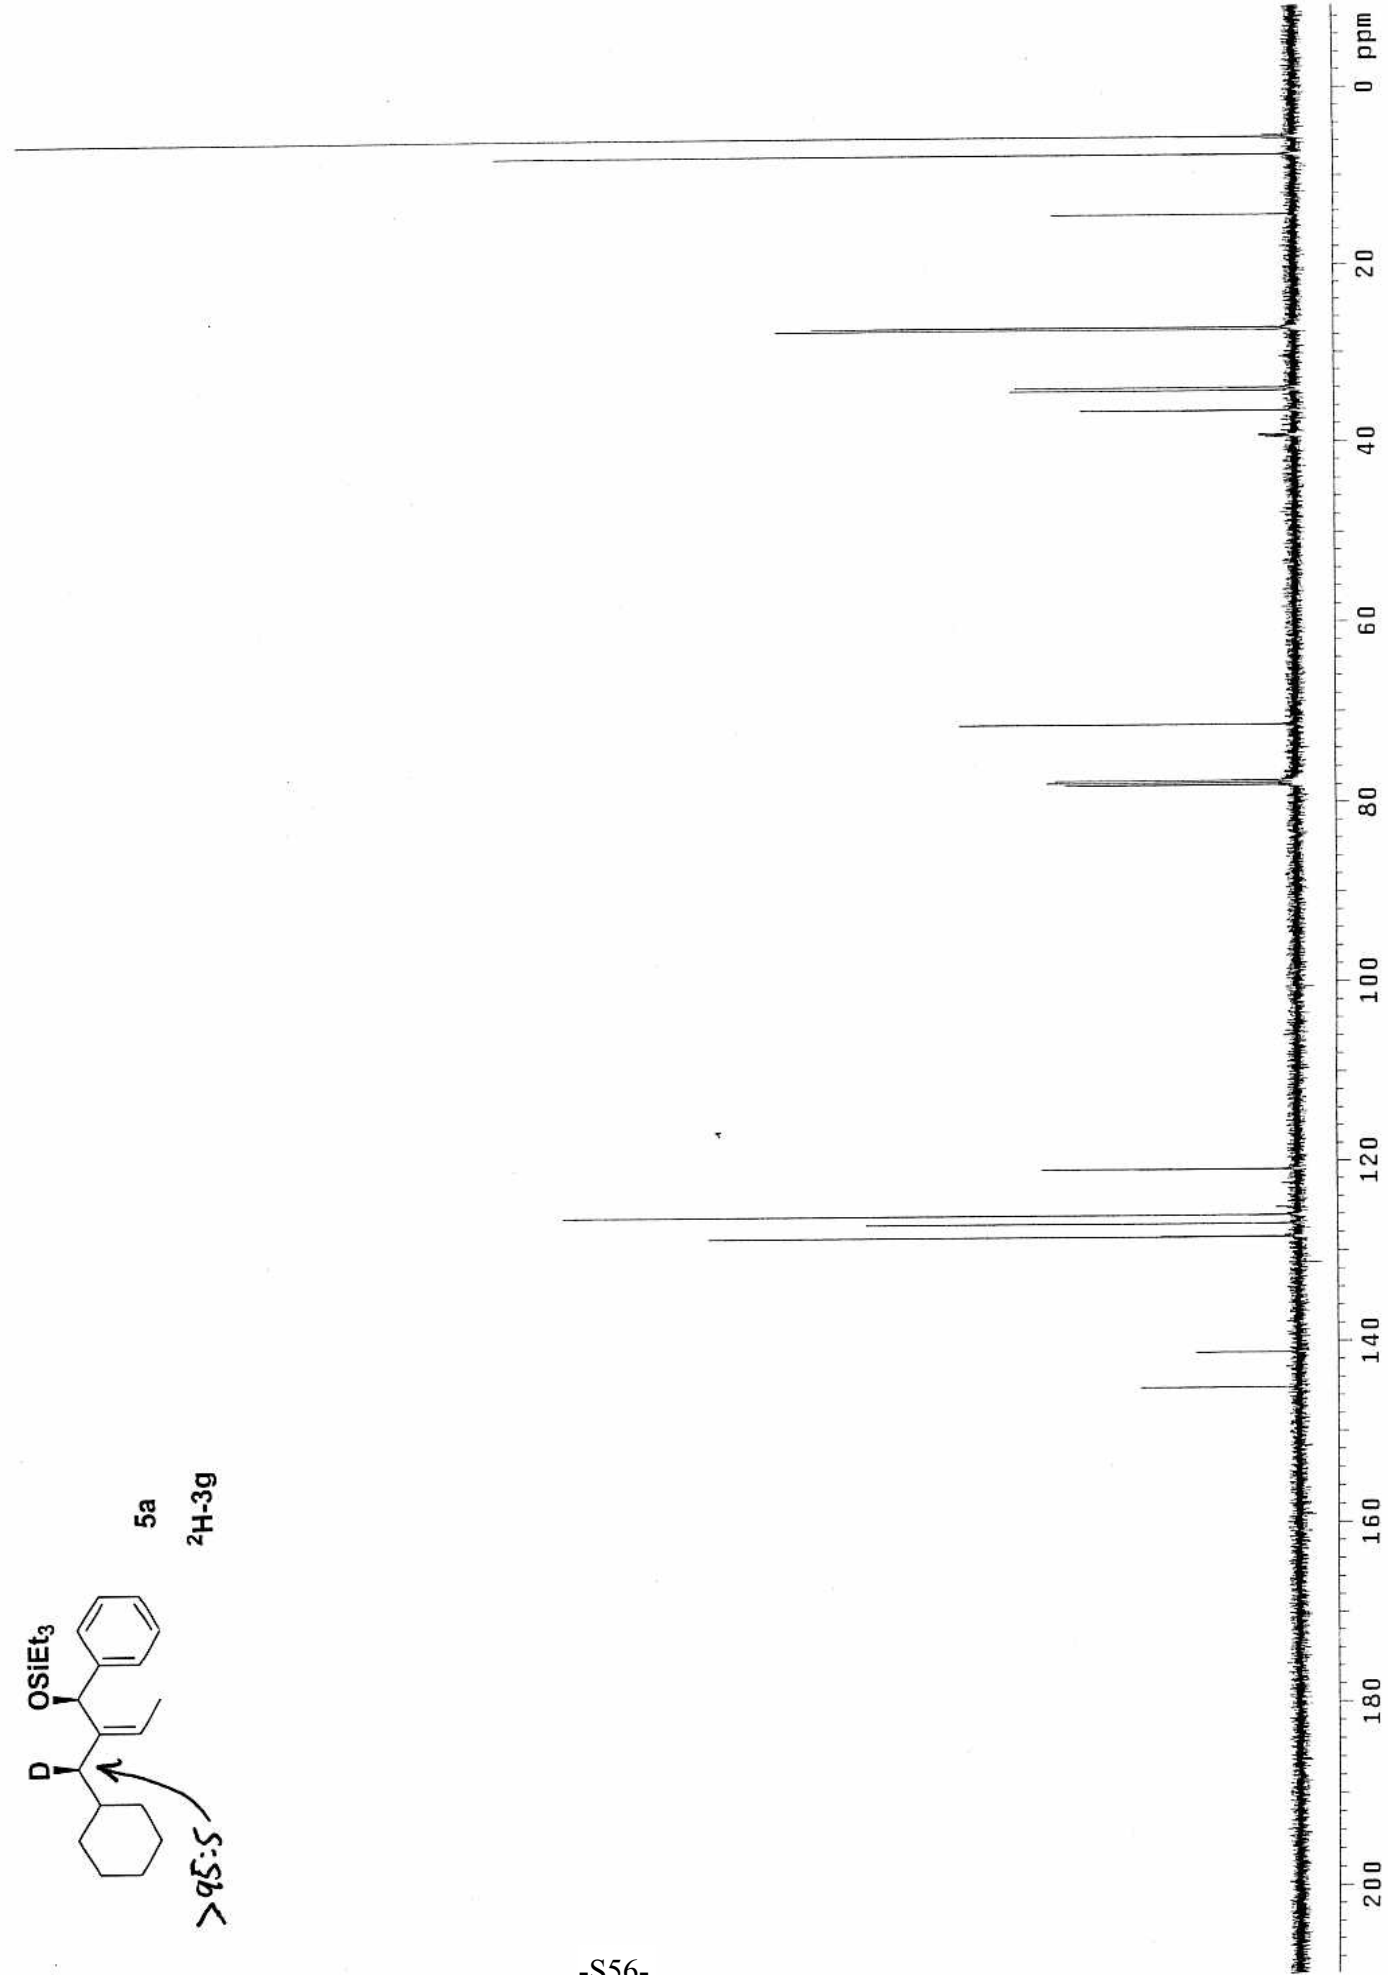



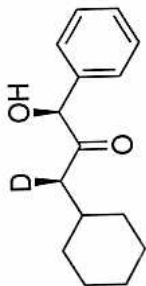

5b

SN050528 ozonolysis

Current Data Parameters  
 NAME SN528-03-H  
 EXPNO 1  
 PROCNO 1

F2 - Acquisition Parameters  
 Date\_ 20050326  
 Time 21.03  
 INSTRUM spect  
 PROBHD 5mm BBO BB-1  
 PULPROG zg30  
 TD 65536  
 SOLVENT CDCl3  
 NS 16  
 DS 2  
 SWH 8278.146 Hz  
 FIDRES 0.126314 Hz  
 AQ 3.9584243 sec  
 RG 35.9  
 DW 60.400 usec  
 DE 6.00 usec  
 TE 300.0 K  
 D1 1.0000000 sec

===== CHANNEL f1 =====  
 NUC1 <sup>1</sup>H  
 P1 7.90 usec  
 PL1 0.00 dB  
 SF01 400.1324710 MHz

F2 - Processing parameters  
 SI 32768  
 SF 400.1300054 MHz  
 WDW EM  
 SSB 0  
 LB 0.30 Hz  
 GB 0  
 PC 1.00

1D NMR plot parameters  
 CX 20.00 cm  
 F1P 10.000 ppm  
 F1 4001.30 Hz  
 F2P 0.000 ppm  
 F2 0.00 Hz  
 PPMCM 0.50000 ppm/cm  
 HZCM 200.06500 Hz/cm

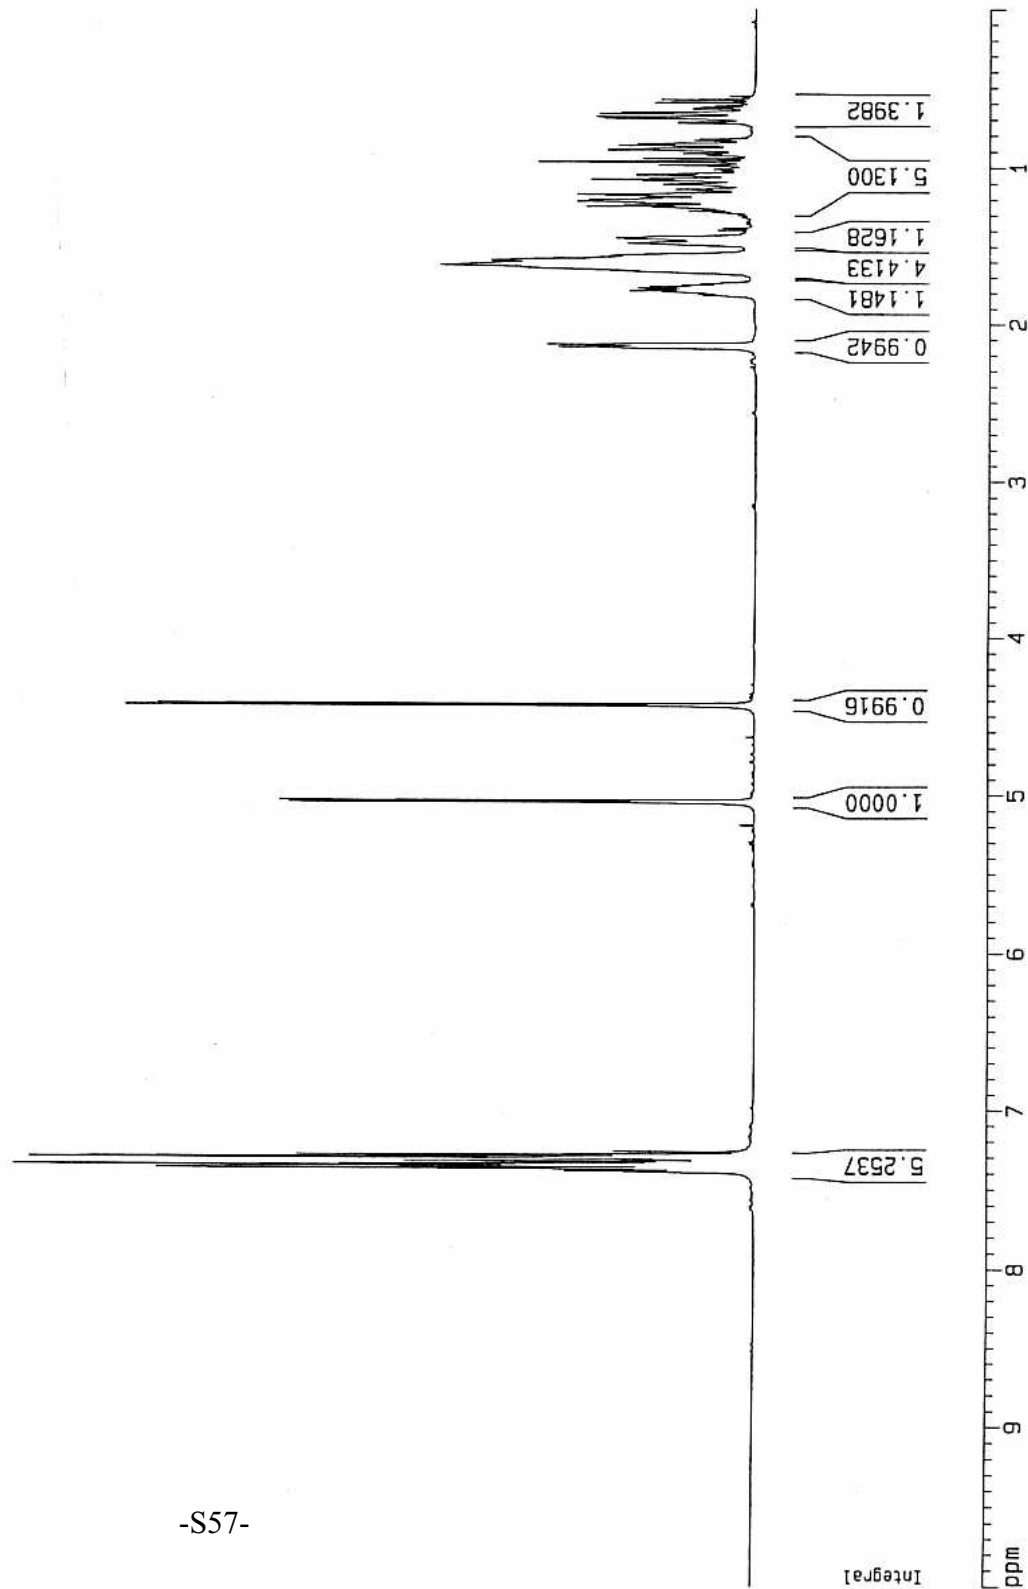

SNO50528 ozonolysis

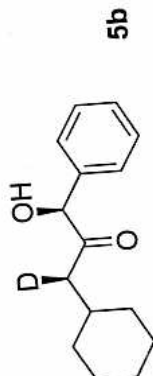

Current Data Parameters  
NAME SNG28-03-C  
EXPNO 1  
PROCNO 1

F2 - Acquisition Parameters  
Date\_ 20050326  
Time 21.13  
INSTRUM spect  
PROBHD 5mm BBO BB-1  
PULPROG zgpg30  
TD 65536  
SOLVENT CDCl3  
NS 193  
DS 4  
SWH 25125.629 Hz  
FIDRES 0.383387 Hz  
AQ 1.3042164 sec  
RG 2048  
DM 19.900 usec  
DE 6.00 usec  
TE 300.0 K  
D1 2.00000000 sec  
d11 0.03000000 sec  
d12 0.00002000 sec

===== CHANNEL f1 =====  
NUC1 13C  
P1 15.25 usec  
PL1 3.00 dB  
SF01 100.6237959 MHz

===== CHANNEL f2 =====  
CPDPRG2 waltz16  
NUC2 1H  
PCPD2 107.50 usec  
PL2 0.00 dB  
PL12 24.00 dB  
PL13 24.00 dB  
SF02 400.1316005 MHz

F2 - Processing parameters  
SI 32768  
SF 100.6127561 MHz  
WDW EM  
SSB 0  
LB 1.00 Hz  
GB 0  
PC 1.40

1D NMR plot parameters  
CX 20.00 cm  
F1P 220.000 ppm  
F1 22134.81 Hz  
F2P 10.000 ppm  
F2 1005.13 Hz  
PPMCM 10.50000 ppm/cm  
HZCM 1056.43396 Hz/cm

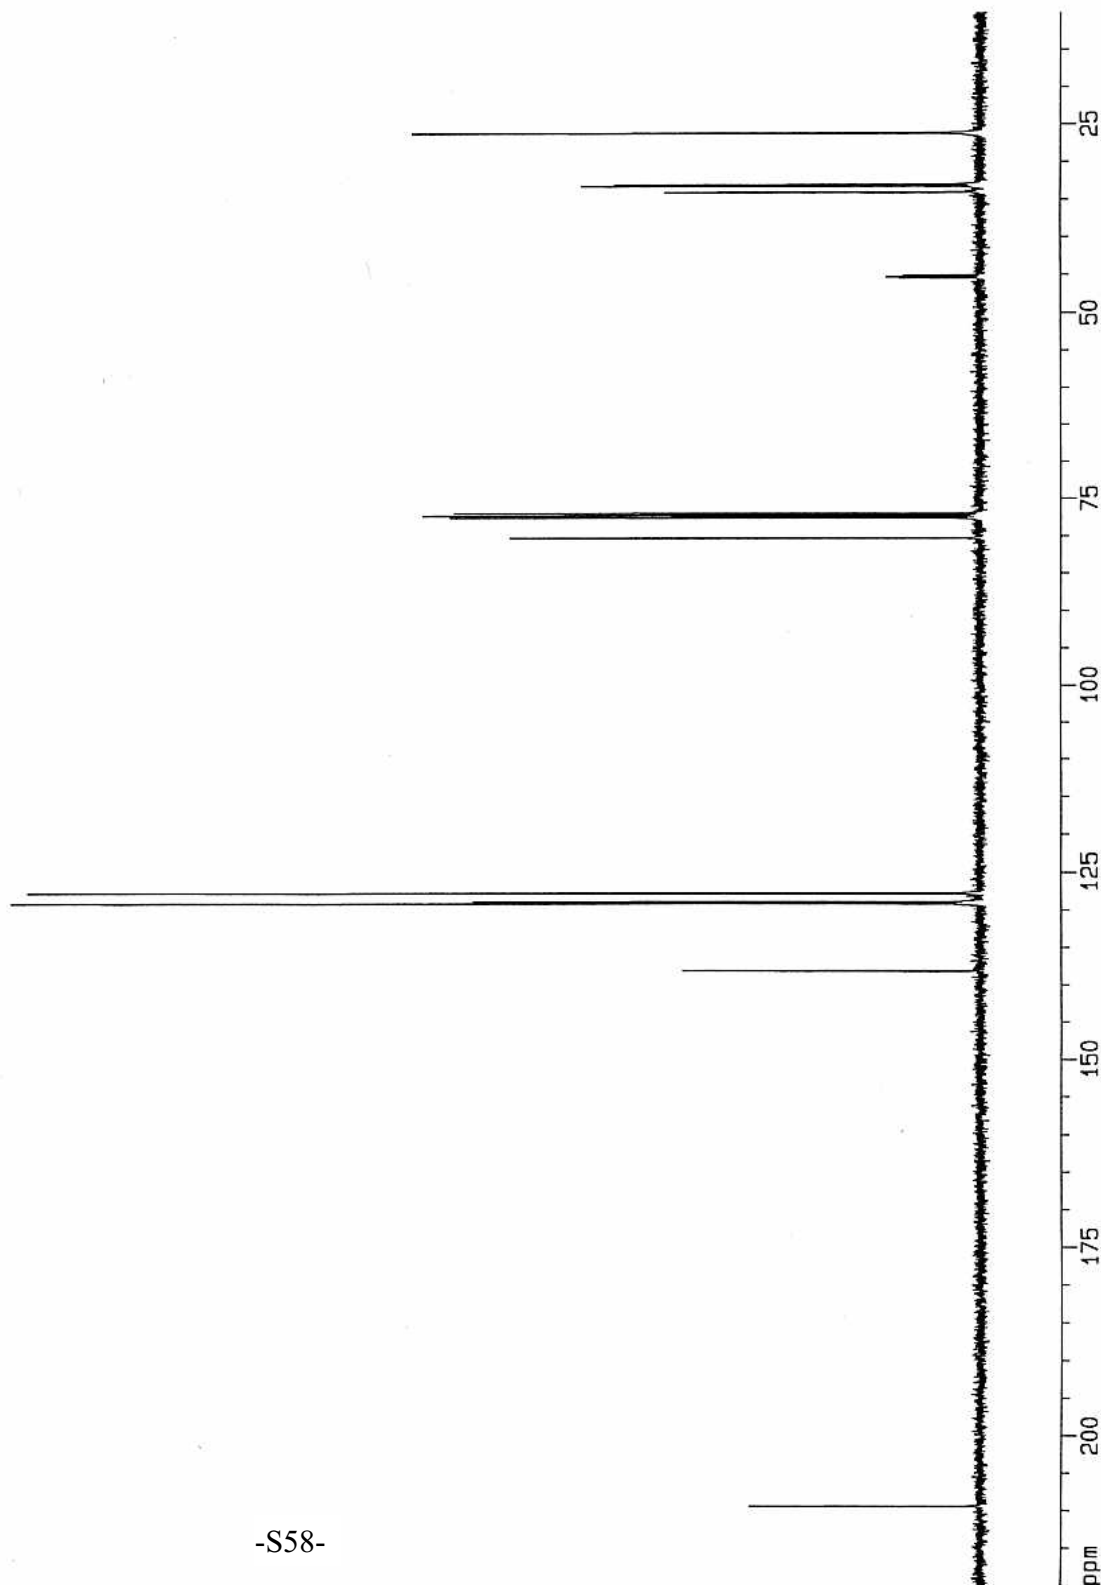

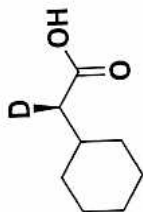

5c

SN050527 acid

Current Data Parameters  
 NAME SN527-acid-H  
 EXPNO 1  
 PROCNO 1

F2 - Acquisition Parameters  
 Date\_ 20050326  
 Time 17.04  
 INSTRUM spect  
 PROBHD 5mm BBO BB-1  
 PULPROG zg30  
 TD 65536  
 SOLVENT CDC13  
 NS 16  
 DS 2  
 SWH 8278.146 Hz  
 FIDRES 0.126314 Hz  
 AQ 3.9584243 sec  
 RG 90.5  
 DW 60.400 usec  
 DE 6.00 usec  
 TE 300.0 K  
 D1 1.00000000 sec

===== CHANNEL f1 =====  
 NUC1 1H  
 P1 7.90 usec  
 PL1 0.00 dB  
 SF01 400.1324710 MHz

F2 - Processing parameters  
 SI 32768  
 SF 400.1300056 MHz  
 WDW EM  
 SSB 0  
 LB 0.30 Hz  
 GB 0  
 PC 1.00

1D NMR plot parameters  
 CX 20.00 cm  
 F1P 13.000 ppm  
 F1 5201.69 Hz  
 F2P 0.000 ppm  
 F2 0.00 Hz  
 PPMCM 0.65000 ppm/cm  
 HZCM 260.08450 Hz/cm

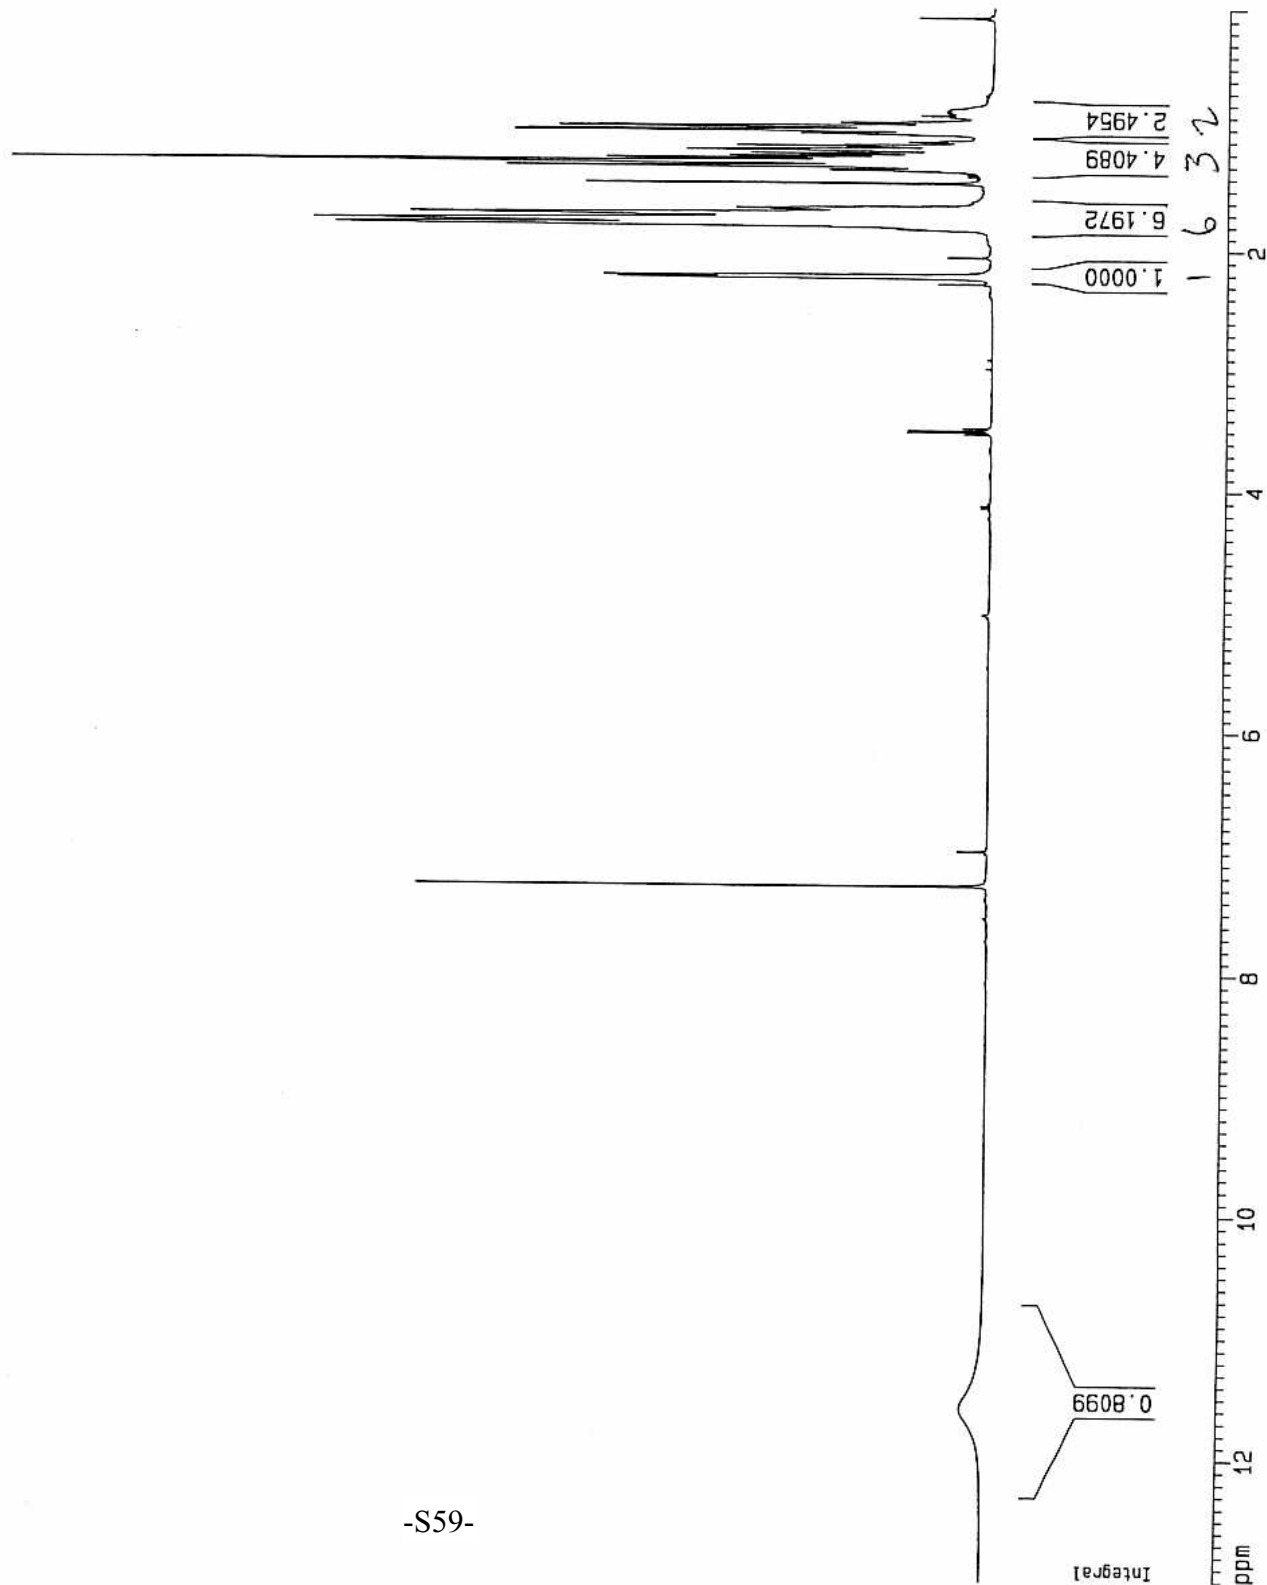

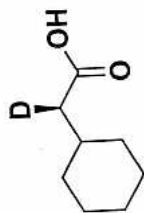

5c

SN050527 acid

Current Data Parameters  
NAME SN527-acid-C  
EXPNO 1  
PROCNO 1

F2 - Acquisition Parameters  
Date\_ 20050326  
Time 17.16  
INSTRUM spect  
PROBHD 5mm BB-1  
PULPROG zgpg30  
TD 65536  
SOLVENT CDCl3  
NS 223  
DS 4  
SWH 25125.629 Hz  
FIDRES 0.383387 Hz  
AQ 1.3042164 sec  
RG 2048  
DM 19.900 usec  
DE 6.00 usec  
TE 300.0 K  
D1 2.00000000 sec  
d11 0.03000000 sec  
d12 0.00002000 sec

===== CHANNEL f1 =====  
NUC1 13C  
P1 15.25 usec  
PL1 3.00 dB  
SFO1 100.6237959 MHz

===== CHANNEL f2 =====  
CPDPRG2 waltz16  
NUC2 1H  
PCPD2 107.50 usec  
PL2 0.00 dB  
PL12 24.00 dB  
PL13 24.00 dB  
SFO2 400.1316005 MHz

F2 - Processing parameters  
SI 32768  
SF 100.6127492 MHz  
WDW EM  
SSB 0  
LB 1.00 Hz  
GB 0  
PC 1.40

1D NMR plot parameters  
CX 20.00 cm  
F1P 210.000 ppm  
F1 21128.68 Hz  
F2P 0.000 ppm  
F2 0.00 Hz  
PPMCM 10.50000 ppm/cm  
HZCM 1056.43384 Hz/cm

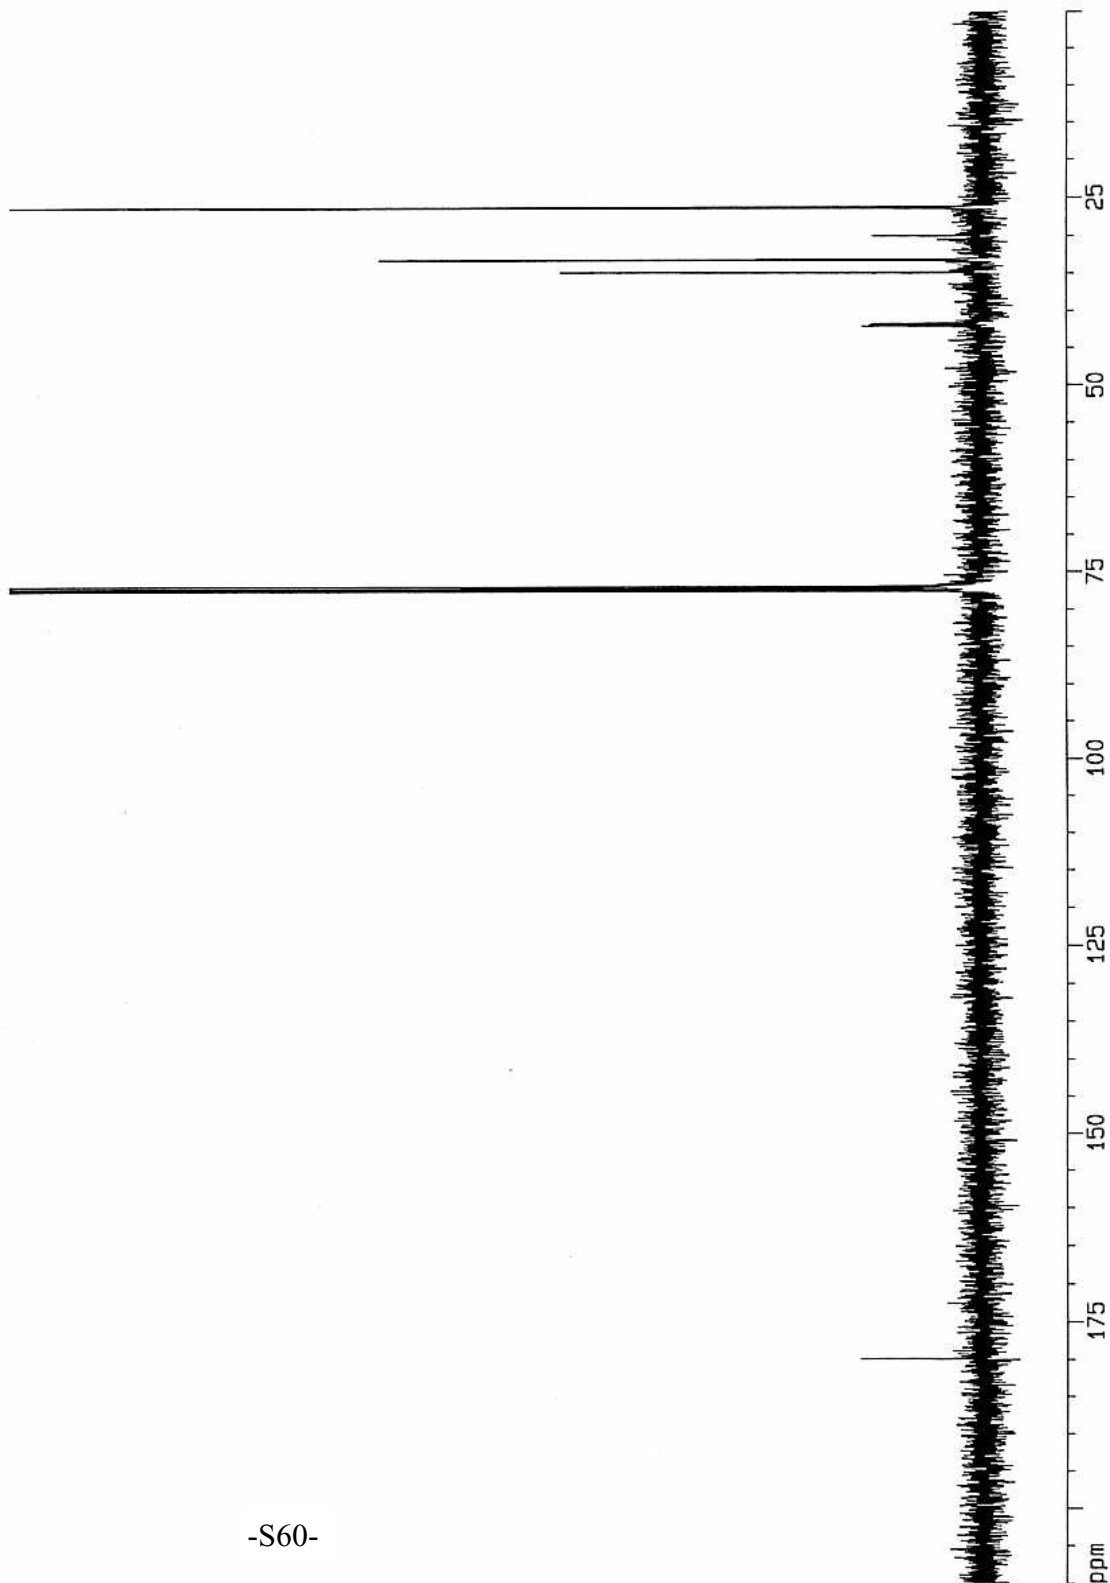

SN050527 ester

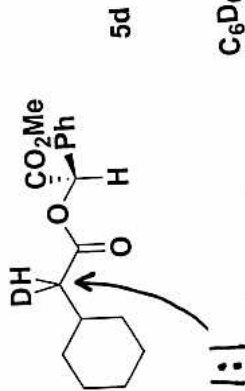

Current Data Parameters  
 NAME SN527-ester-H  
 EXPNO 2  
 PROCNO 1

F2 - Acquisition Parameters  
 Date\_ 20050329  
 Time 21.11  
 INSTRUM spect  
 PROBHD 5 mm QNP 1H/1  
 PULPROG zg30  
 TD 65536  
 SOLVENT C6D6  
 NS 32  
 DS 2  
 SWH 8278.146 Hz  
 FIDRES 0.126314 Hz  
 AQ 3.9584243 sec  
 RG 256  
 DM 60.400 usec  
 DE 6.00 usec  
 TE 712.3 K  
 D1 1.00000000 sec  
 MCREST 0.00000000 sec  
 MCWPK 0.01500000 sec

===== CHANNEL f1 =====  
 NUC1 1H  
 P1 9.88 usec  
 PL1 3.00 dB  
 SF01 400.1324710 MHz

F2 - Processing parameters  
 SI 32768  
 SF 400.1300440 MHz  
 MDW EM  
 SSB 0  
 LB 0.30 Hz  
 GB 0  
 PC 1.00

1D NMR plot parameters  
 CX 20.00 cm  
 CY 11.00 cm  
 F1P 10.000 ppm  
 F1 4001.30 Hz  
 F2P 0.000 ppm  
 F2 0.00 Hz  
 PPMCM 0.50000 ppm/cm  
 HZCM 200.06502 Hz/cm

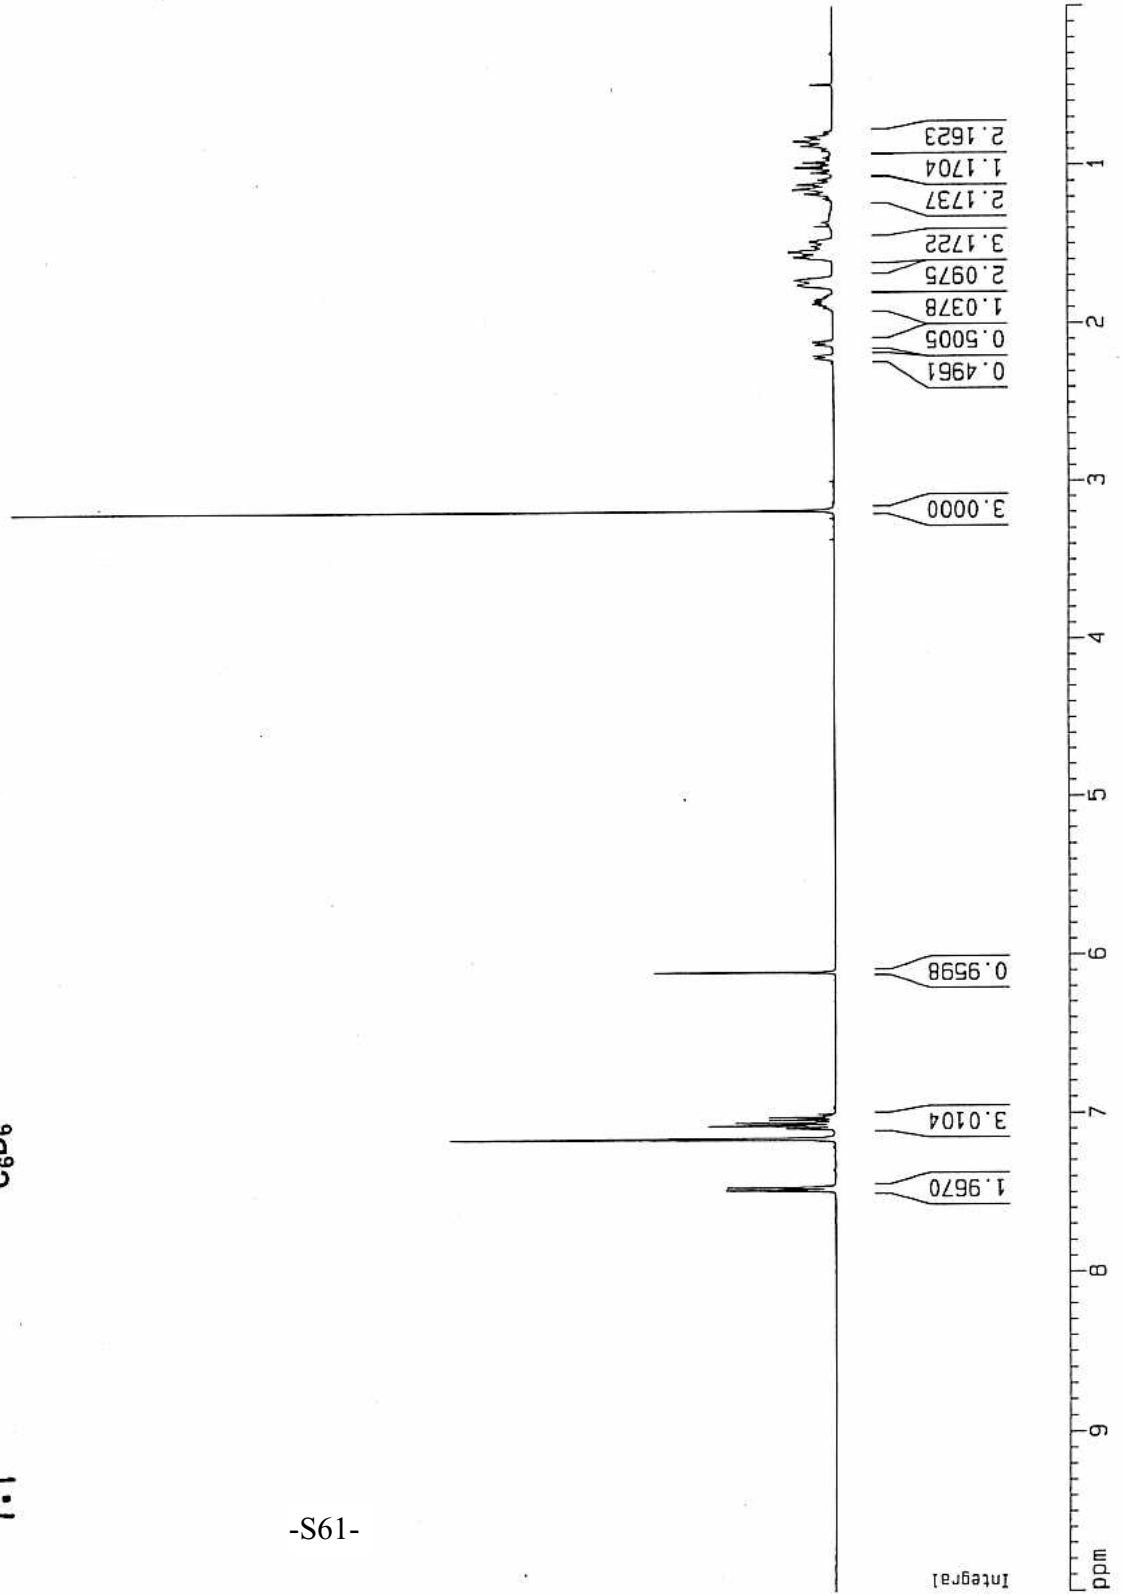

SN050527 ester

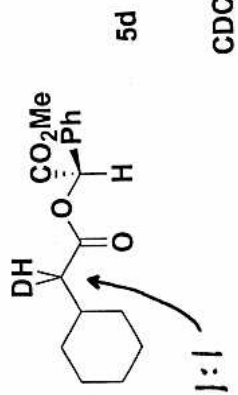

Current Data Parameters  
 NAME SN527-ester-H  
 EXPNO 1  
 PROCNO 1

F2 - Acquisition Parameters  
 Date\_ 20050327  
 Time 18.02  
 INSTRUM spect  
 PROBHD 5mm BBO BB-1  
 PULPROG zg30  
 TD 65536  
 SOLVENT CDCl3  
 NS 20  
 DS 2  
 SWH 8278.146 Hz  
 FIDRES 0.126314 Hz  
 AQ 3.9584243 sec  
 RG 114  
 DW 60.400 usec  
 DE 6.00 usec  
 TE 300.0 K  
 D1 1.0000000 sec

===== CHANNEL f1 =====  
 NUC1 1H  
 P1 7.90 usec  
 PL1 0.00 dB  
 SF01 400.1324710 MHz

F2 - Processing parameters  
 SI 32768  
 SF 400.1300055 MHz  
 WDW EM  
 SSB 0  
 LB 0.30 Hz  
 GB 0  
 PC 1.00

1D NMR plot parameters  
 CX 20.00 cm  
 FIP 10.000 ppm  
 F1 4001.30 Hz  
 F2P 0.000 ppm  
 F2 0.00 Hz  
 PPMCM 0.50000 ppm/cm  
 HZCM 200.06500 Hz/cm

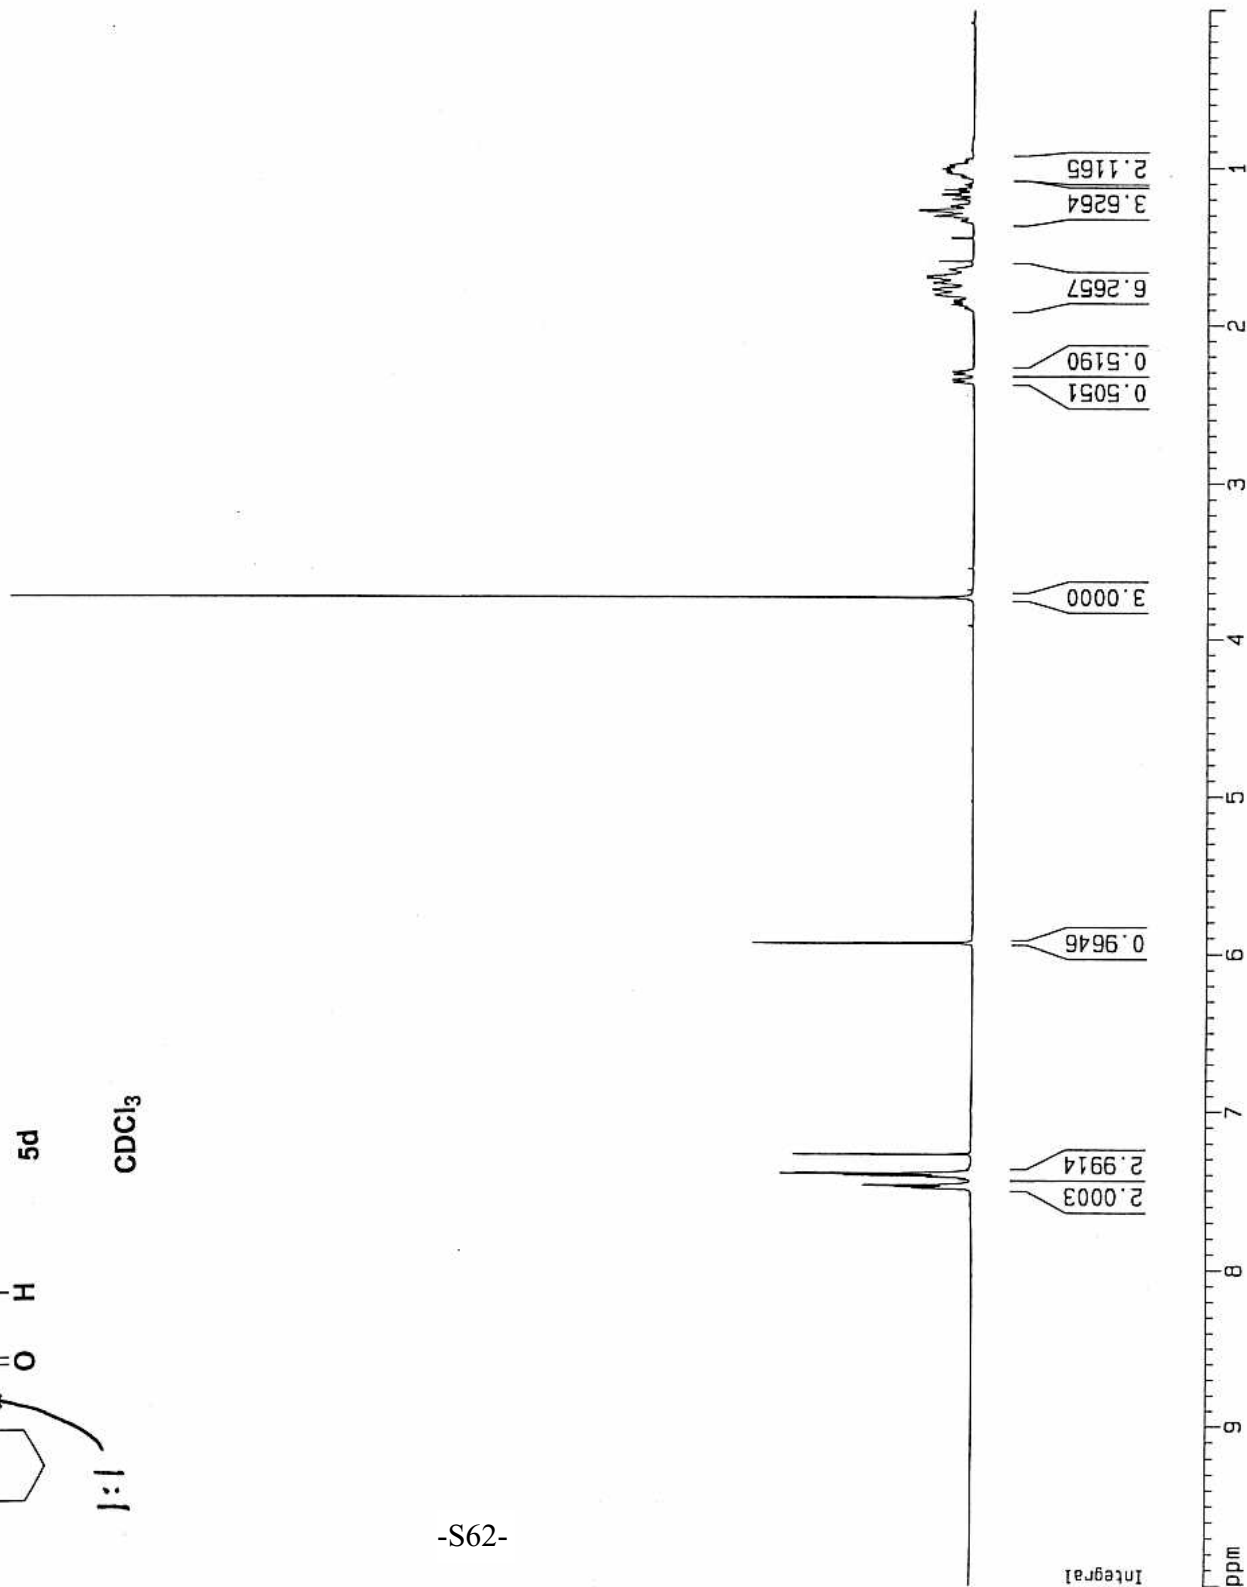

SN050527 ester

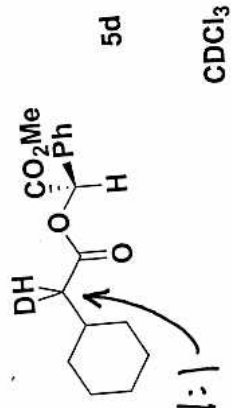

```

Current Data Parameters
NAME      SN527-ester-C
EXPNO     1
PROCNO    1

F2 - Acquisition Parameters
Date_     20050327
Time      18.08
INSTRUM   spect
PROBHD    5mm BBO BB-1
PULPROG   zgpg30
TD         65536
SOLVENT   CDCl3
NS         512
DS         4
SWH        25125.629 Hz
FIDRES     0.383367 Hz
AQ         1.3042154 sec
RG          7298.2
DM         19.900 usec
DE         6.00 usec
TE         300.0 K
D1         2.00000000 sec
d11        0.03000000 sec
d12        0.00002000 sec

===== CHANNEL f1 =====
NUC1       13C
P1         15.25 usec
PL1        3.00 dB
SF01       100.6237959 MHz

===== CHANNEL f2 =====
CPDPRG2    waltz16
NUC2       1H
PCPD2      107.50 usec
PL2        0.00 dB
PL12       24.00 dB
PL13       24.00 dB
SF02       400.1315005 MHz

F2 - Processing parameters
SI         32768
SF         100.6127499 MHz
WDW        EM
SSB        0
LB         1.00 Hz
GB         0
PC         1.40

1D NMR plot parameters
CX         20.00 cm
F1P        200.000 ppm
F1         20122.55 Hz
F2P        0.000 ppm
F2         0.00 Hz
PPMCM      10.00000 ppm/cm
HZCM       1006.12744 Hz/cm
  
```

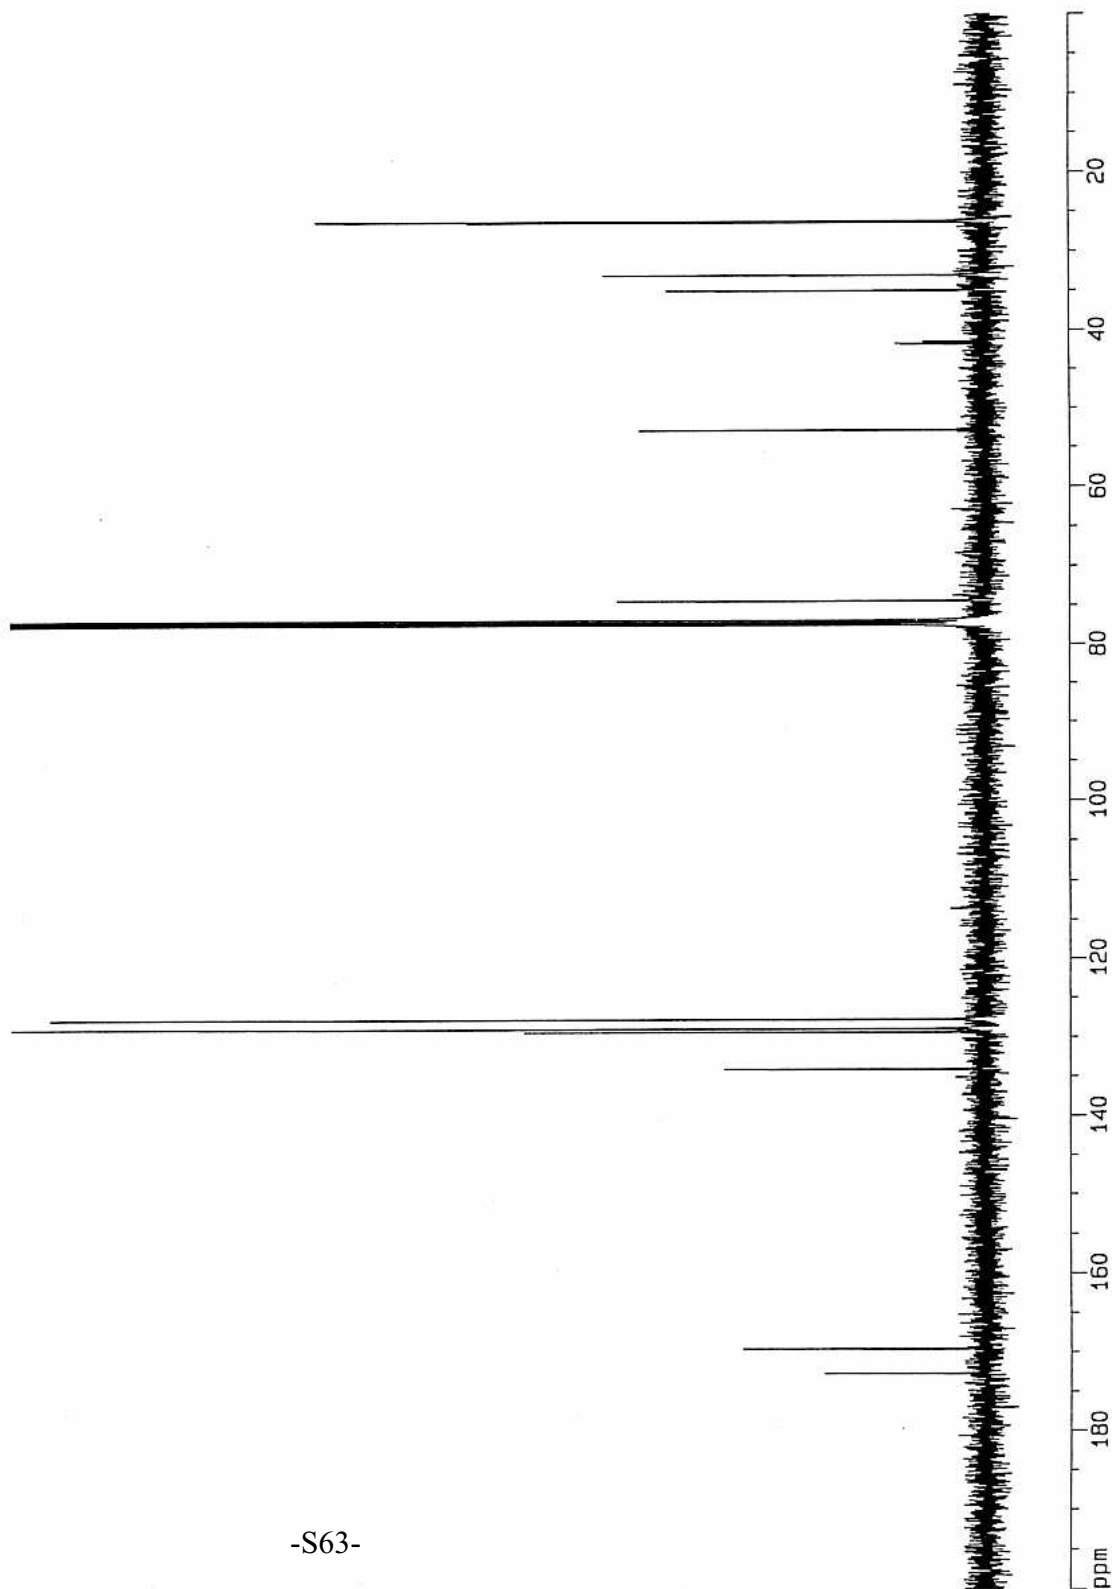

Supplement: Supplementary file 1 [file 5122828]
